# Supplementary material for: Transition-metal- and oxidant-free three-component reaction of quinoline N-oxides, sodium metabisulfite and aryldiazonium tetrafluoroborates via a dual radical coupling process
Source: Royal Society of Chemistry journal article supplement (doi:10.1039/c9ob02106j), 2019-01-01

# Transition-metal and oxidant-free three-component reaction of quinoline *N*-oxides, sodium metabisulfite and aryldiazonium tetrafluoroborates *via* a dual radical coupling process

Guirong You,<sup>a</sup> Dan Xi,<sup>b</sup> Jian Sun,<sup>a</sup> Liqiang Hao,<sup>a</sup> and Chengcai Xia<sup>a\*</sup>

<sup>a</sup> Pharmacy College, Shandong First Medical University & Shandong Academy of Medical Sciences, Taian 271000 (China). E-mail: xiachc@163.com

<sup>b</sup> Shandong Institute for Product Quality Inspection, Jinan 250102 (China).

## Supporting Information

### Table of contents

|                                                             |   |
|-------------------------------------------------------------|---|
| 1. X-ray Crystal Data for <b>3w</b>                         | 3 |
| 2. Copies of <sup>1</sup> H and <sup>13</sup> C NMR Spectra | 4 |

Ineffective substrates:

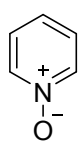

1j

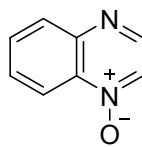

1k

Mechanism study:

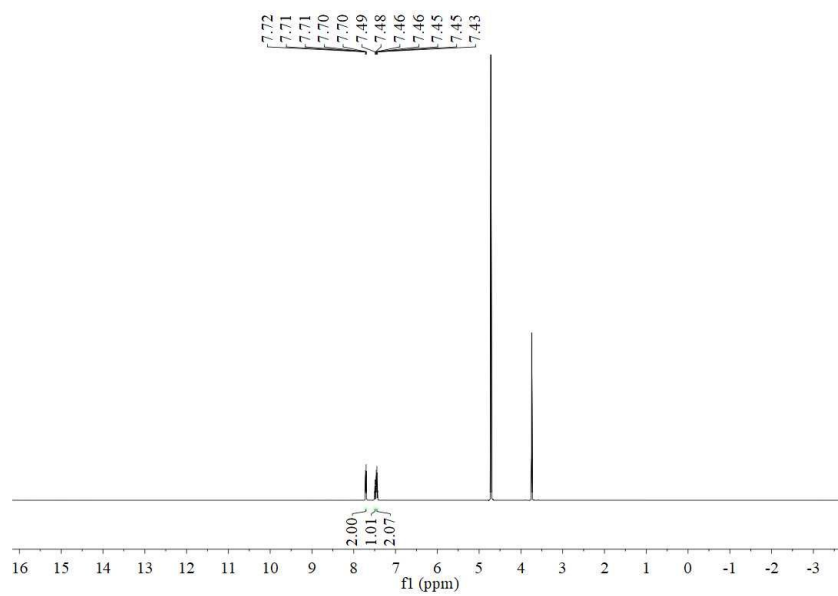

The benzenesulfonic acid in the reaction mixture was detected by  $^1\text{H}$  NMR

## 1. X-ray Crystal Data for **3w**

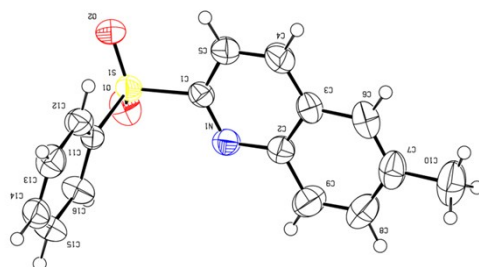

**Figure 1** Single-crystal X-ray structure of **3w**. Ellipsoids are represented at 30% probability.

**Table S1.** Crystallographic data and structure refinement for **3w**

|                                                |                                                   |
|------------------------------------------------|---------------------------------------------------|
| CCDC                                           | 1953274                                           |
| Empirical formula                              | C <sub>16</sub> H <sub>13</sub> NO <sub>2</sub> S |
| Formula weight                                 | 283.33                                            |
| Temperature, K                                 | 296.15                                            |
| Wavelength, Å                                  | 0.71073                                           |
| Crystal system                                 | Triclinic                                         |
| Space group                                    | P-1                                               |
| a, b, c, Å                                     | 6.4036(12), 7.8241(19), 14.538(3)                 |
| $\alpha$ , $\beta$ , $\gamma$ , °              | 85.370(3), 89.441(2), 70.995(2)                   |
| Volume, Å <sup>3</sup>                         | 686.3(3)                                          |
| Z                                              | 2                                                 |
| Calculated density, Mg/m <sup>3</sup>          | 1.371                                             |
| Absorption coefficient, mm <sup>-1</sup>       | 0.236                                             |
| F (000)                                        | 296                                               |
| Theta range for data collection, °             | 2.763 to 27.582                                   |
| Limiting indices                               | -8 ≤ h ≤ 7, -10 ≤ k ≤ 10, -18 ≤ l ≤ 18            |
| Reflections collected / unique                 | 5484 / 2928 [R(int) = 0.0197]                     |
| Refinement method                              | Full-matrix least-squares on F <sup>2</sup>       |
| Data / restraints / parameters                 | 2928 / 0 / 182                                    |
| Goodness of fit on F <sup>2</sup>              | 1.058                                             |
| Final R indices [I > 2σ(I)]                    | R1 = 0.0424, wR2 = 0.1328                         |
| R indices (all data)                           | R1 = 0.0545, wR2 = 0.1445                         |
| Extinction coefficient                         | n/a                                               |
| Largest diff. peak and hole e. Å <sup>-3</sup> | 0.208 and -0.338                                  |

## 2. Copies of $^1\text{H}$ and $^{13}\text{C}$ NMR Spectra

### 3a $^1\text{H}$ NMR

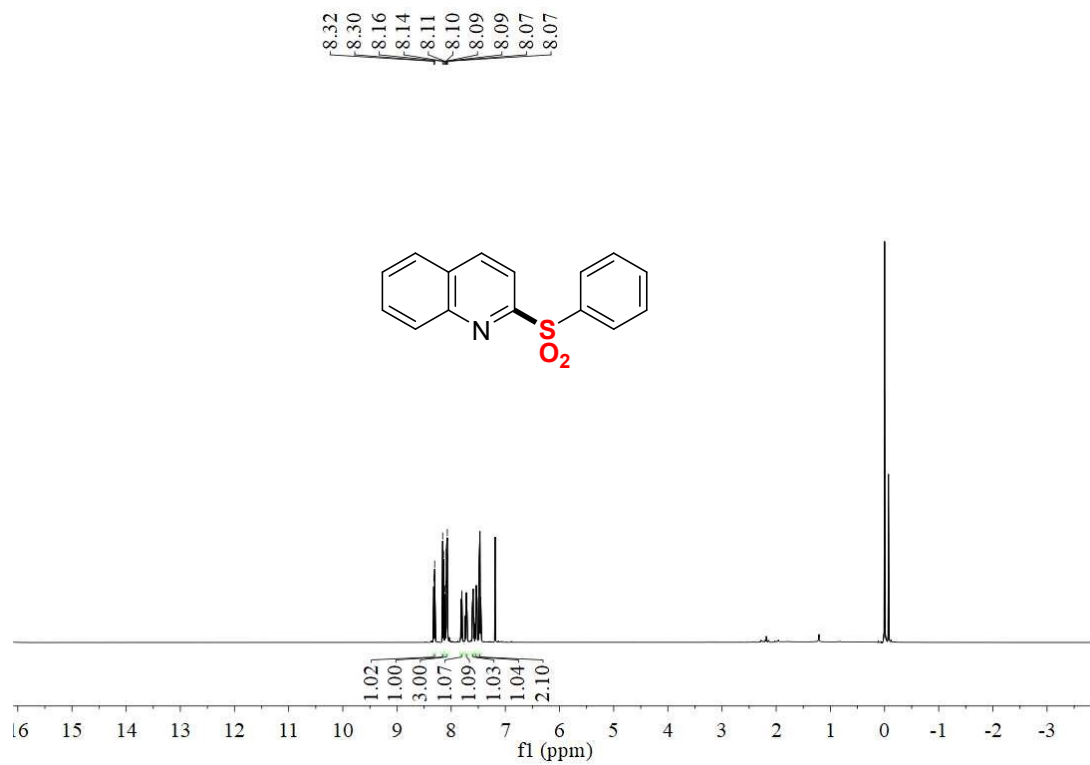

### 3a $^{13}\text{C}$ NMR

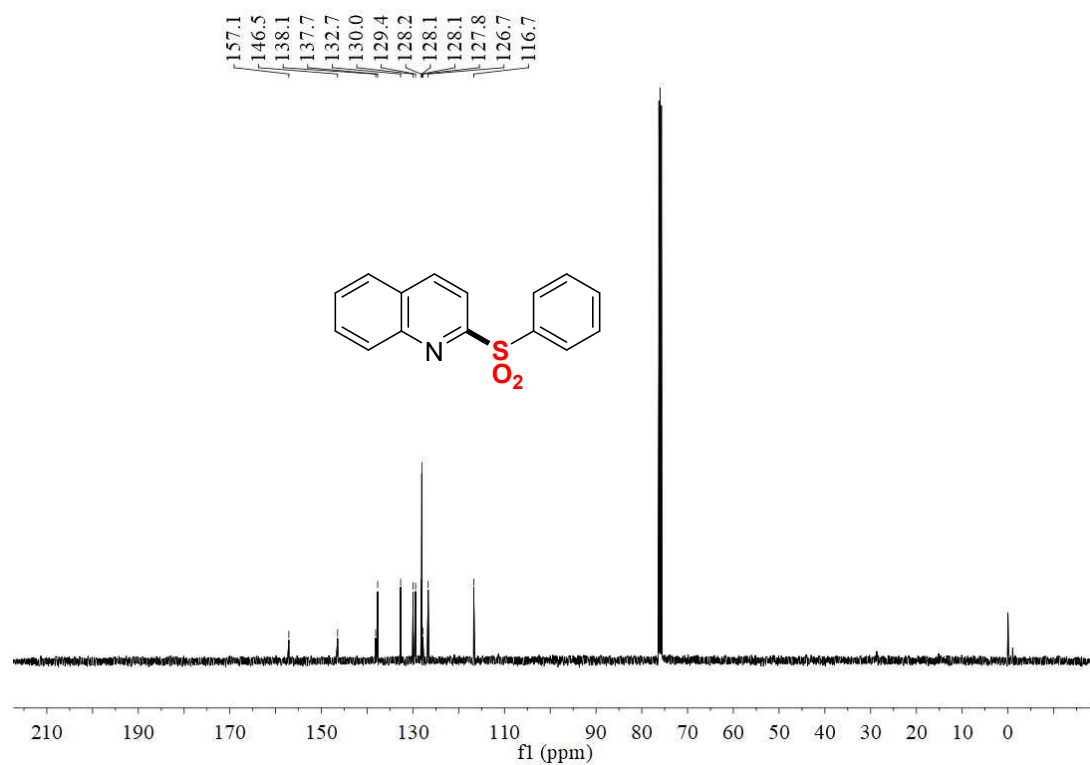

### 3b <sup>1</sup>H NMR

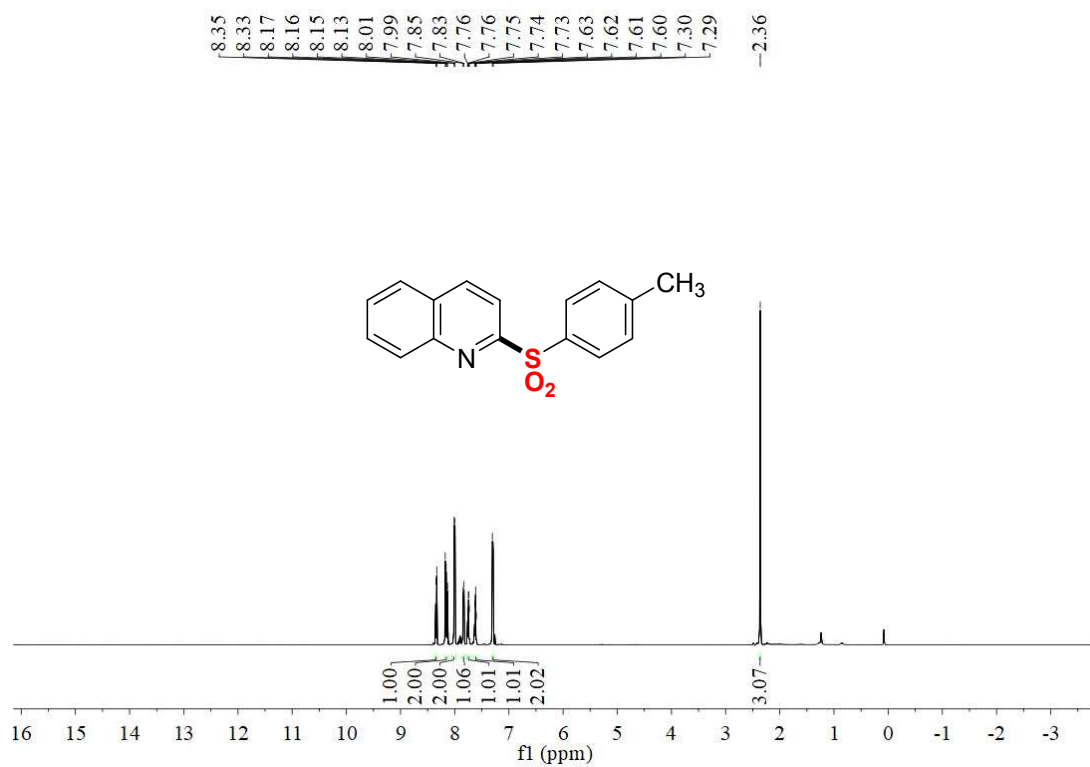

### 3b <sup>13</sup>C NMR

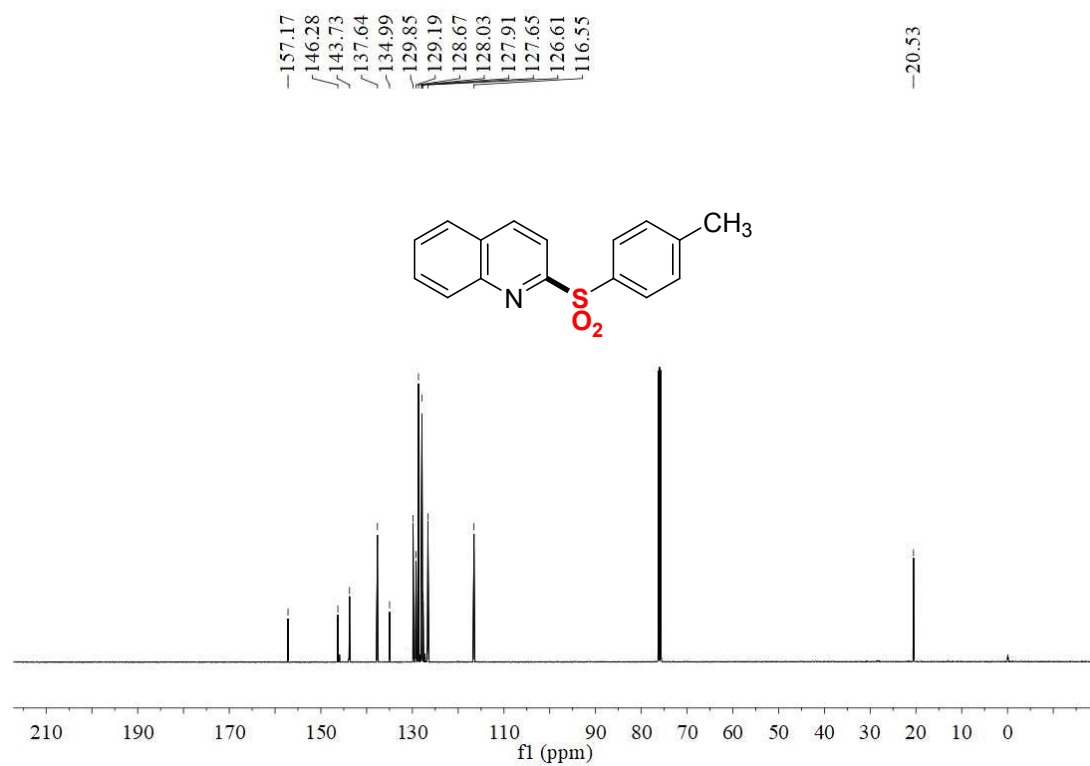

3c <sup>1</sup>H NMR

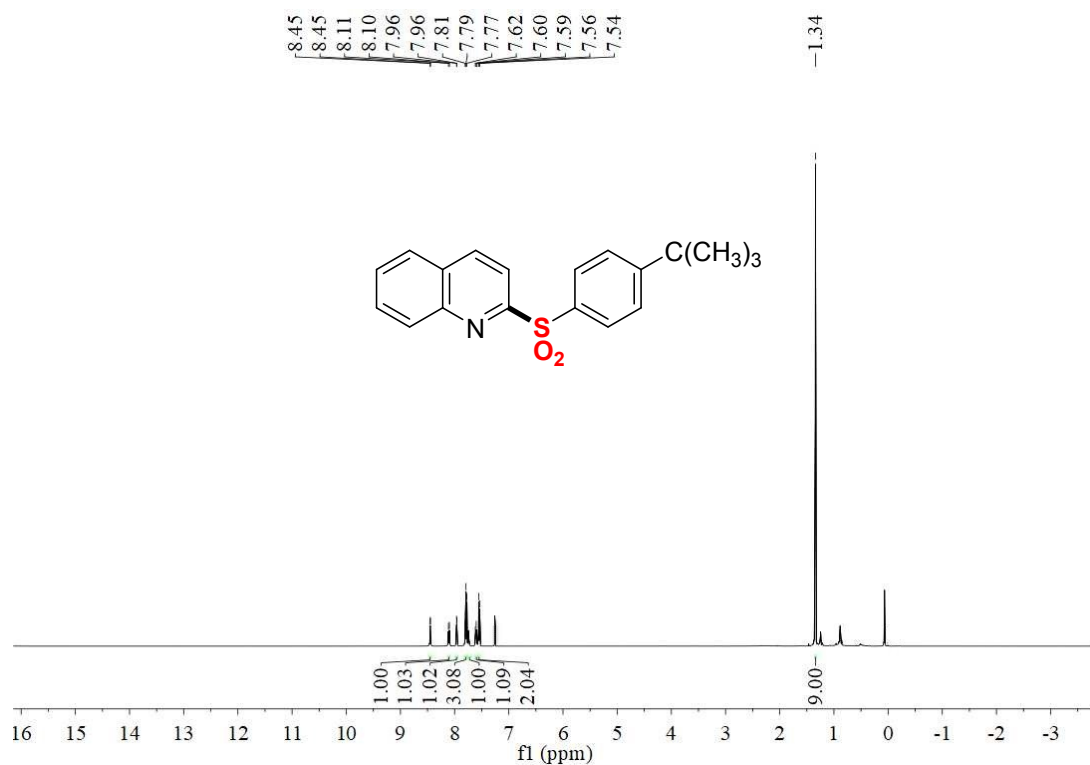

3c <sup>13</sup>C NMR

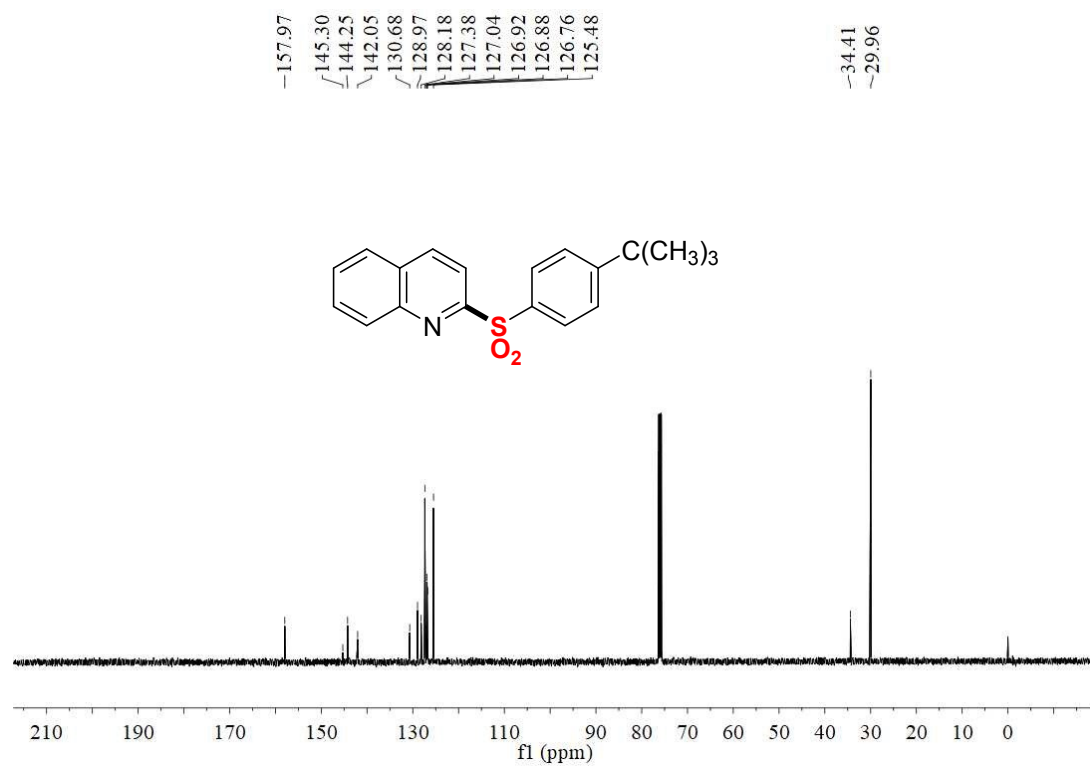

### 3d <sup>1</sup>H NMR

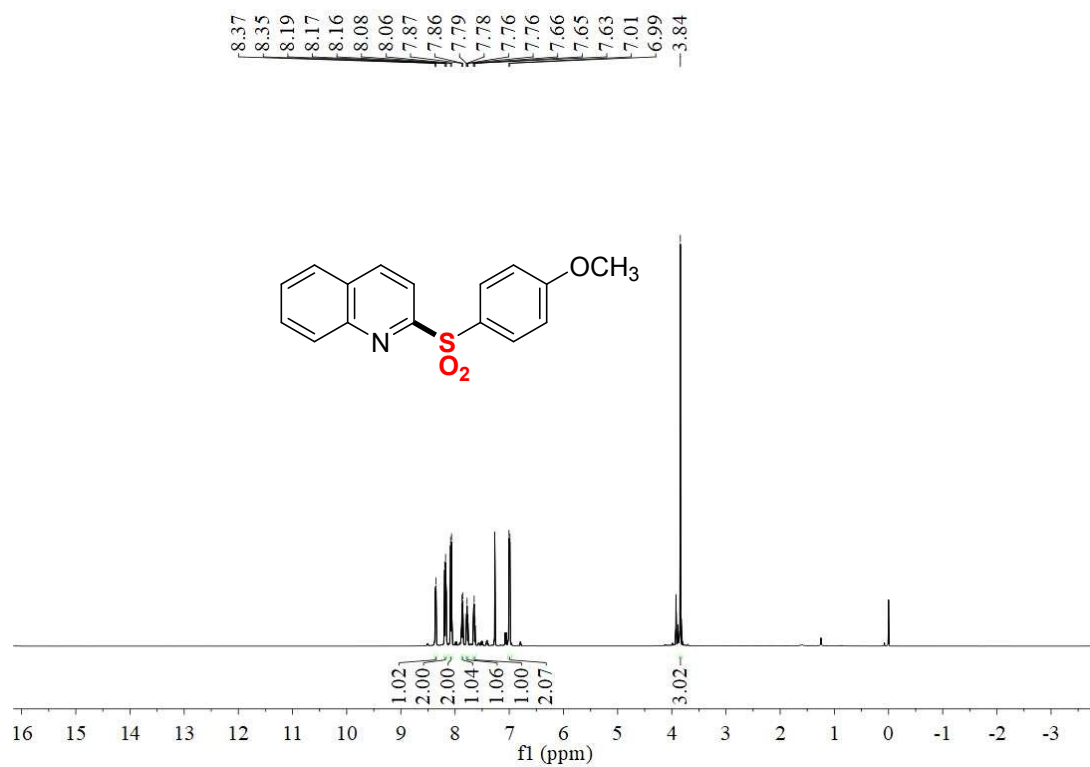

### 3d <sup>13</sup>C NMR

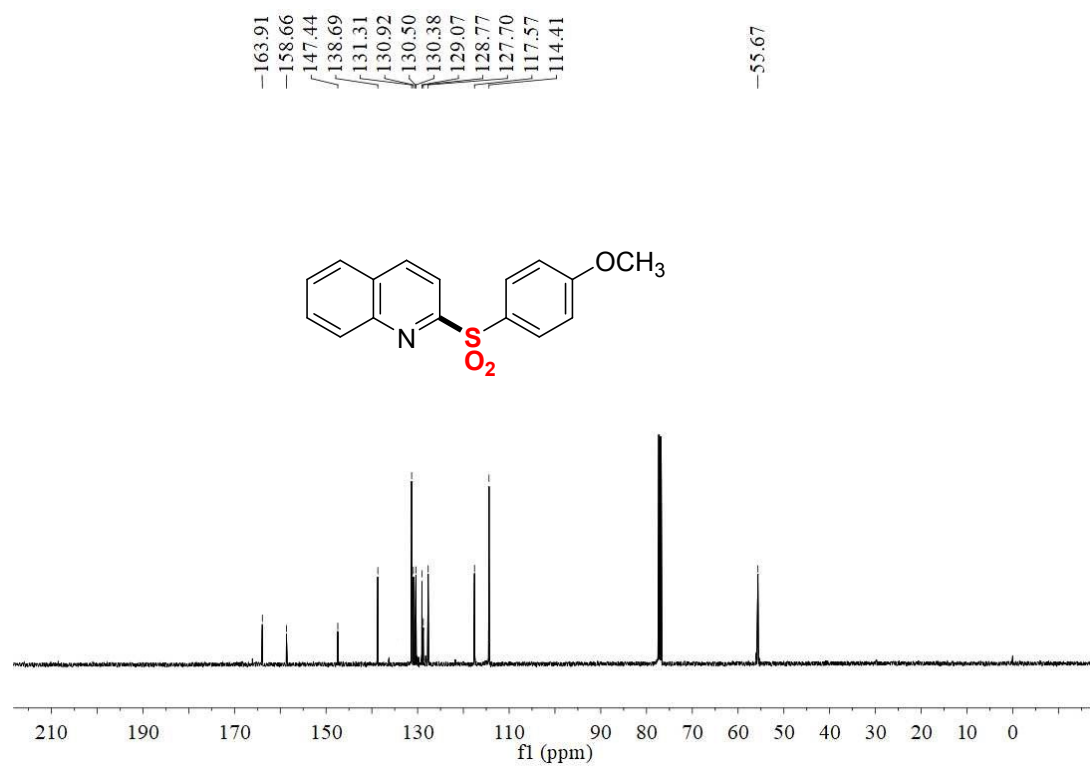

3e <sup>1</sup>H NMR

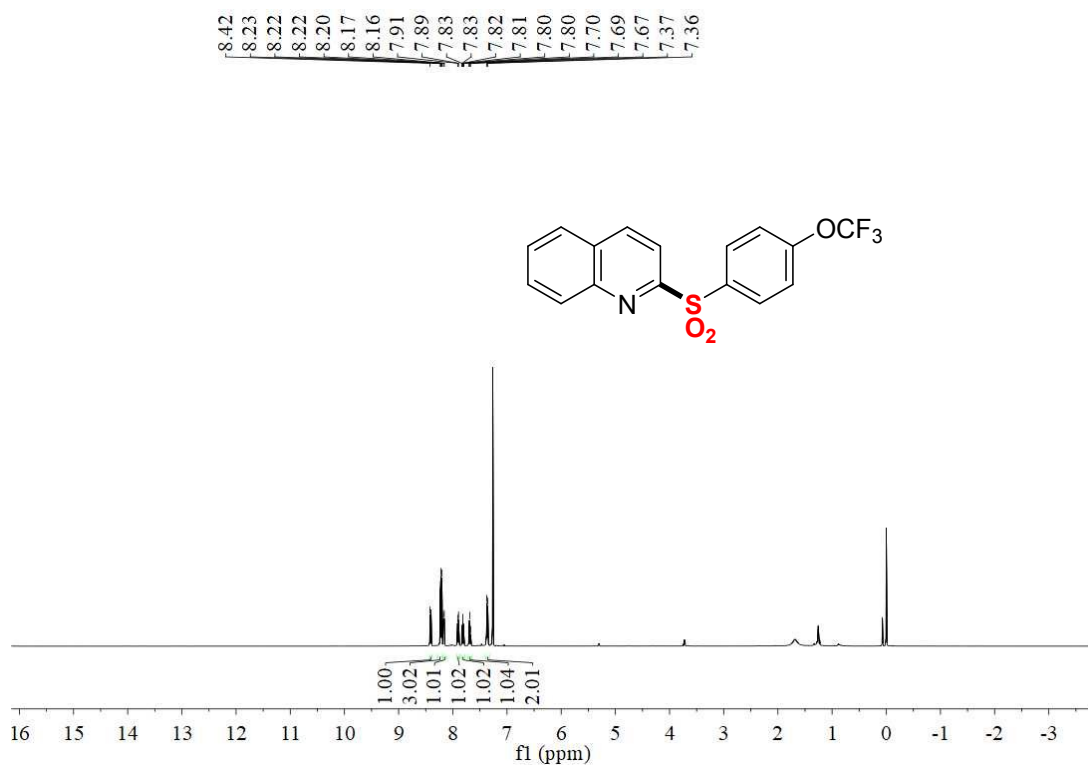

3e <sup>13</sup>C NMR

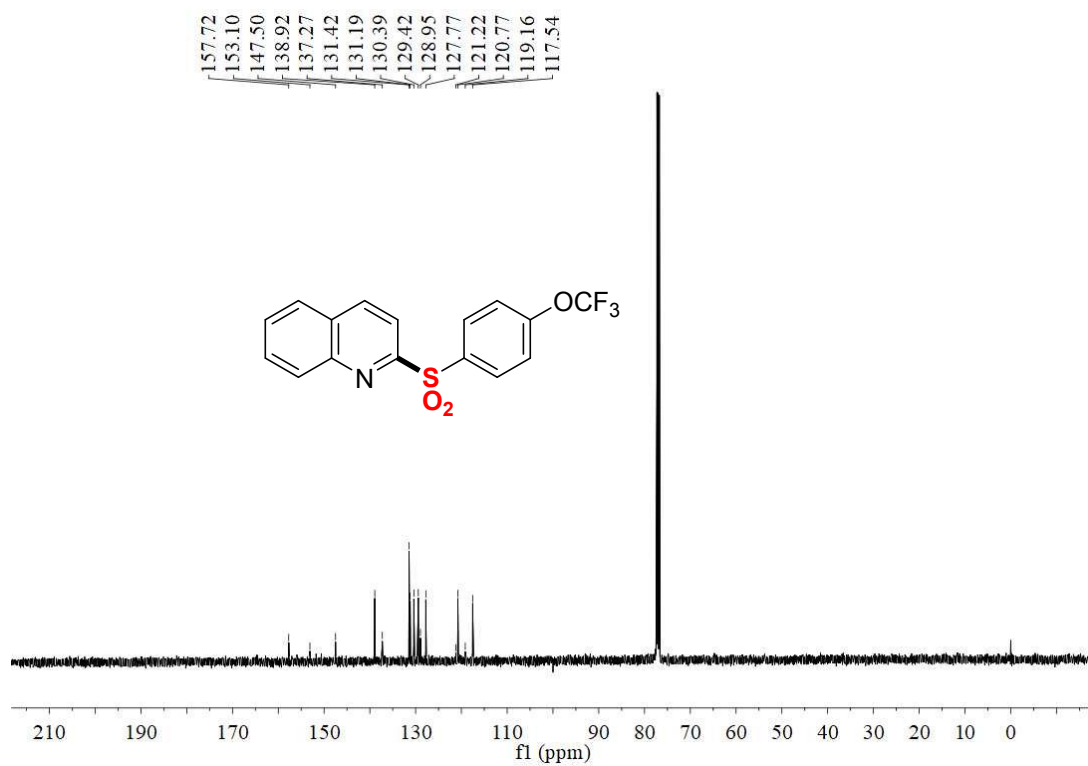



### 3f <sup>1</sup>H NMR

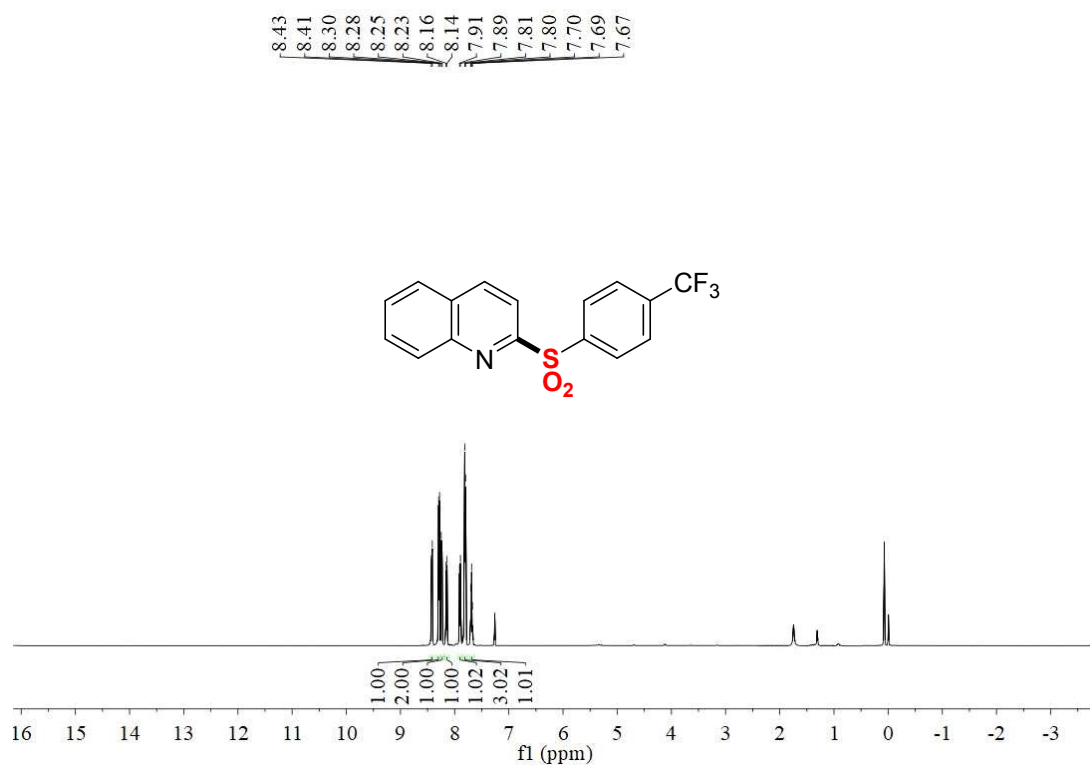

### 3f <sup>13</sup>C NMR

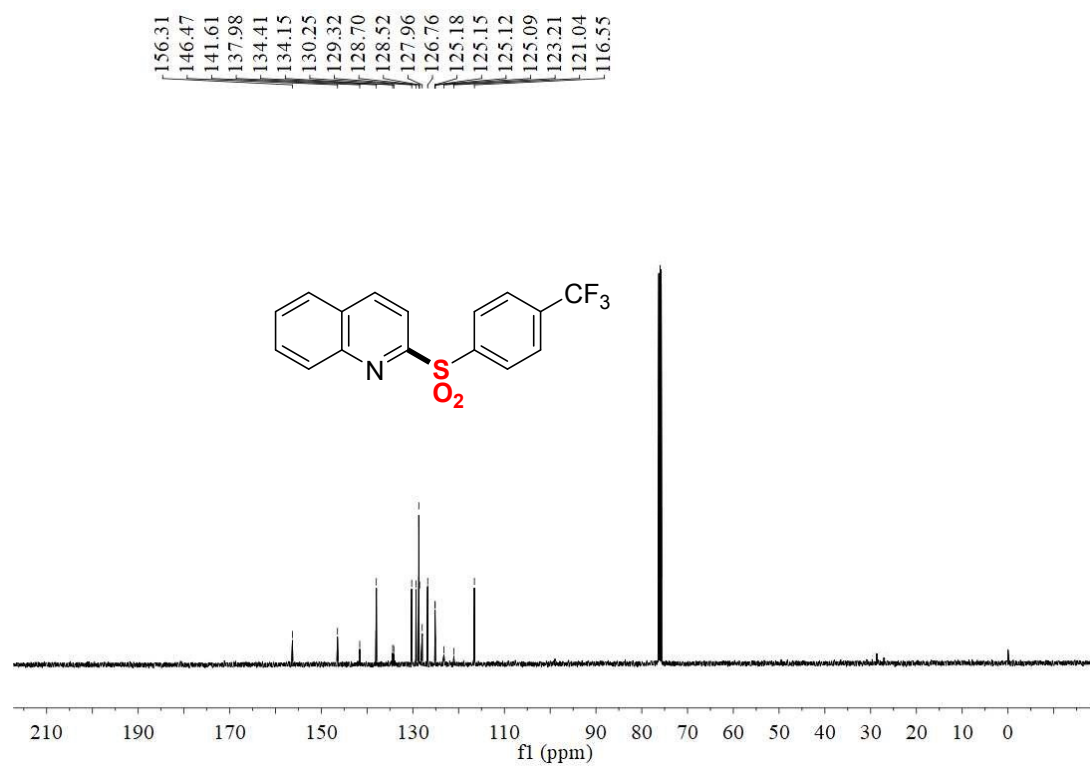

### 3g <sup>1</sup>H NMR

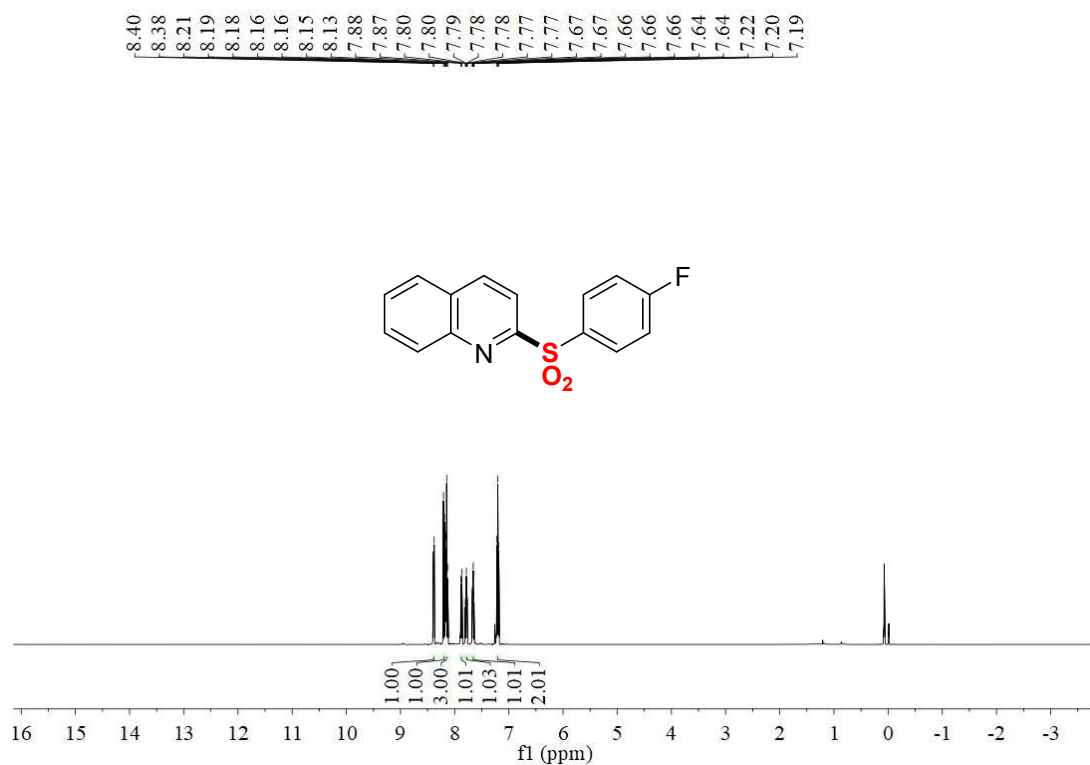

### 3g <sup>13</sup>C NMR

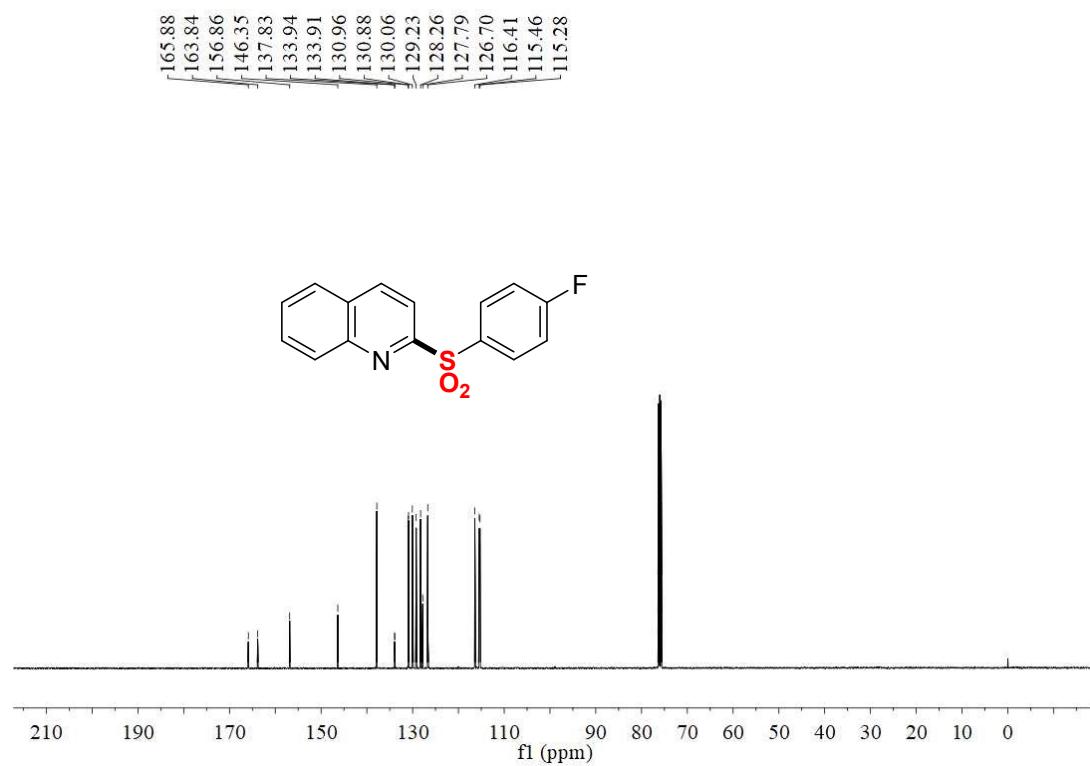

### 3h <sup>1</sup>H NMR

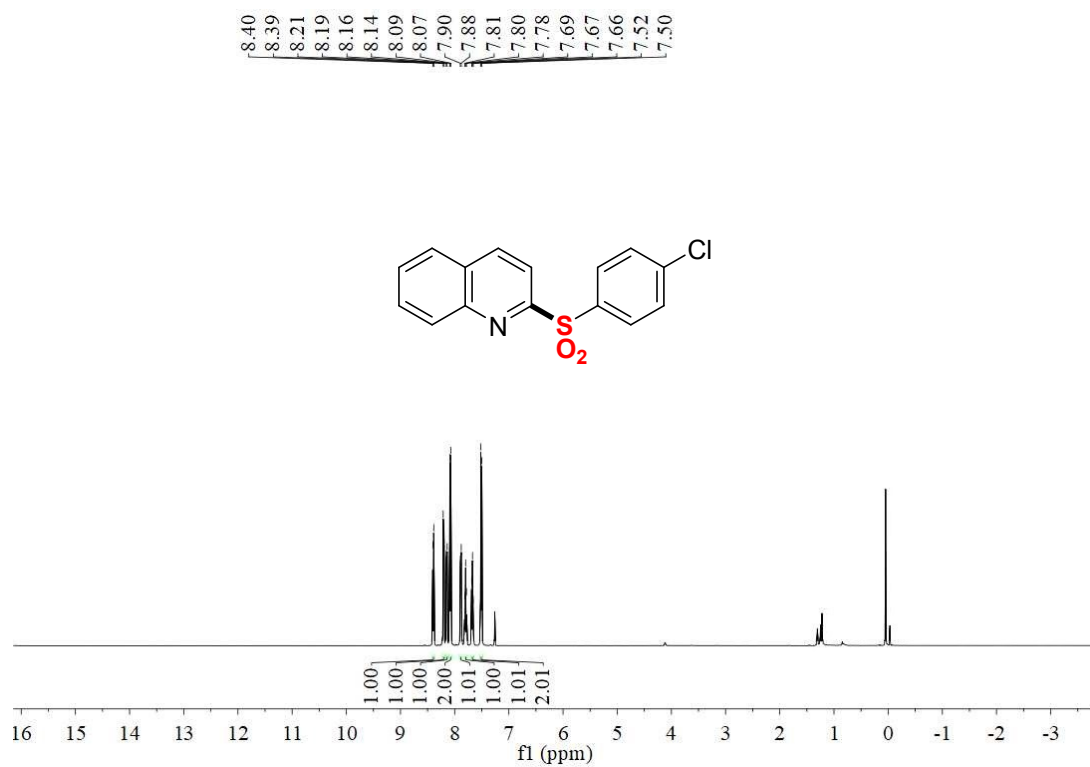

### 3h <sup>13</sup>C NMR

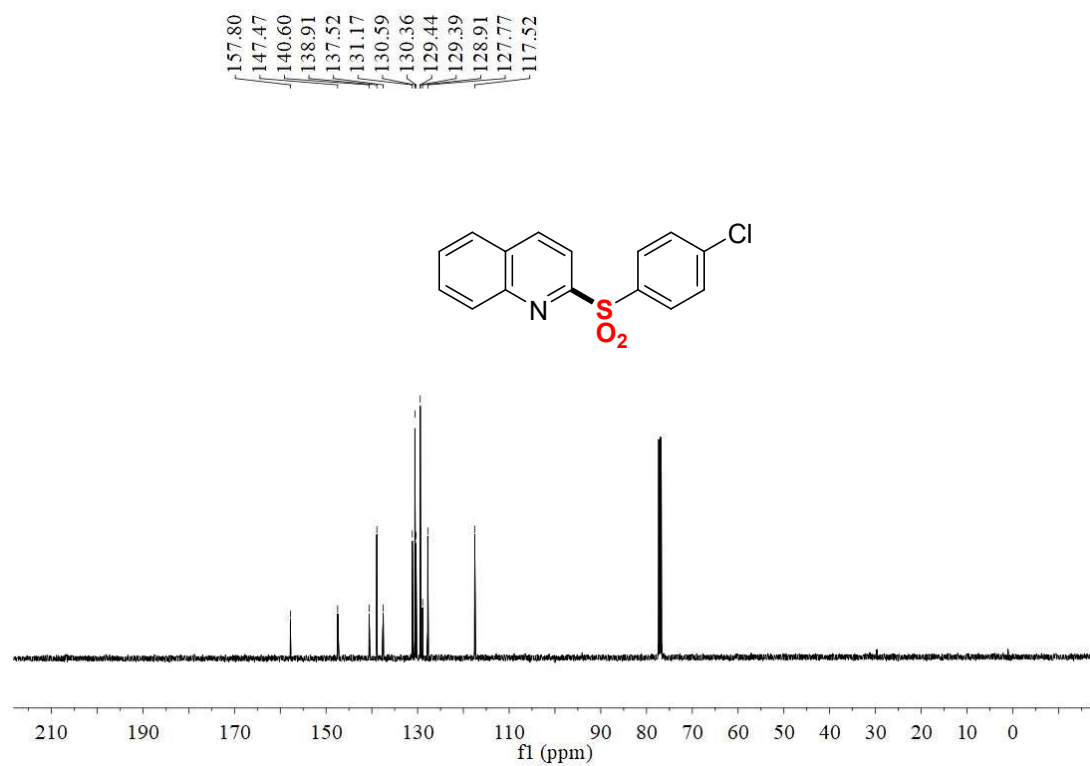

### 3i <sup>1</sup>H NMR

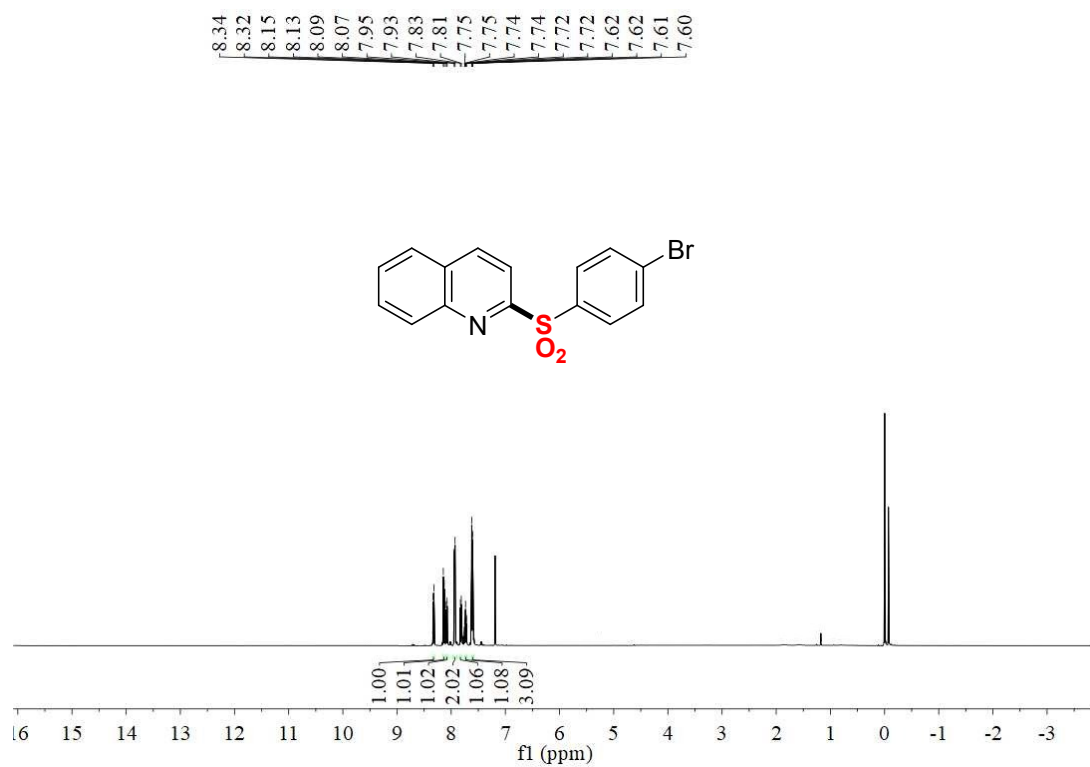

### 3i <sup>13</sup>C NMR

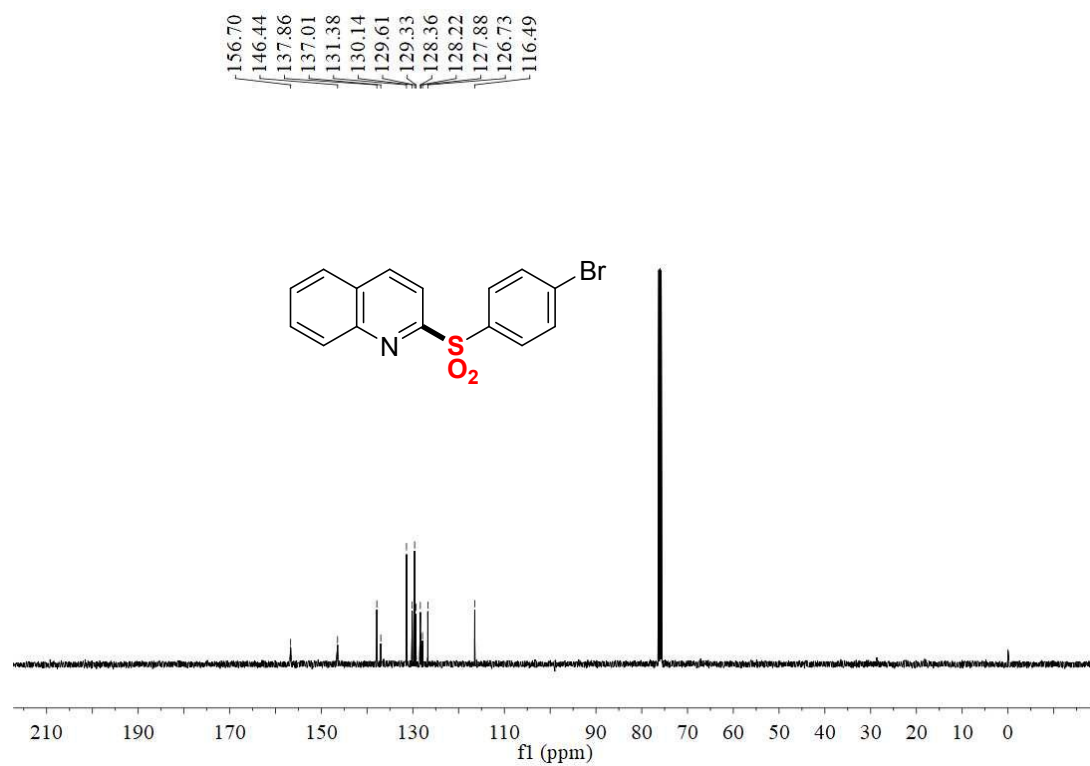

### 3j <sup>1</sup>H NMR

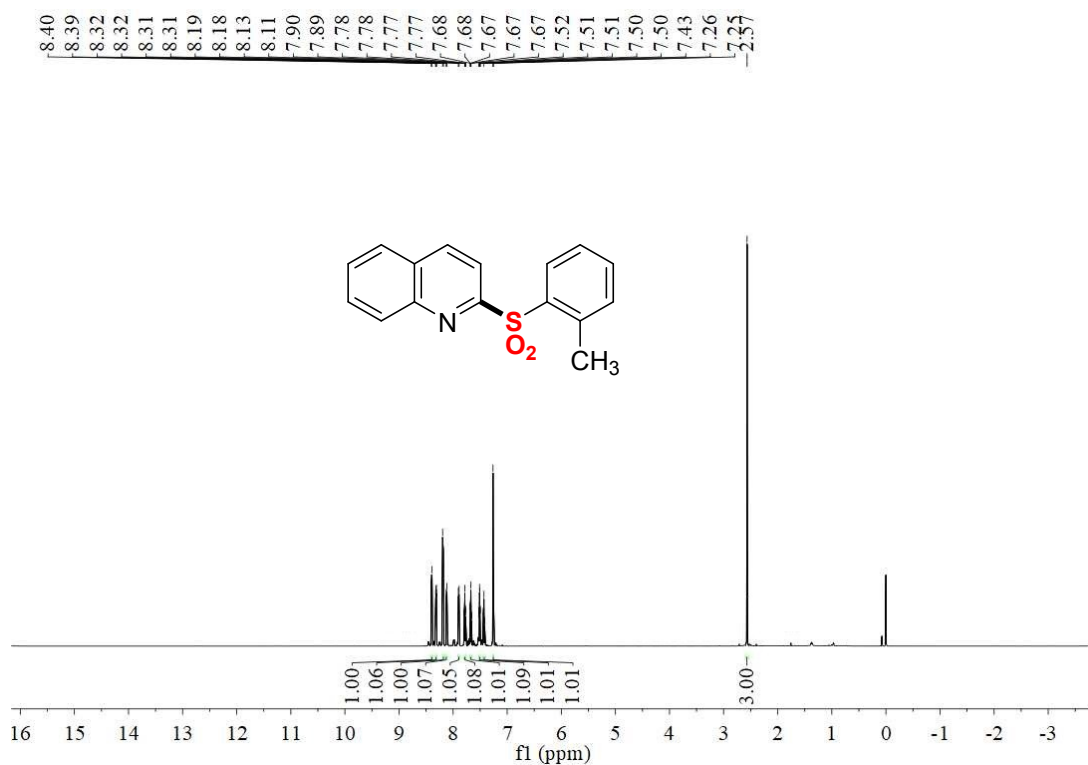

### 3j <sup>13</sup>C NMR

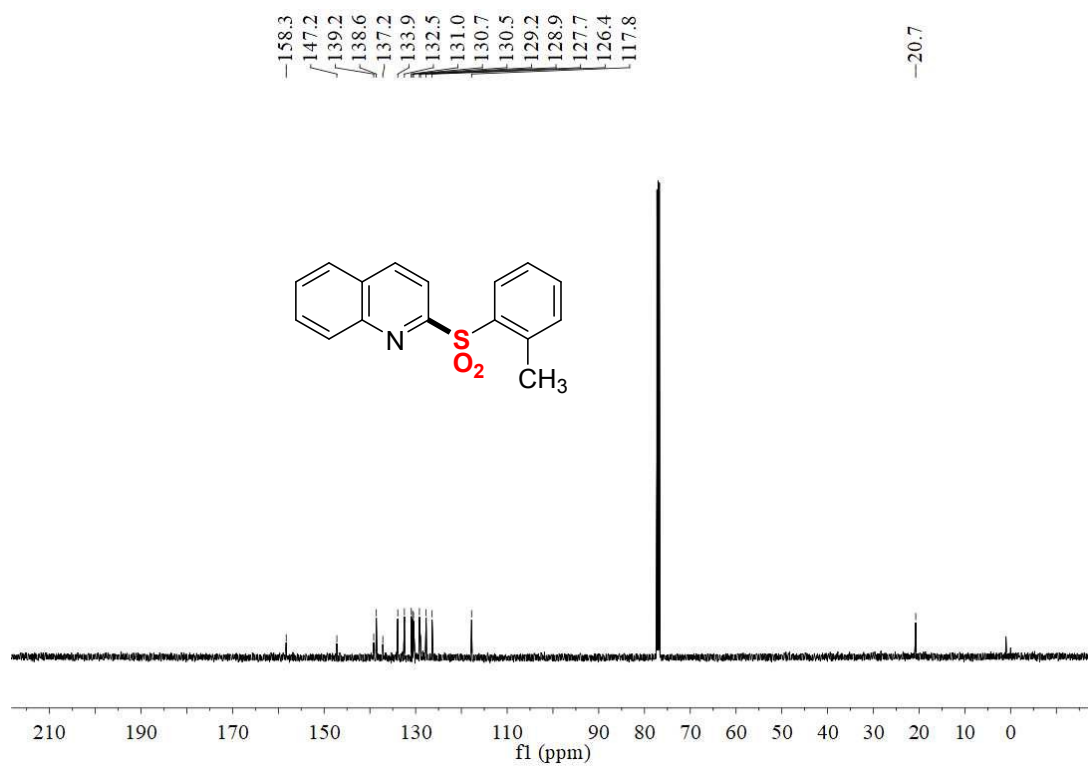

### 3k <sup>1</sup>H NMR

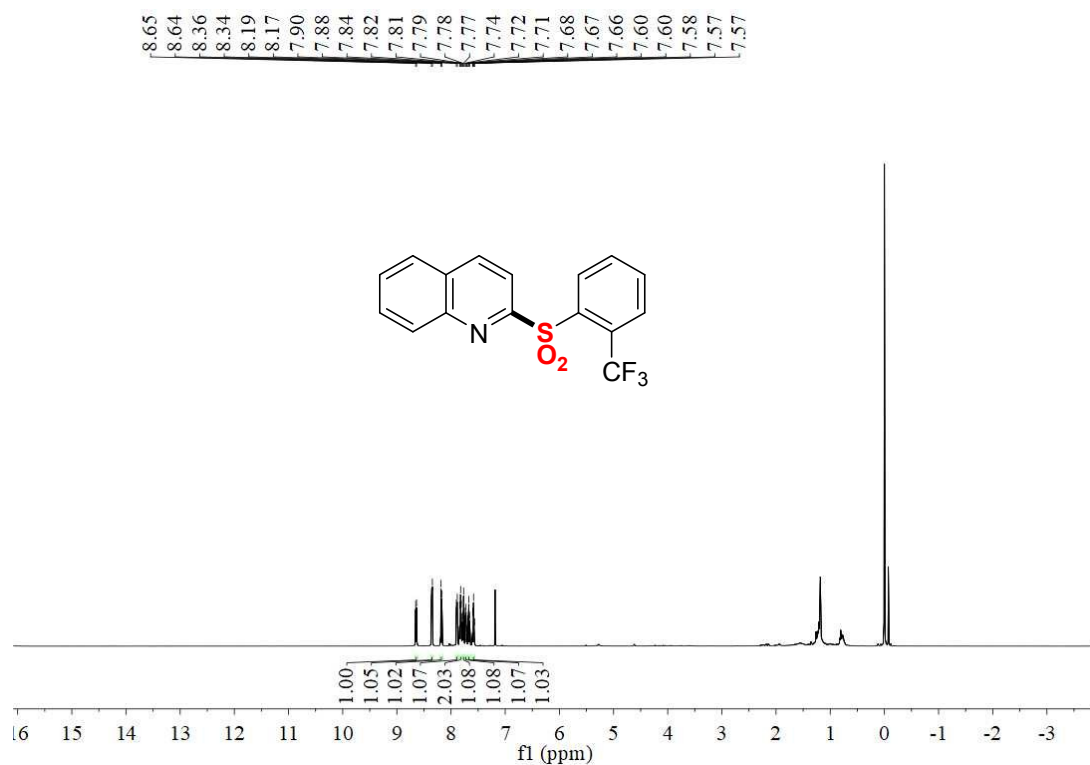

### 3k <sup>13</sup>C NMR

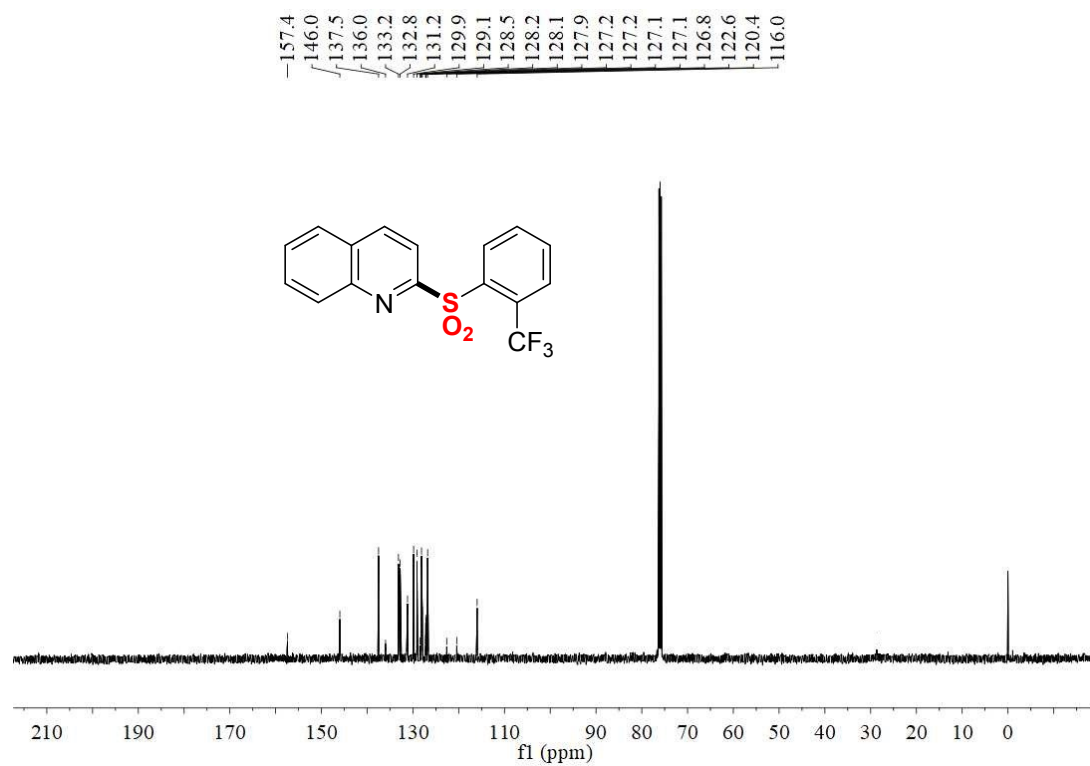

### 3I <sup>1</sup>H NMR

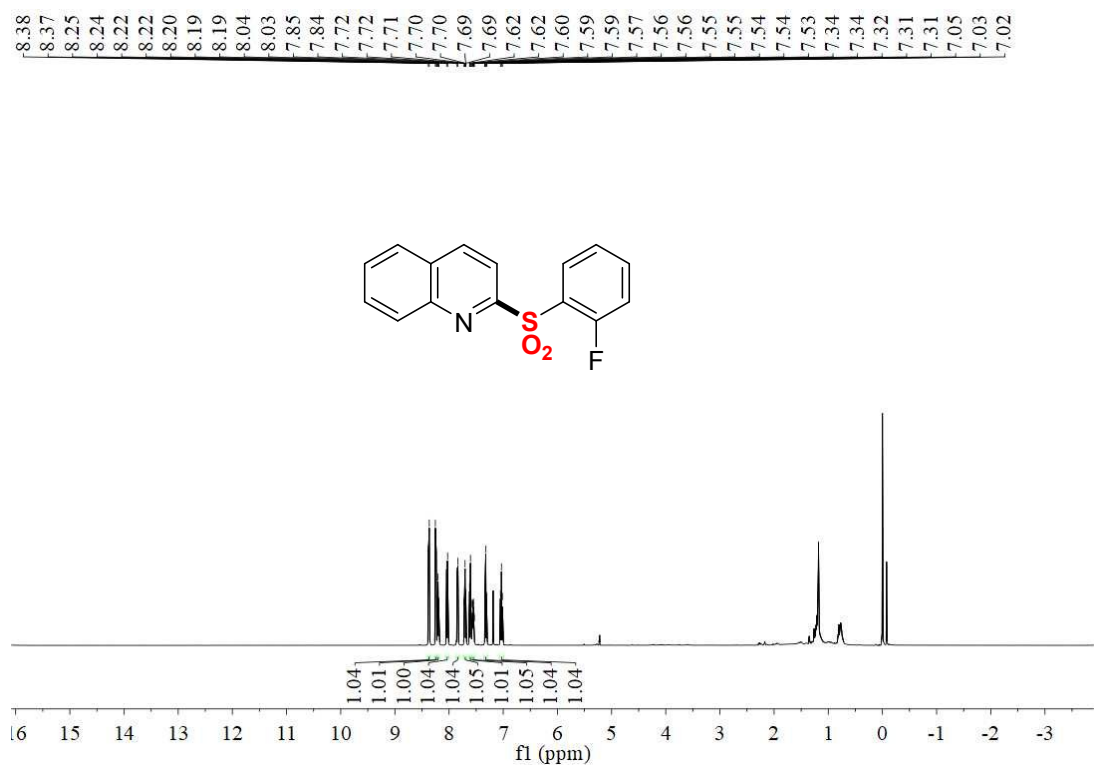

### 3I <sup>13</sup>C NMR

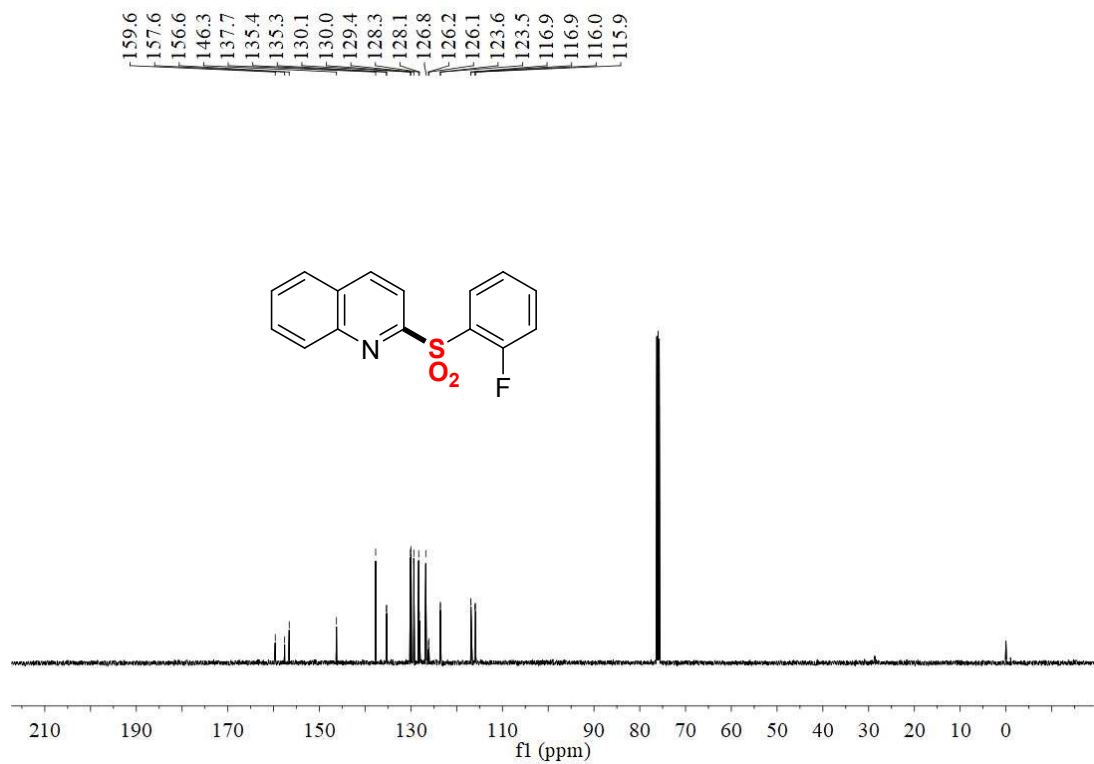

### 3m <sup>1</sup>H NMR

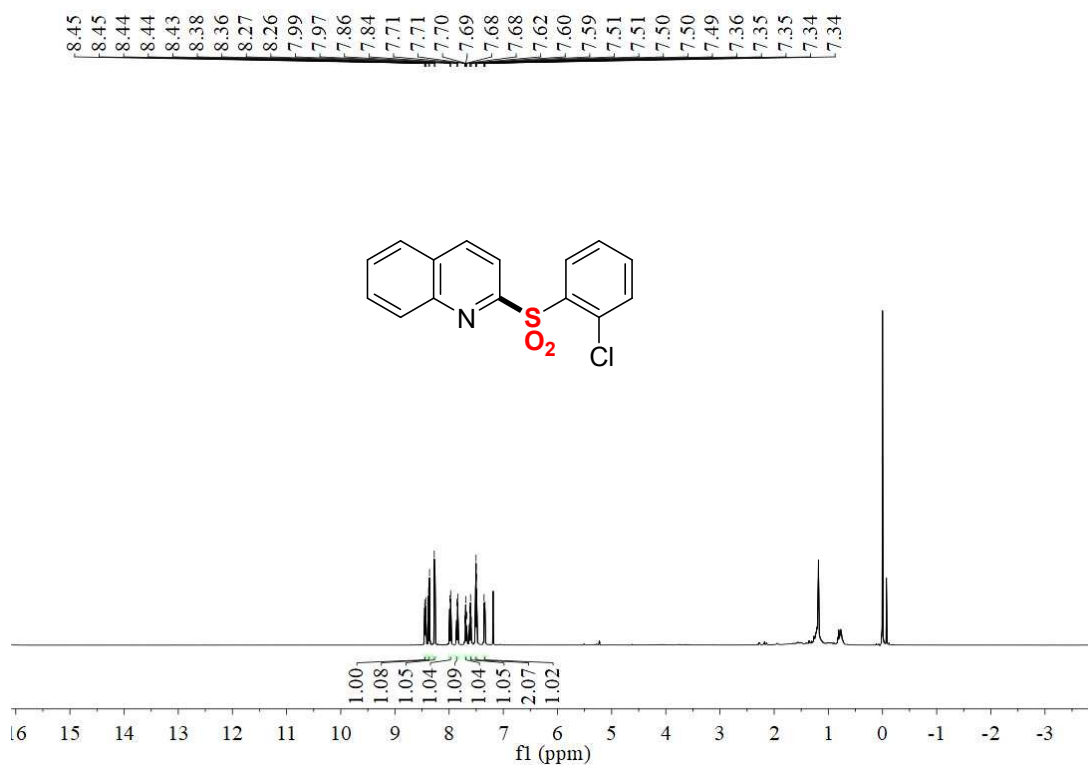

### 3m <sup>13</sup>C NMR

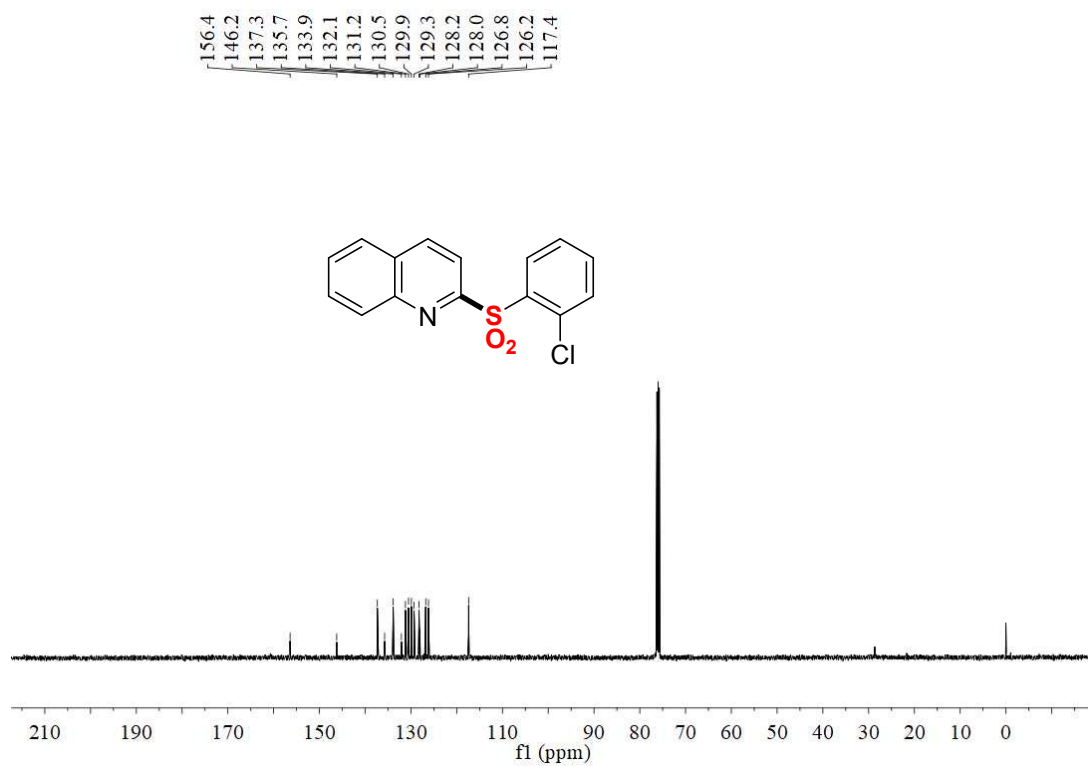



### 3n <sup>1</sup>H NMR

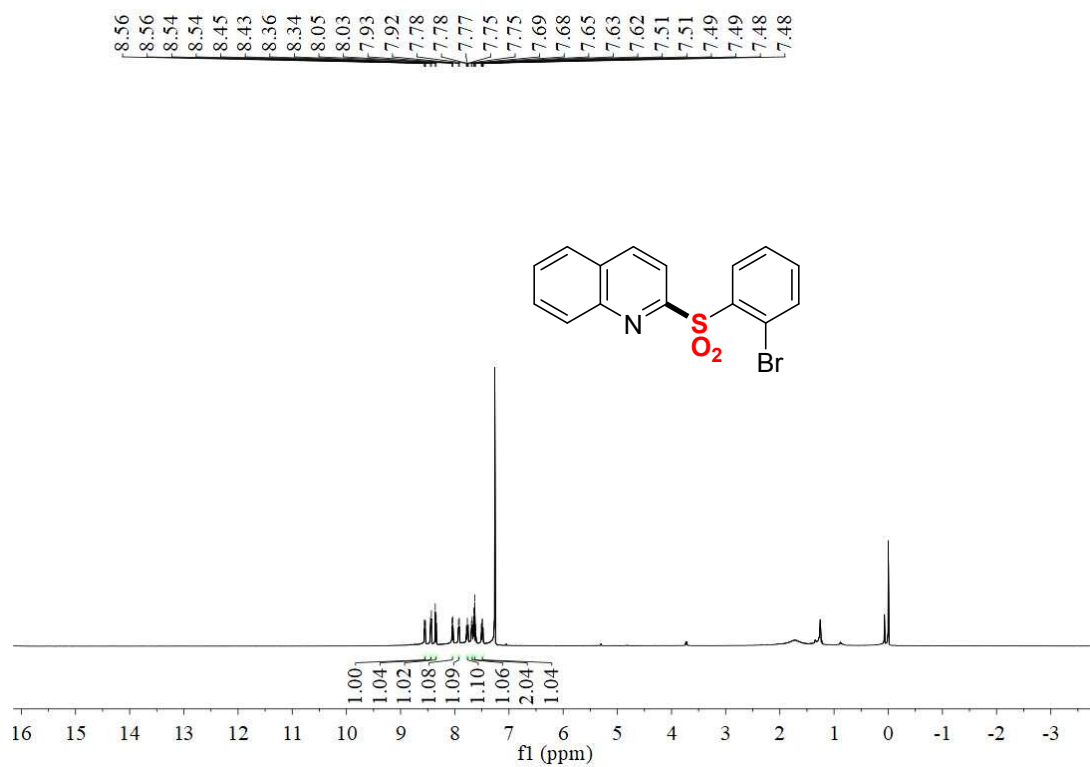

### 3n <sup>13</sup>C NMR

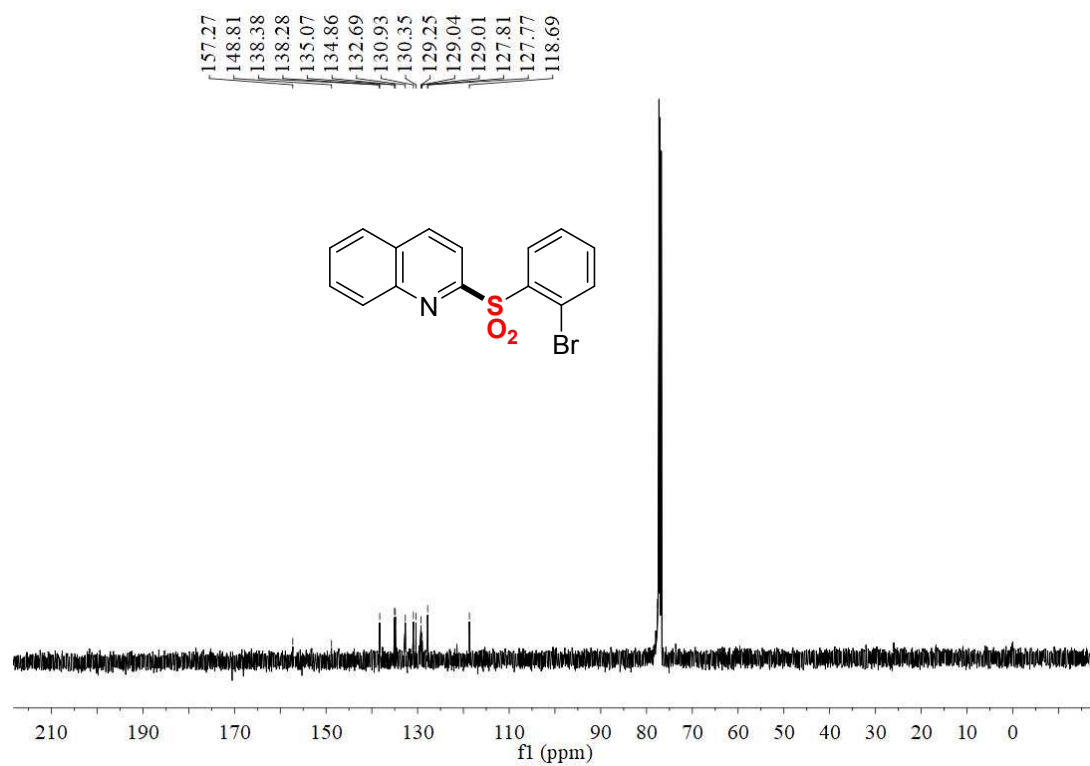

### 3o <sup>1</sup>H NMR

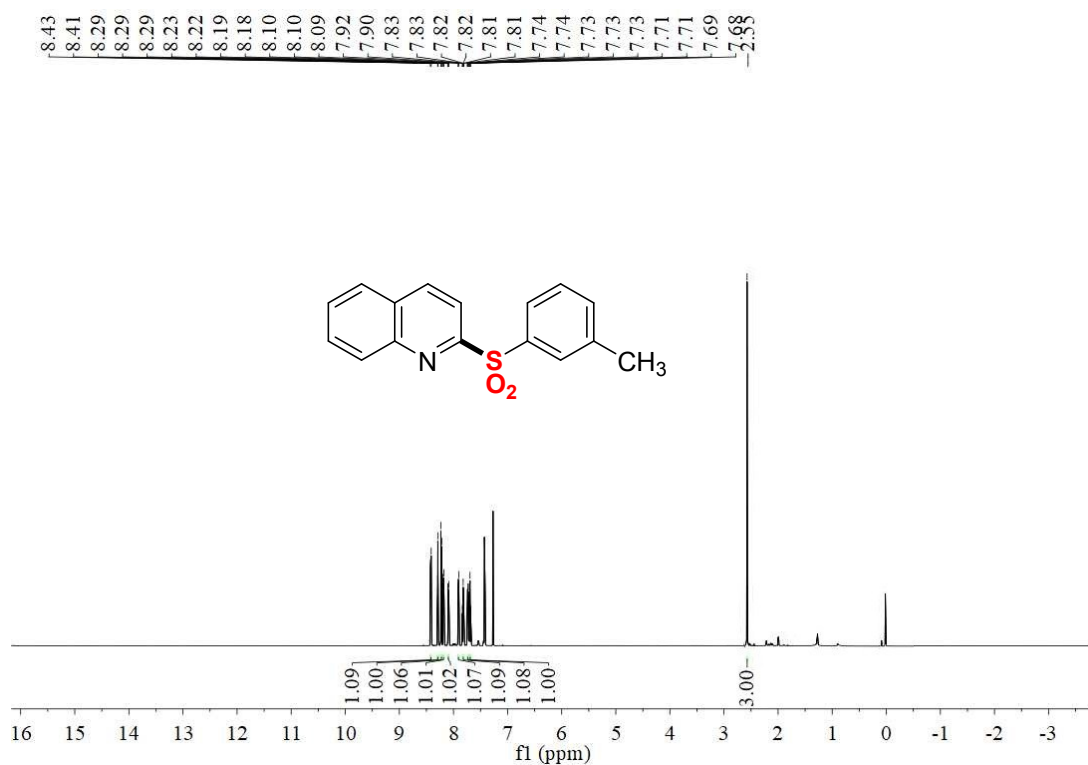

### 3o <sup>13</sup>C NMR

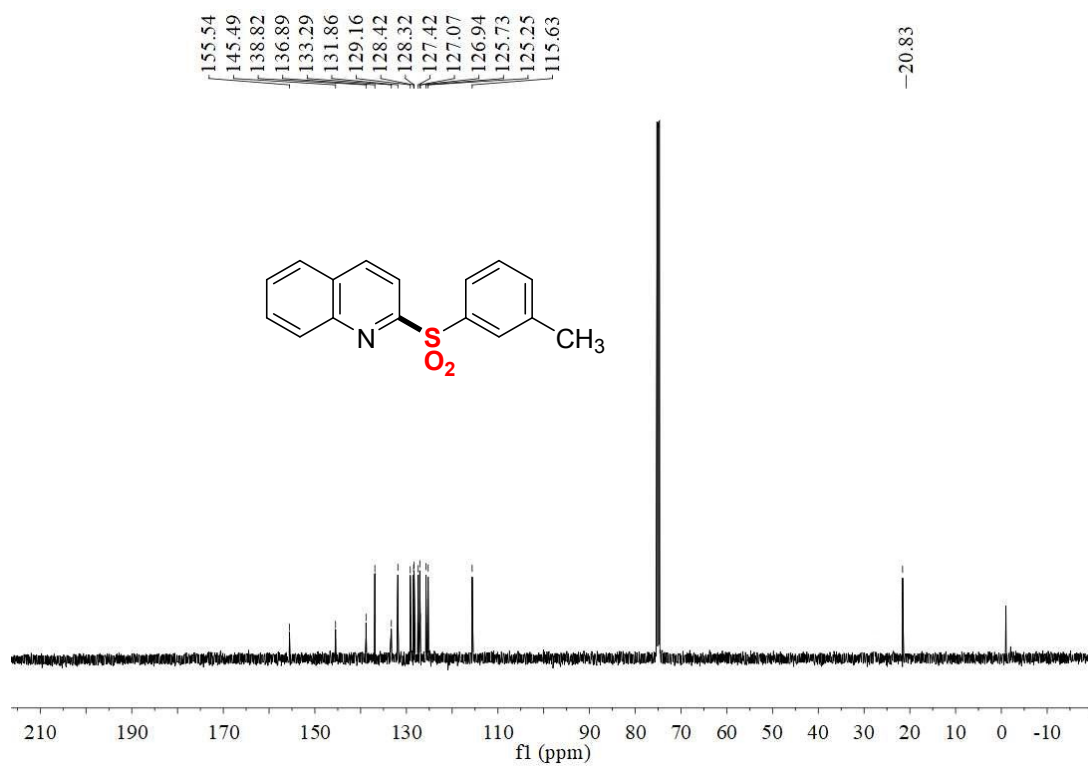

### 3p <sup>1</sup>H NMR

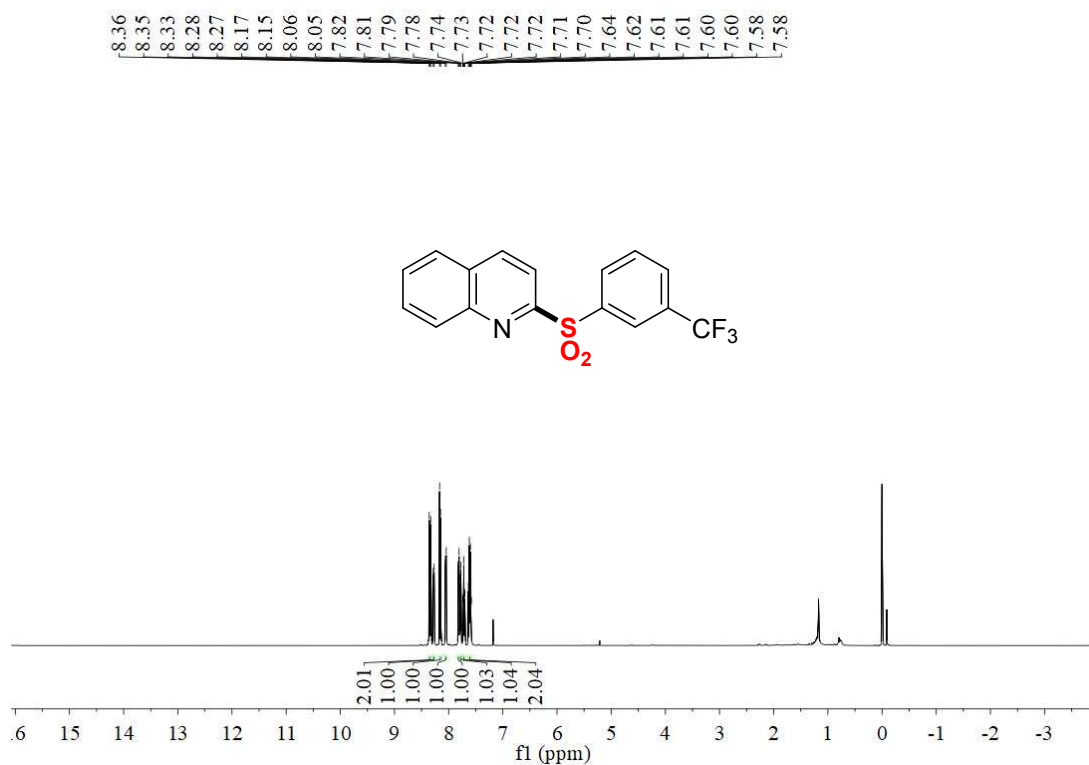

### 3p <sup>13</sup>C NMR

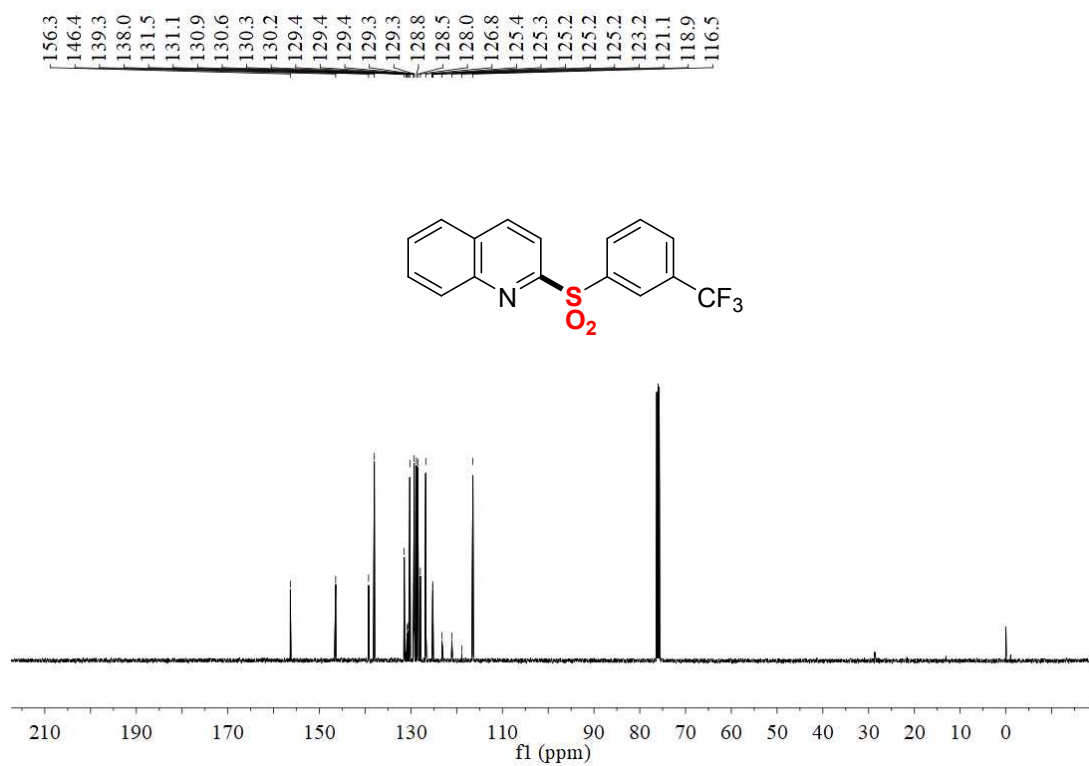

### 3q <sup>1</sup>H NMR

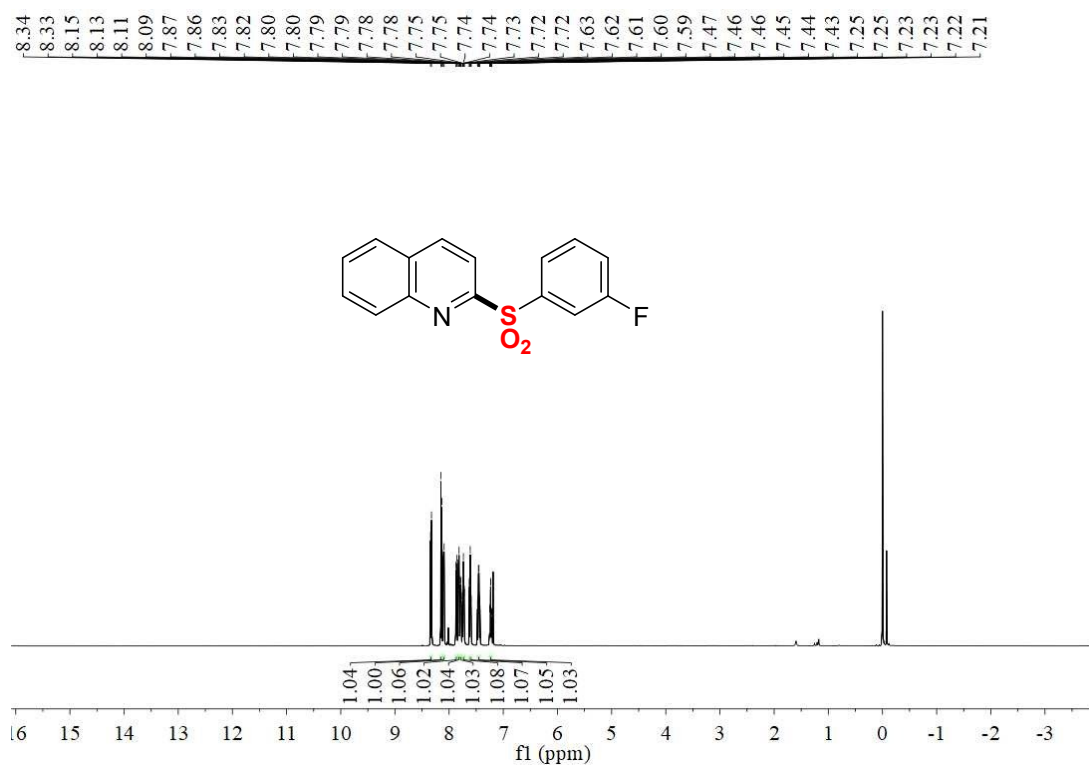

### 3q <sup>13</sup>C NMR

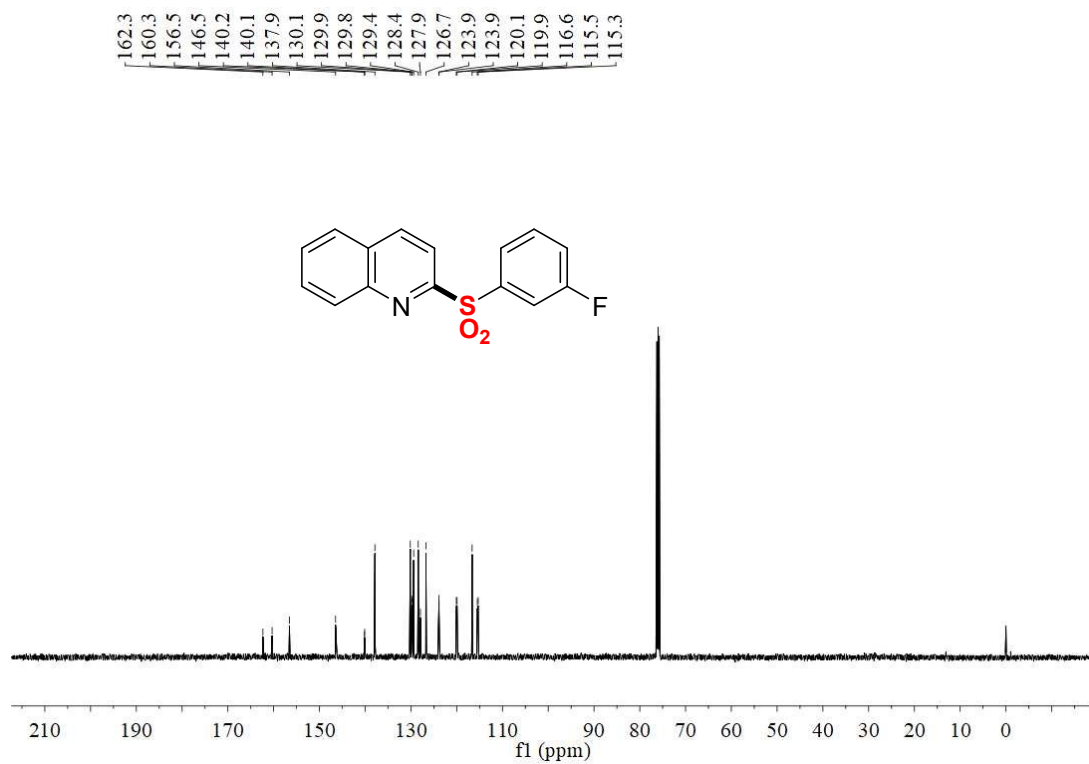

### 3r <sup>1</sup>H NMR

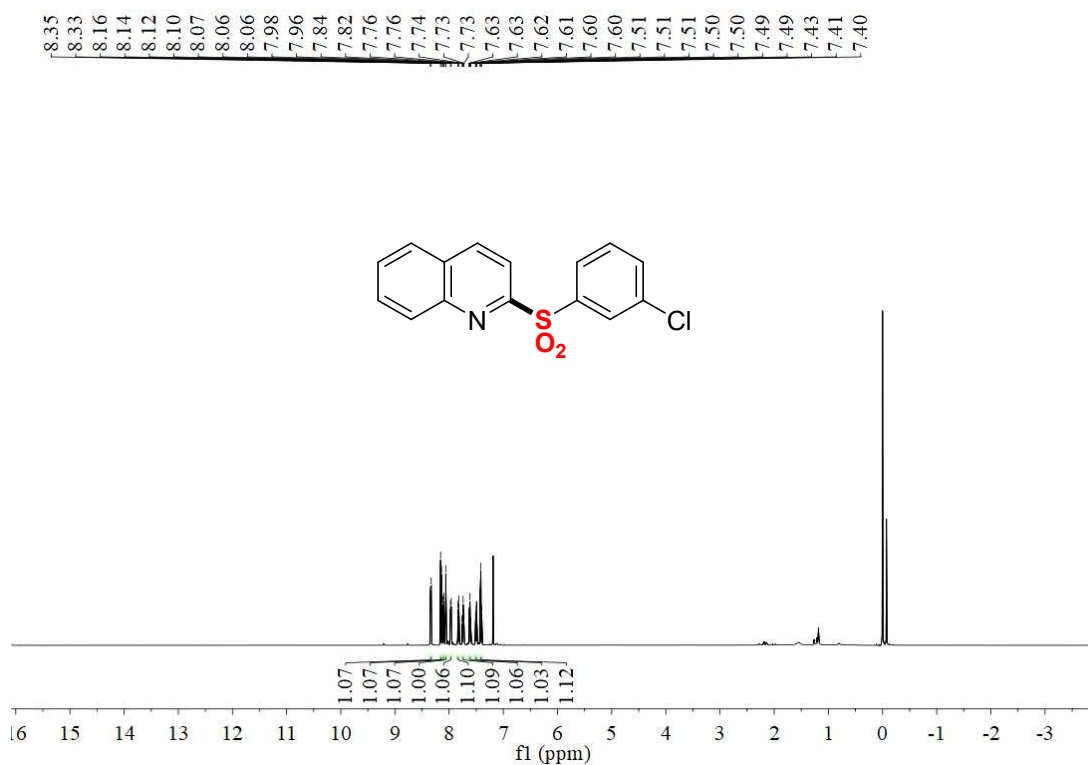

### 3r <sup>13</sup>C NMR

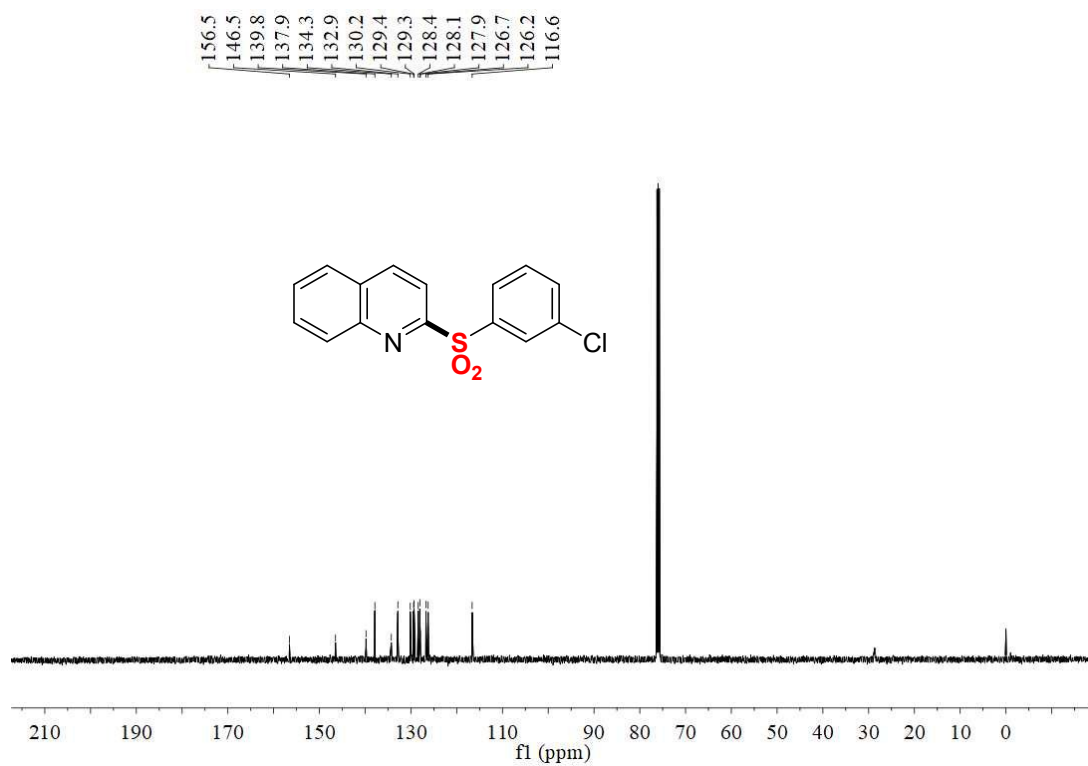

### 3s <sup>1</sup>H NMR

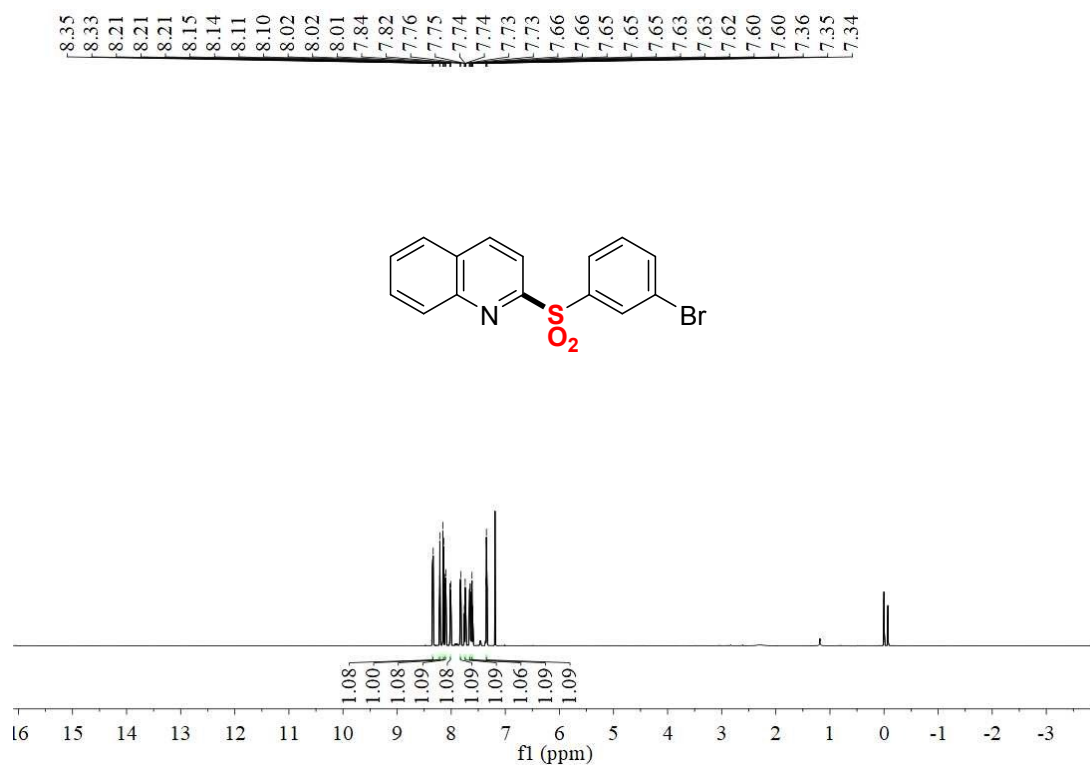

### 3s <sup>13</sup>C NMR

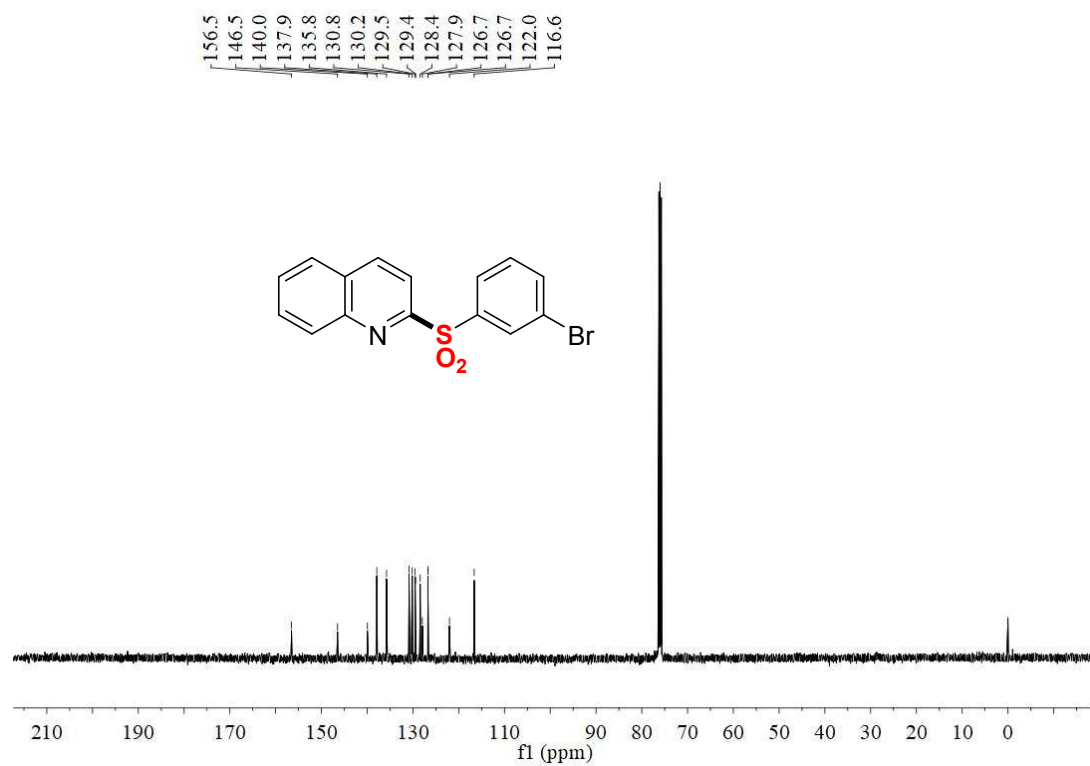

3t <sup>1</sup>H NMR

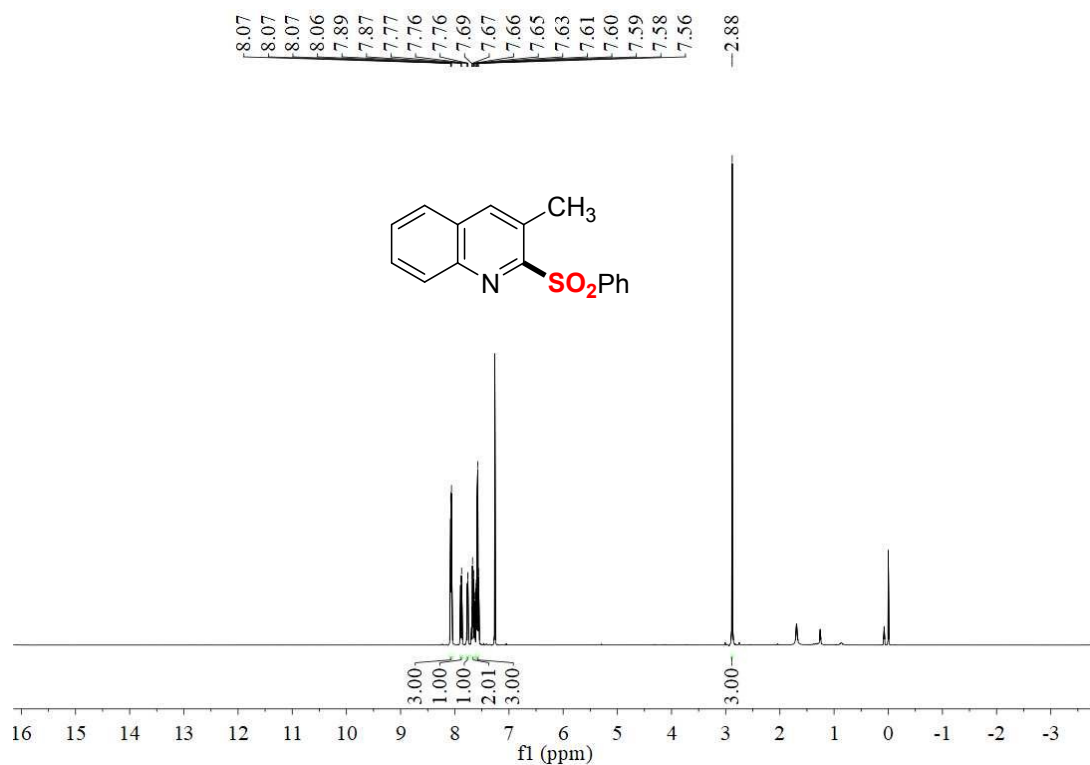

3t <sup>13</sup>C NMR

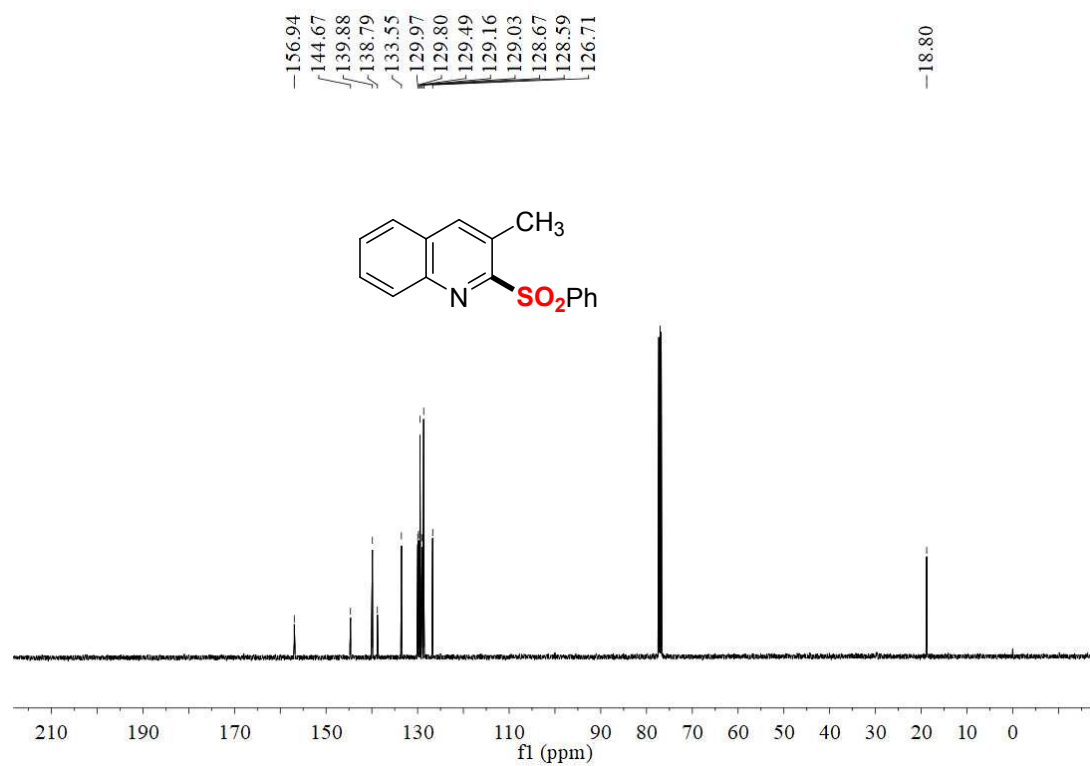

### 3u <sup>1</sup>H NMR

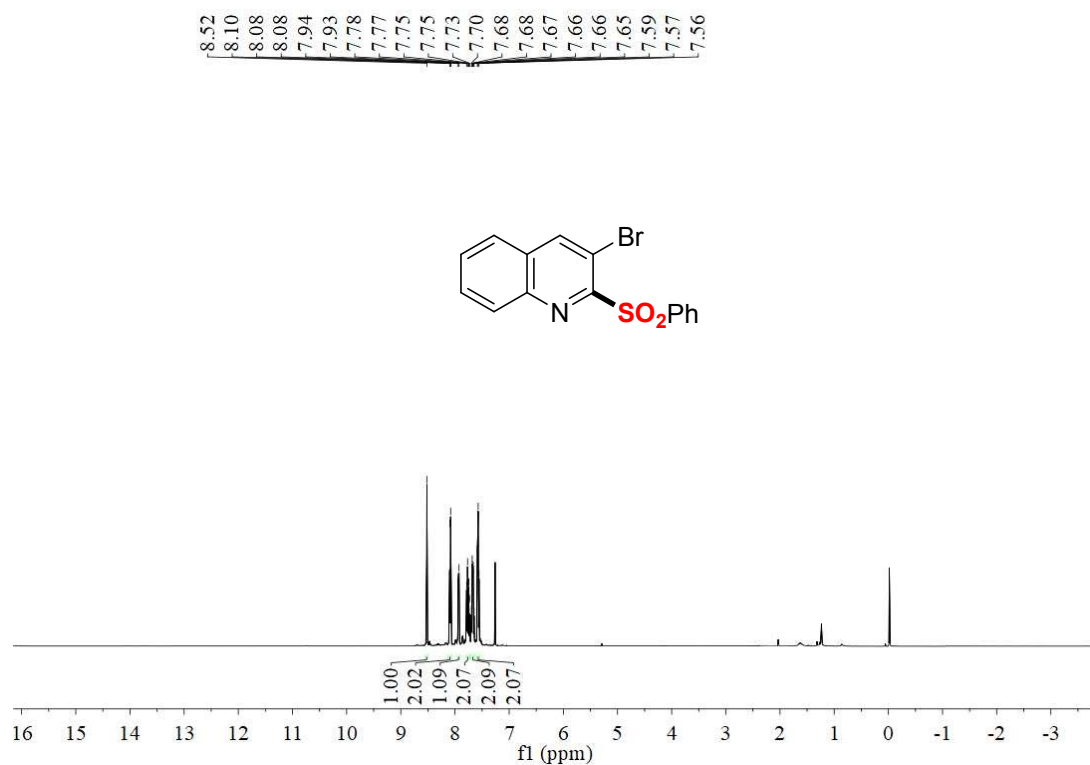

### 3u <sup>13</sup>C NMR

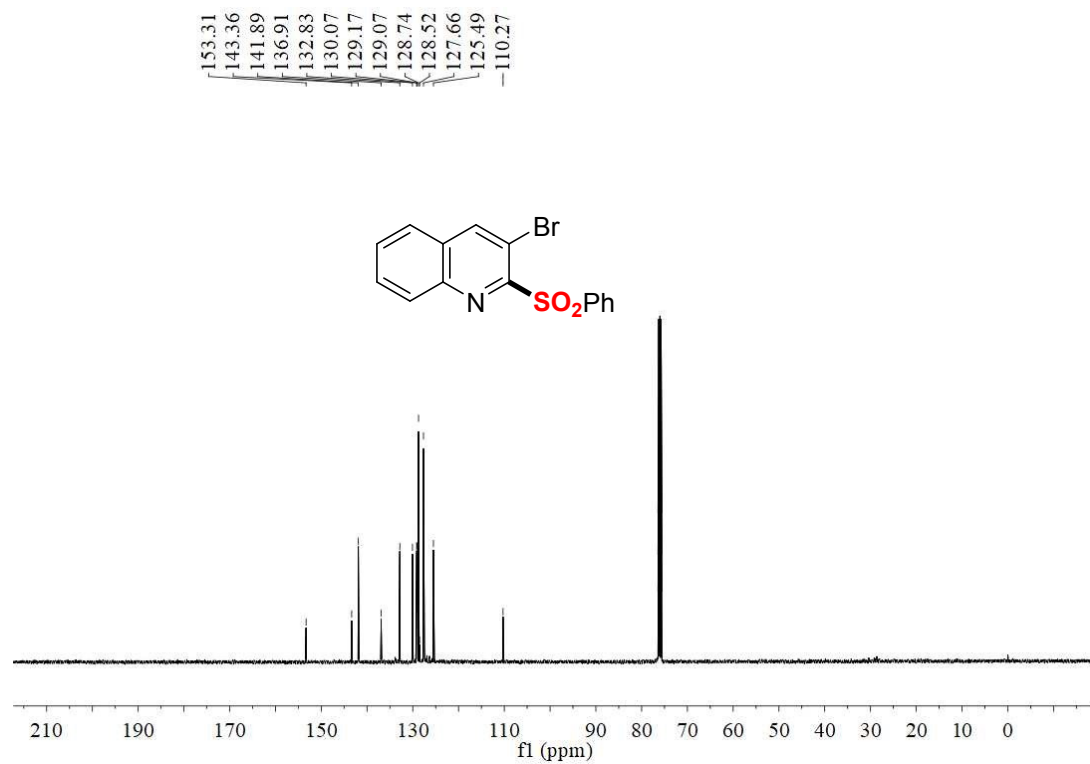



### 3v <sup>1</sup>H NMR

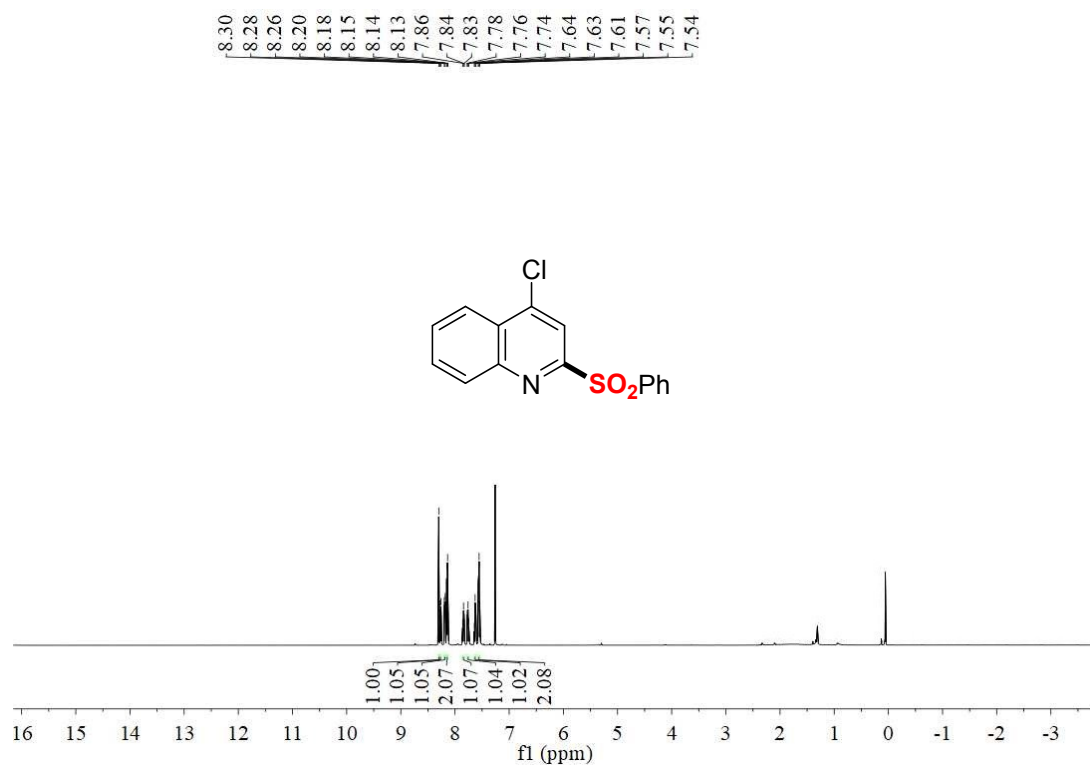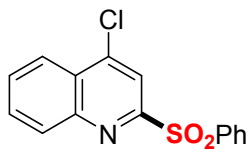

### 3v <sup>13</sup>C NMR

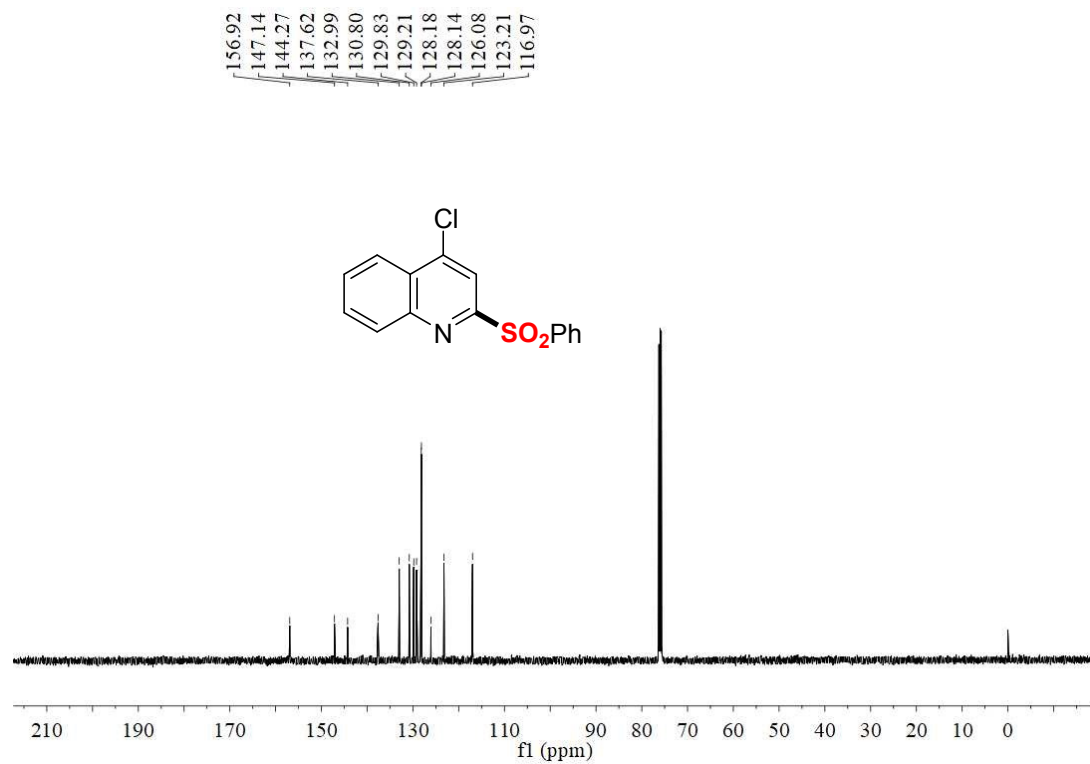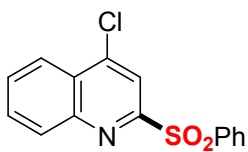

### 3w <sup>1</sup>H NMR

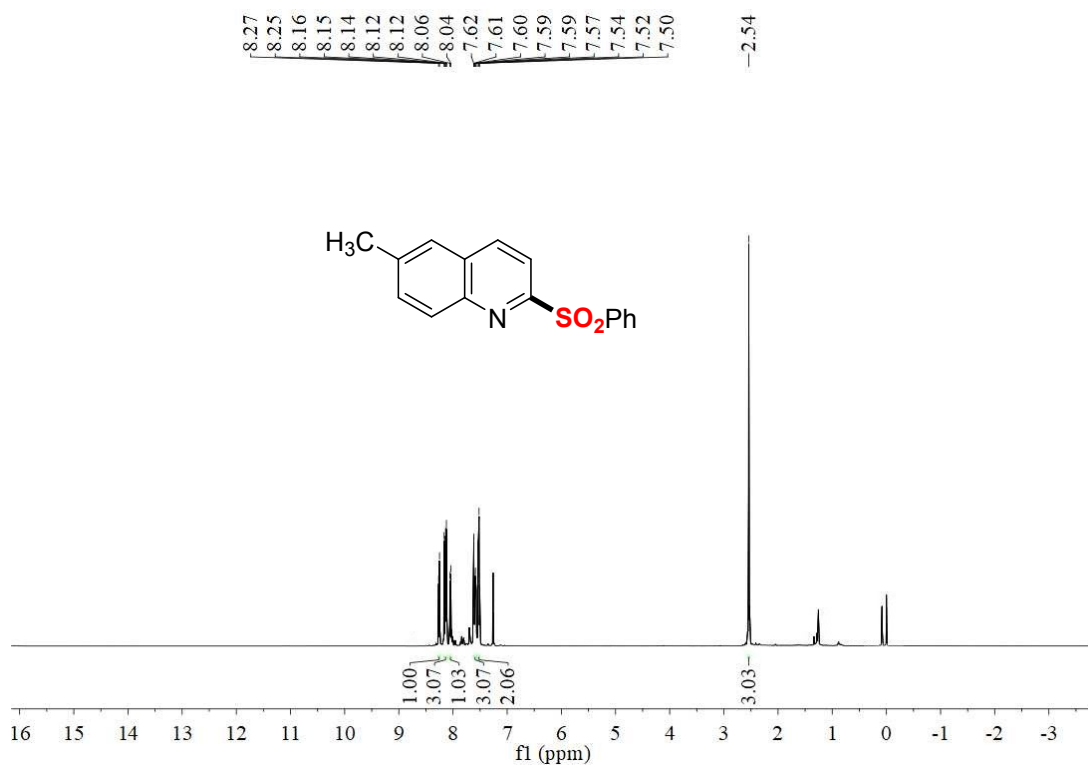

### 3w <sup>13</sup>C NMR

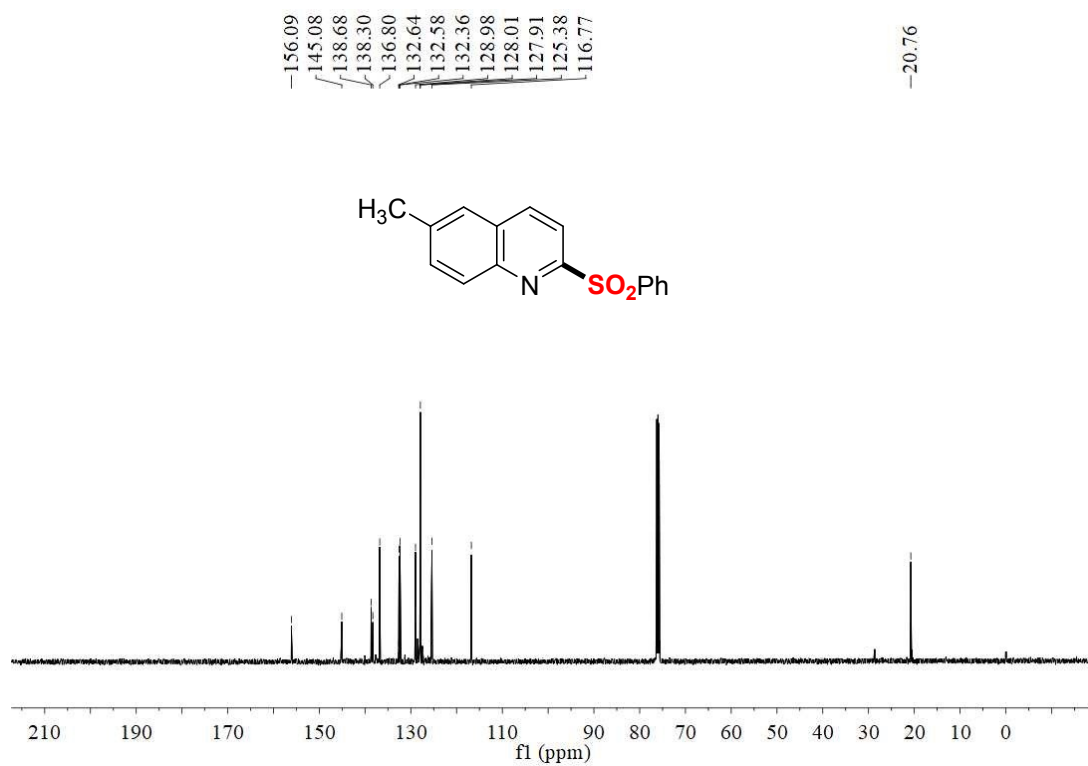

### 3x <sup>1</sup>H NMR

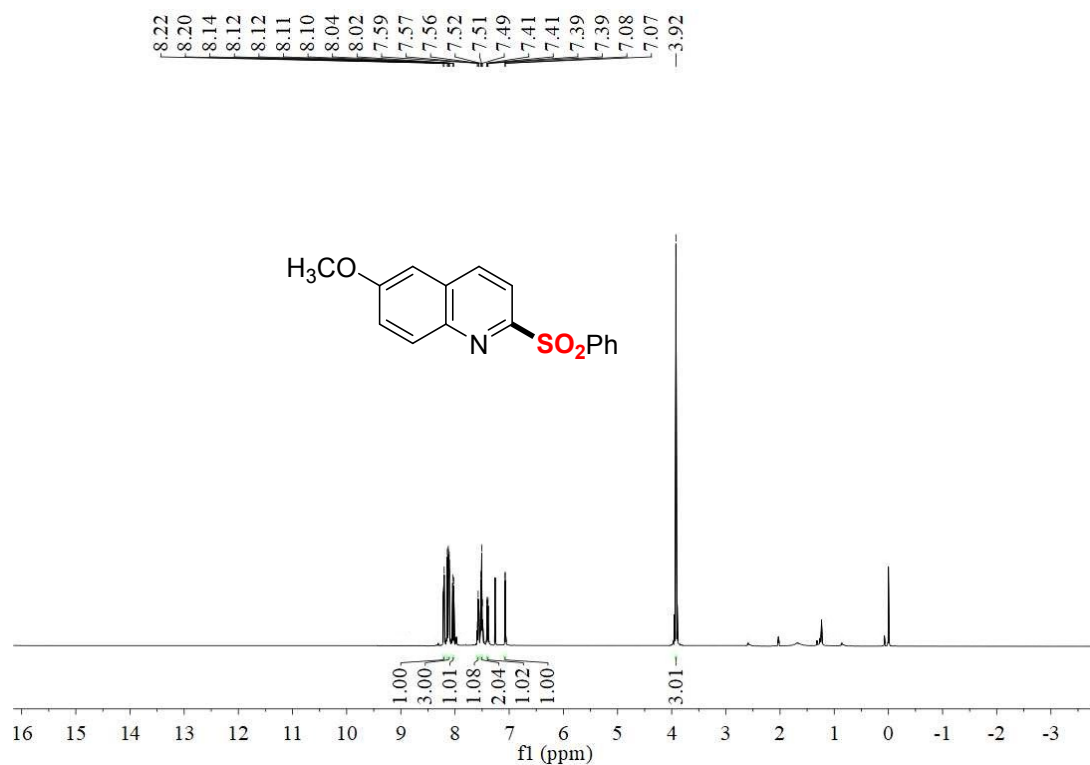

### 3x <sup>13</sup>C NMR

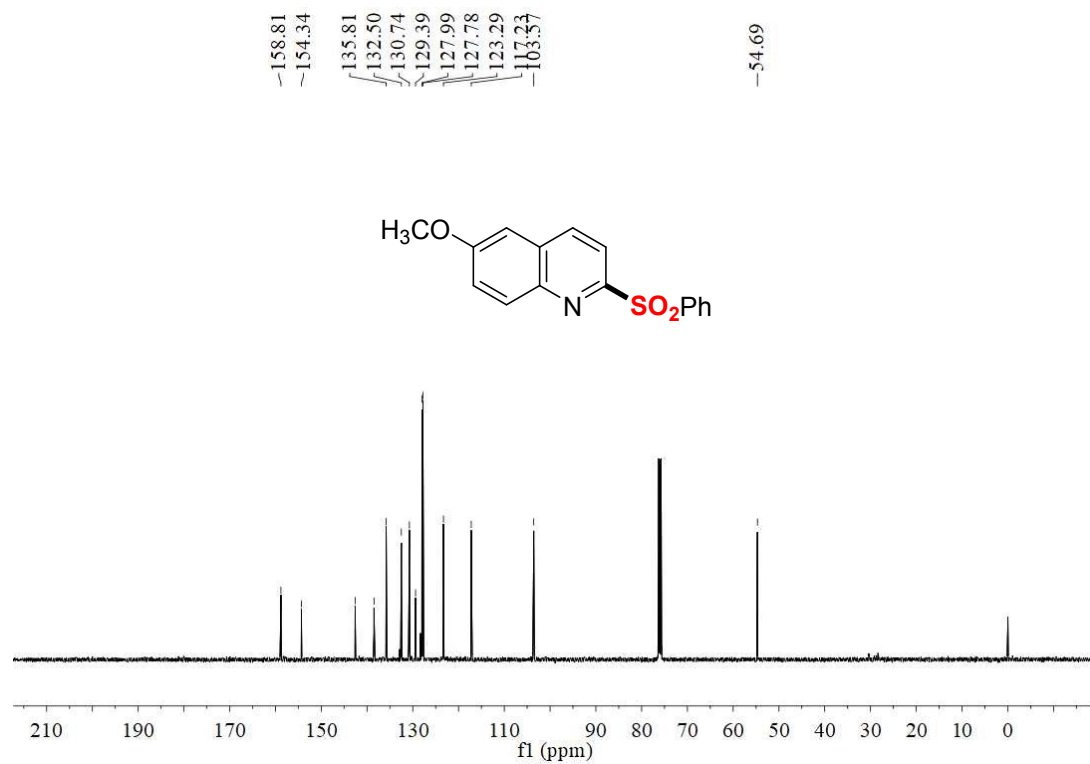

### 3y <sup>1</sup>H NMR

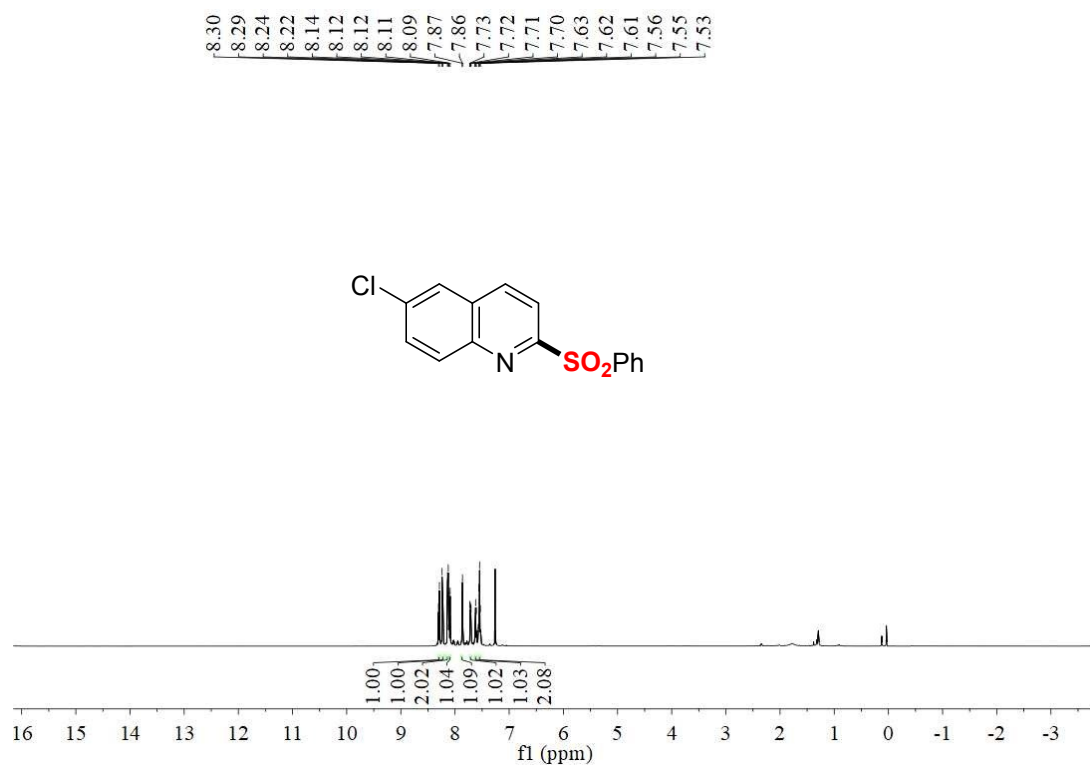

### 3y <sup>13</sup>C NMR

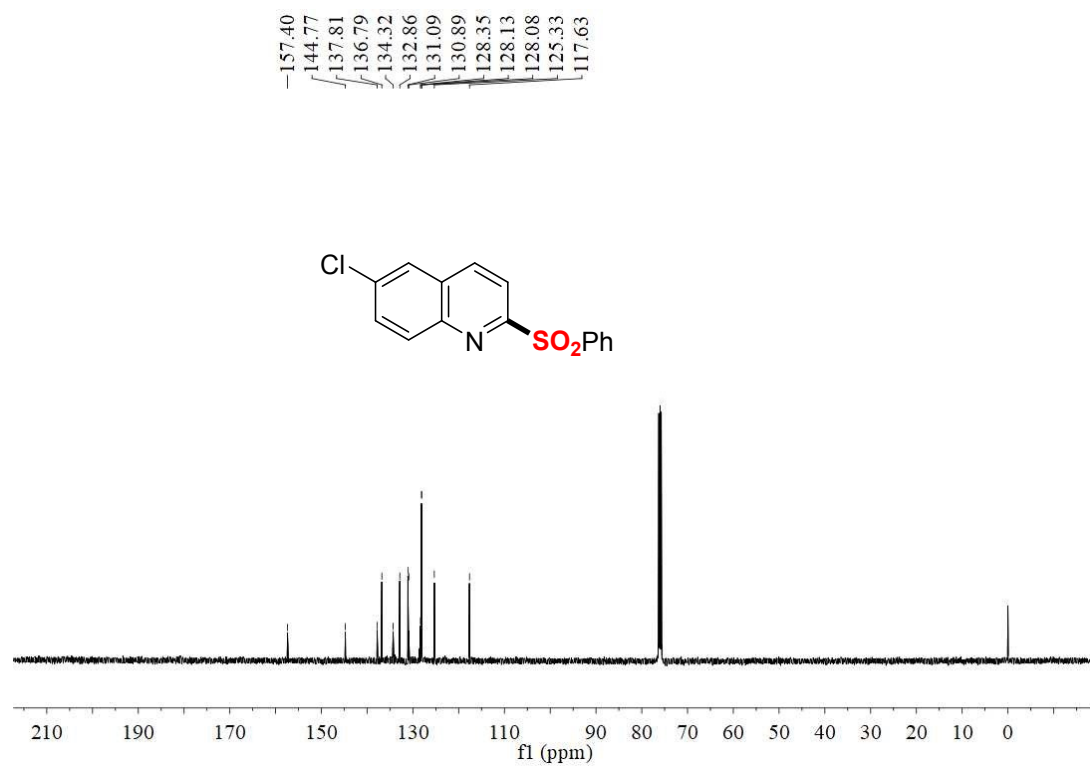

3z <sup>1</sup>H NMR

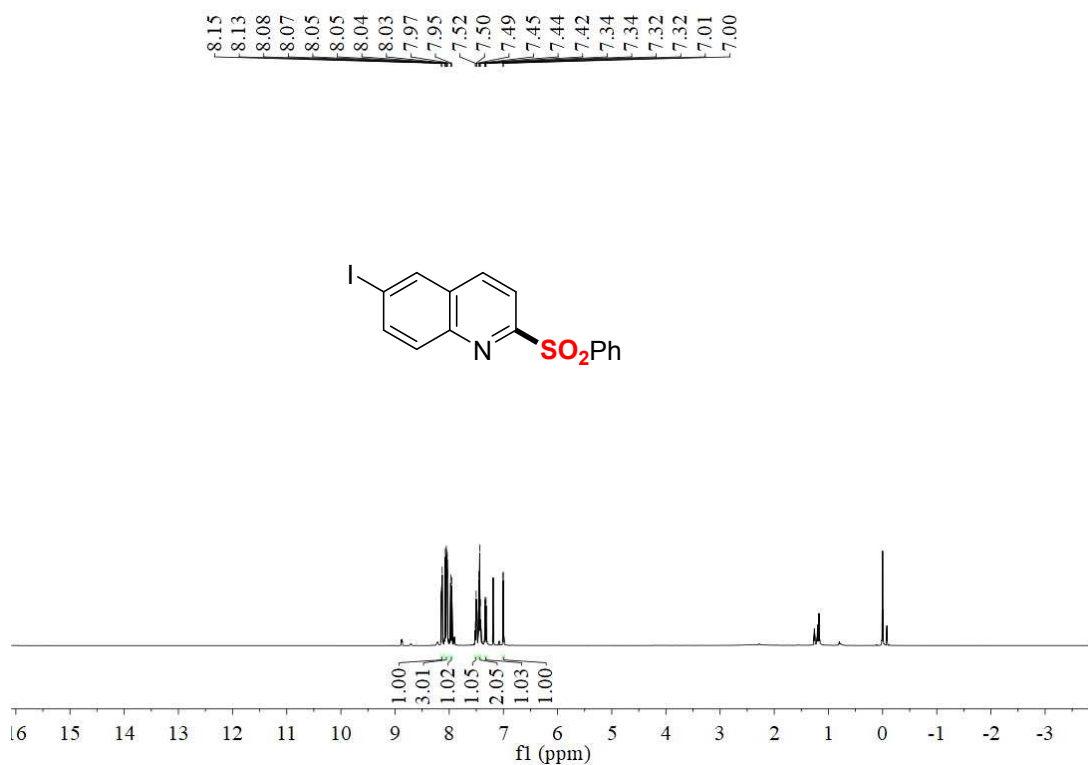

3z <sup>13</sup>C NMR

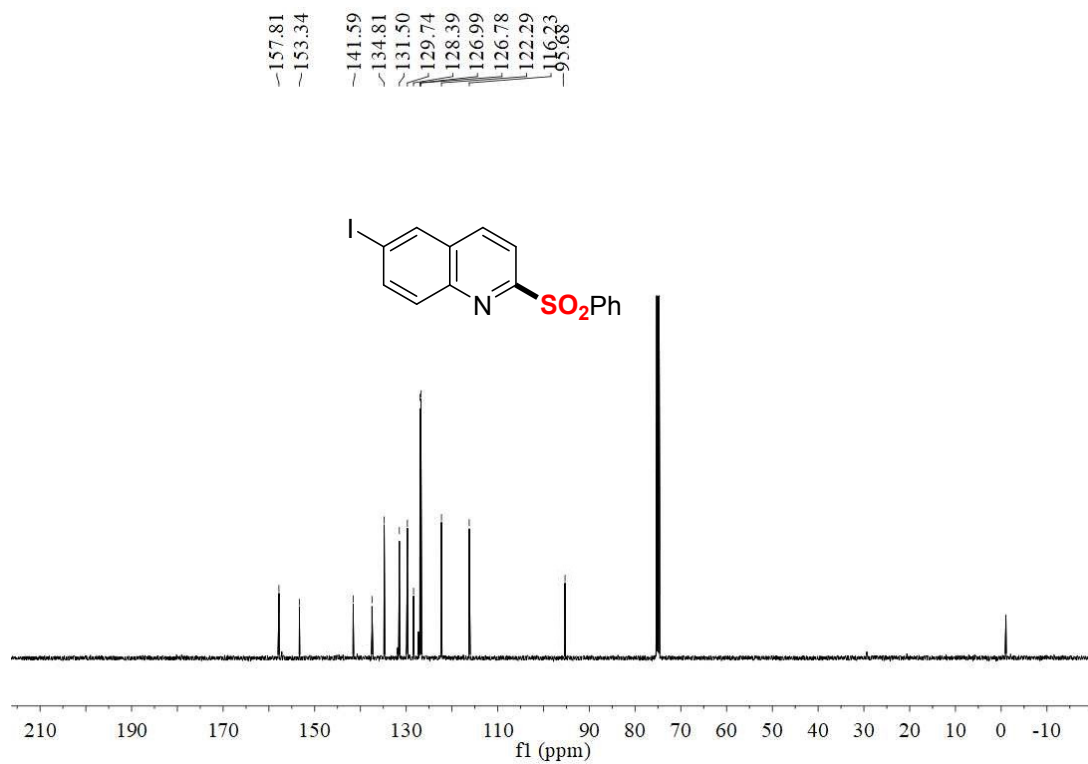

### 3aa <sup>1</sup>H NMR

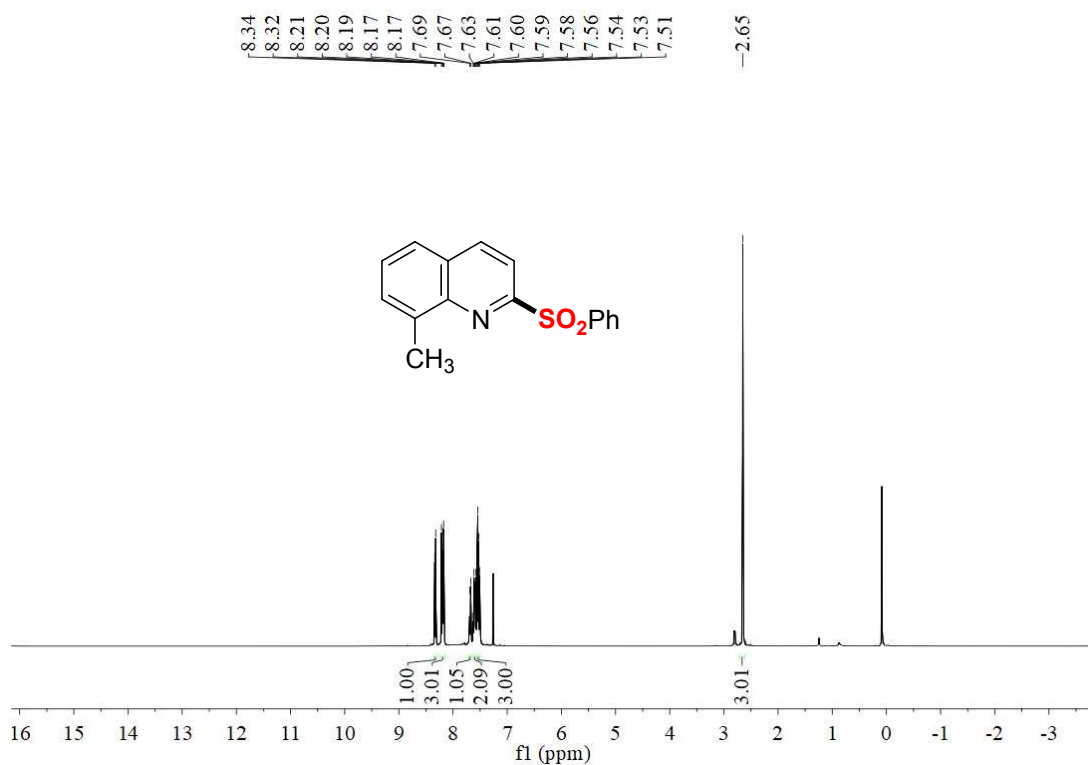

### 3aa <sup>13</sup>C NMR

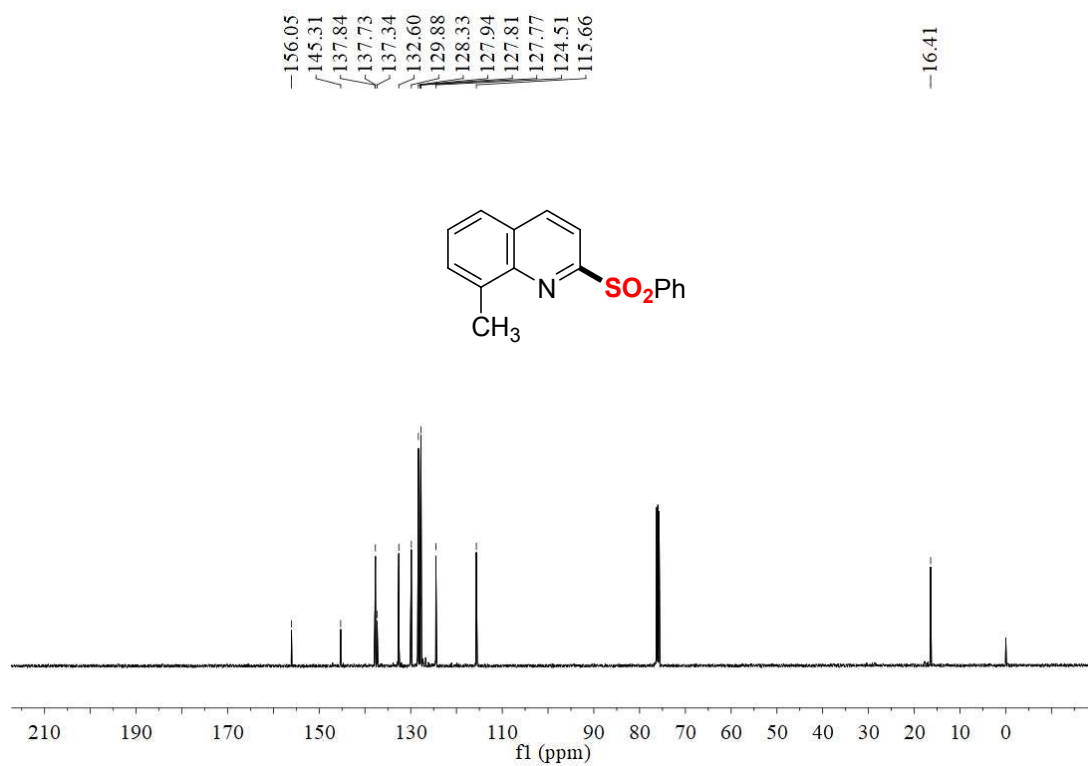

### 3ab <sup>1</sup>H NMR

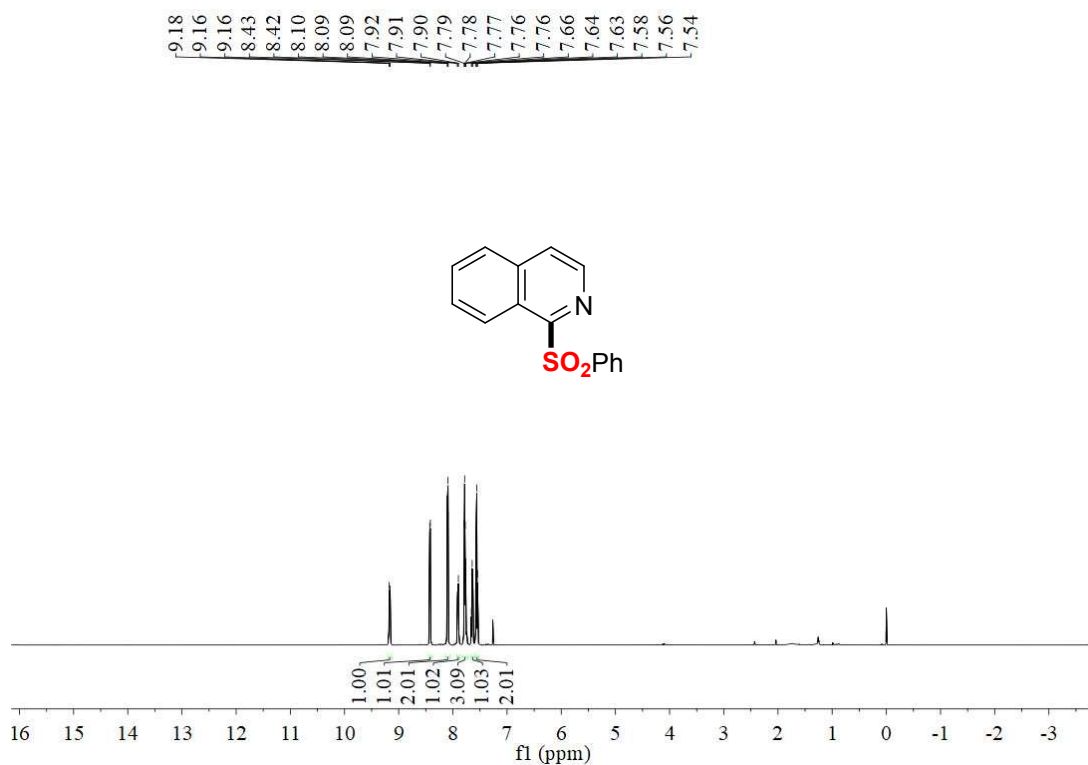

### 3ab <sup>13</sup>C NMR

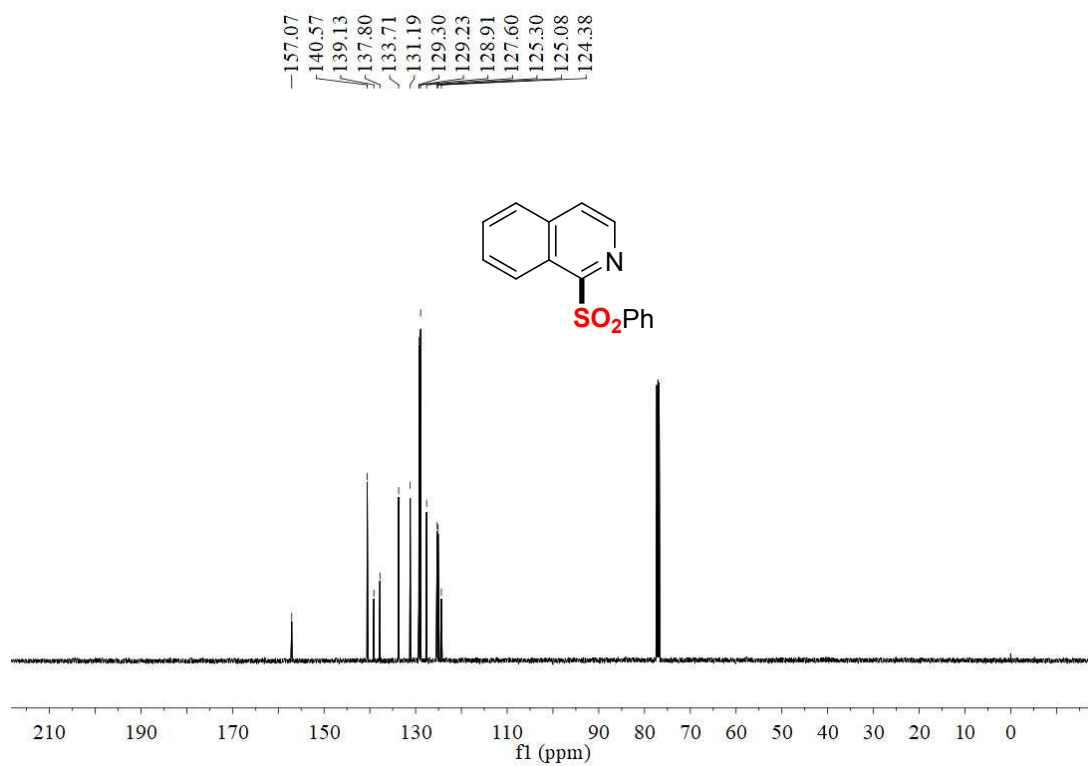

### 3ac <sup>1</sup>H NMR

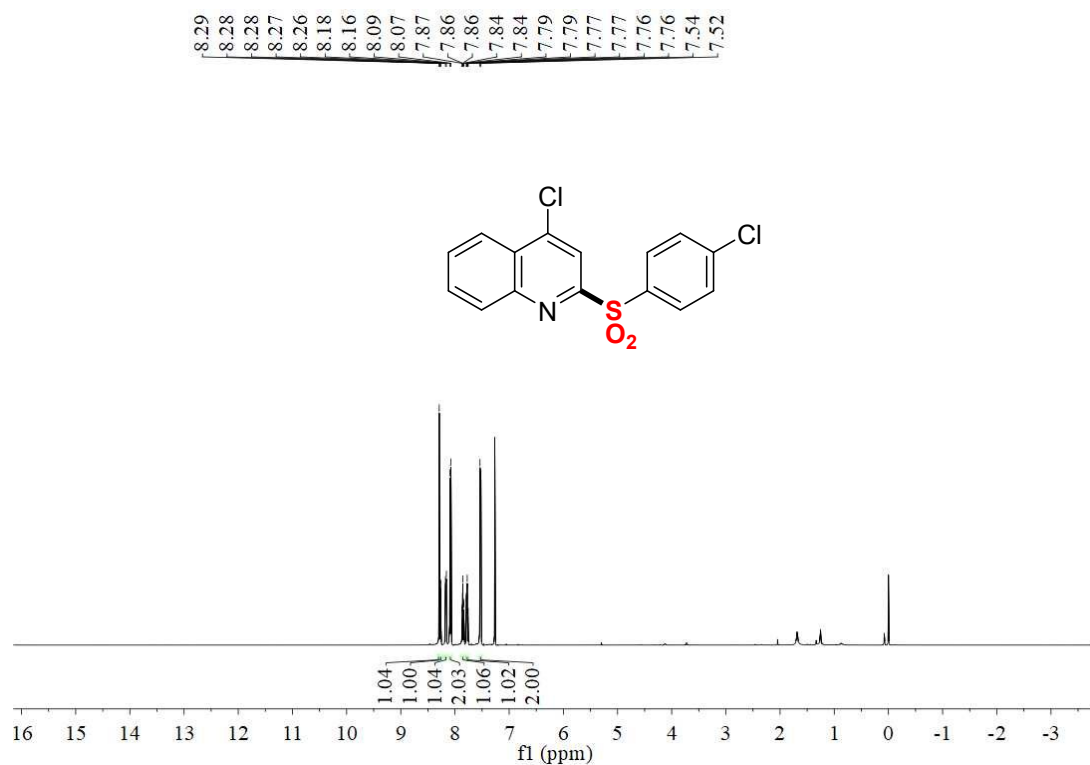

### 3ac <sup>13</sup>C NMR

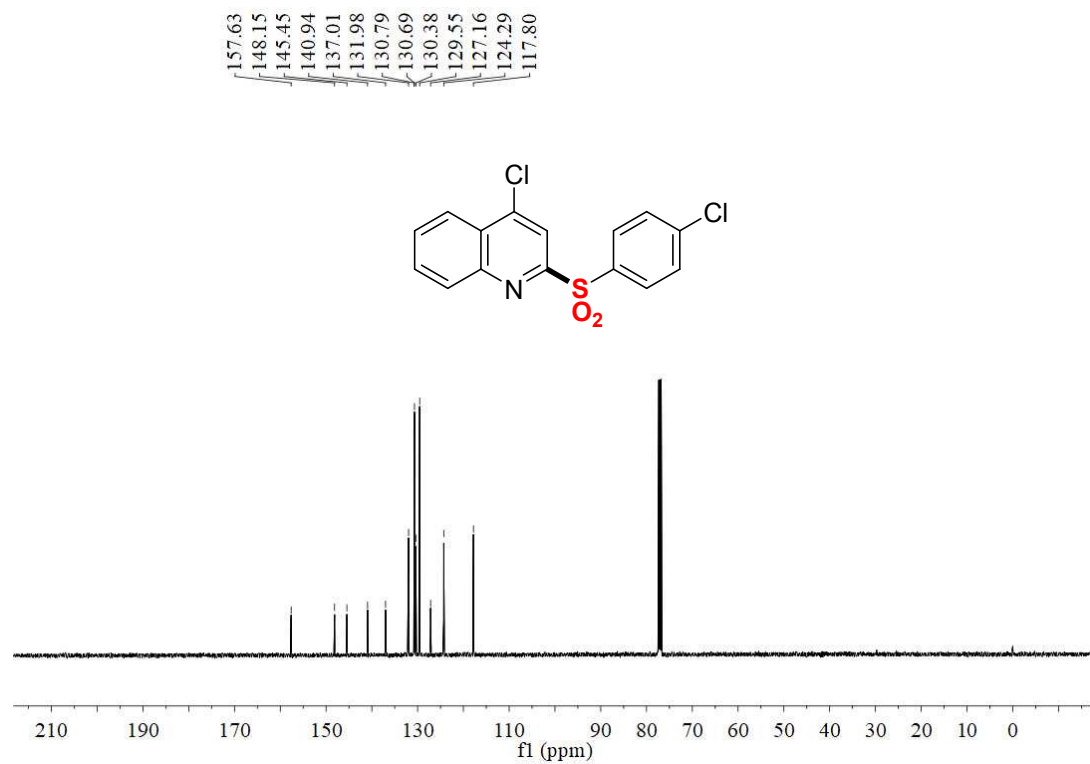



### 3ad <sup>1</sup>H NMR

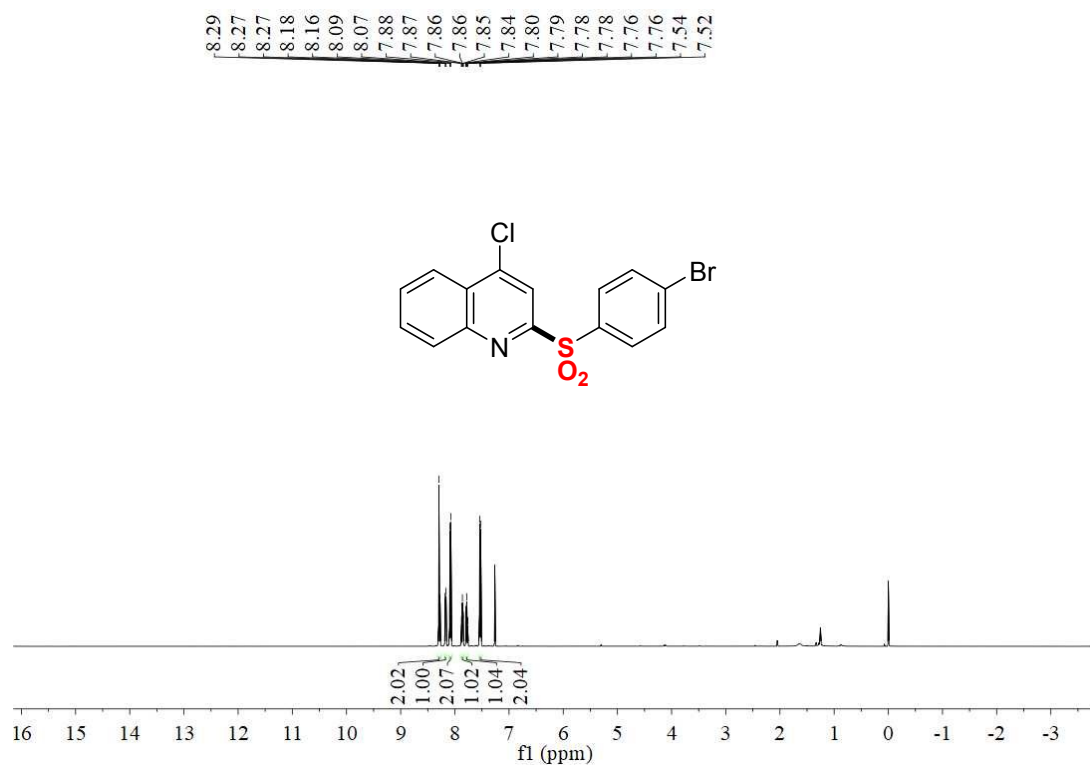

### 3ad <sup>13</sup>C NMR

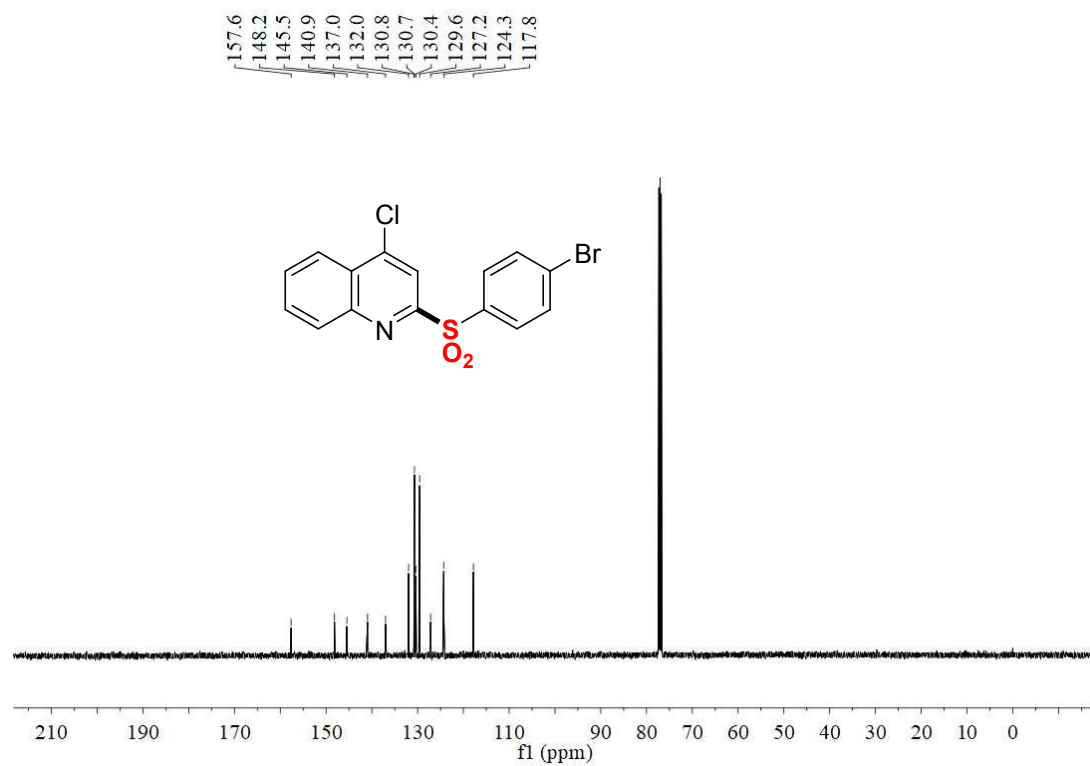

### 3ae <sup>1</sup>H NMR

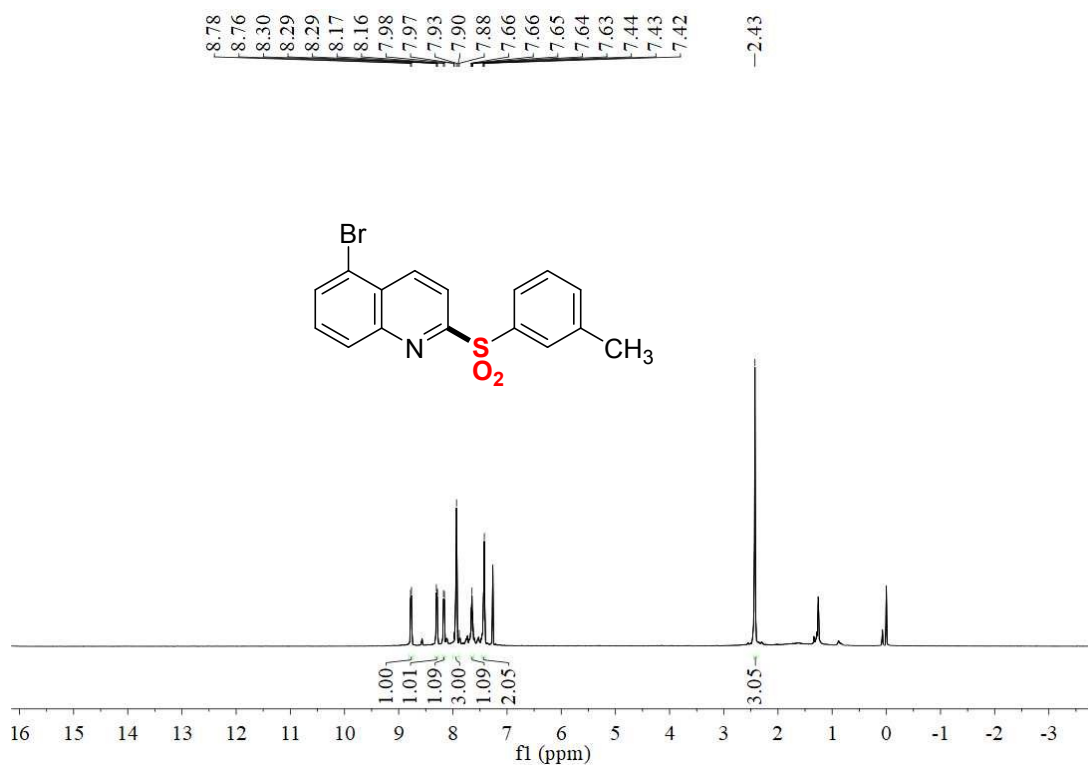

### 3ae <sup>13</sup>C NMR

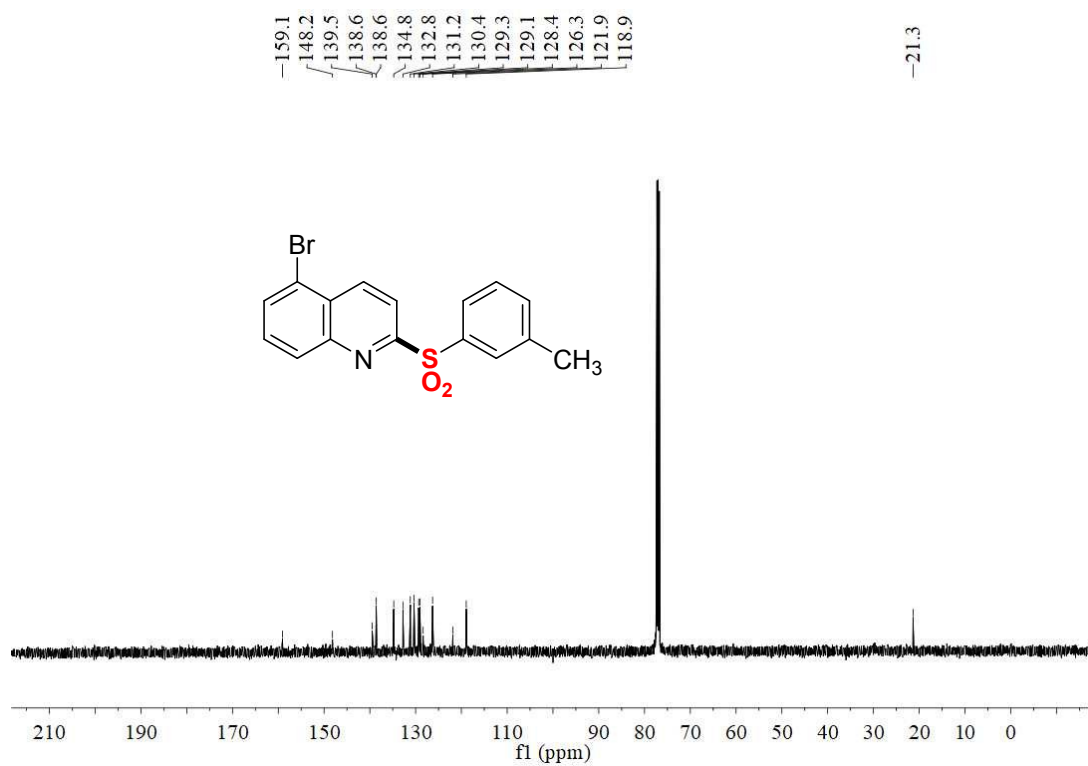

### 3af <sup>1</sup>H NMR

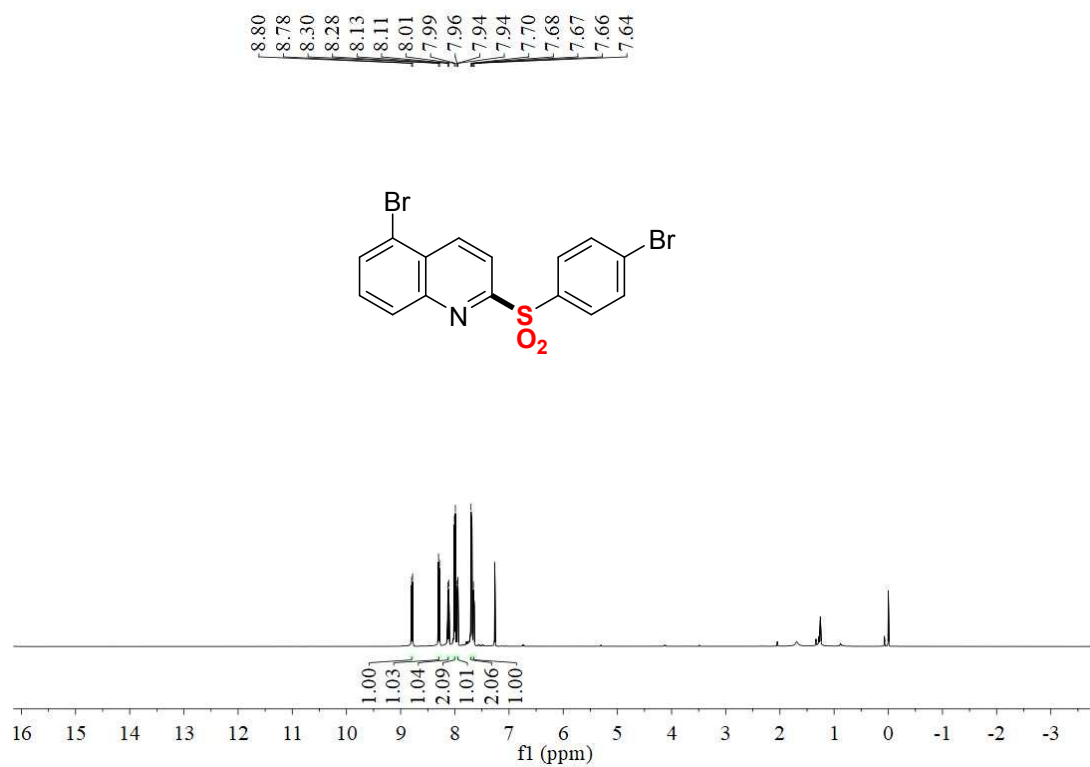

### 3af <sup>13</sup>C NMR

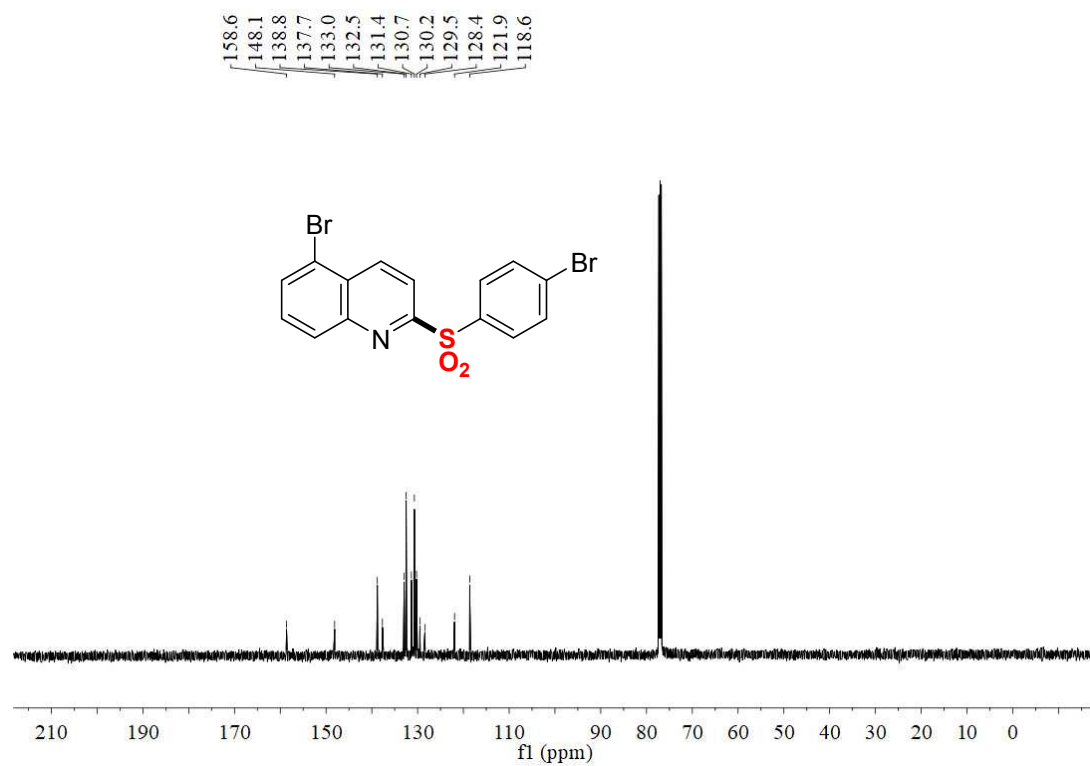

### 3ag <sup>1</sup>H NMR

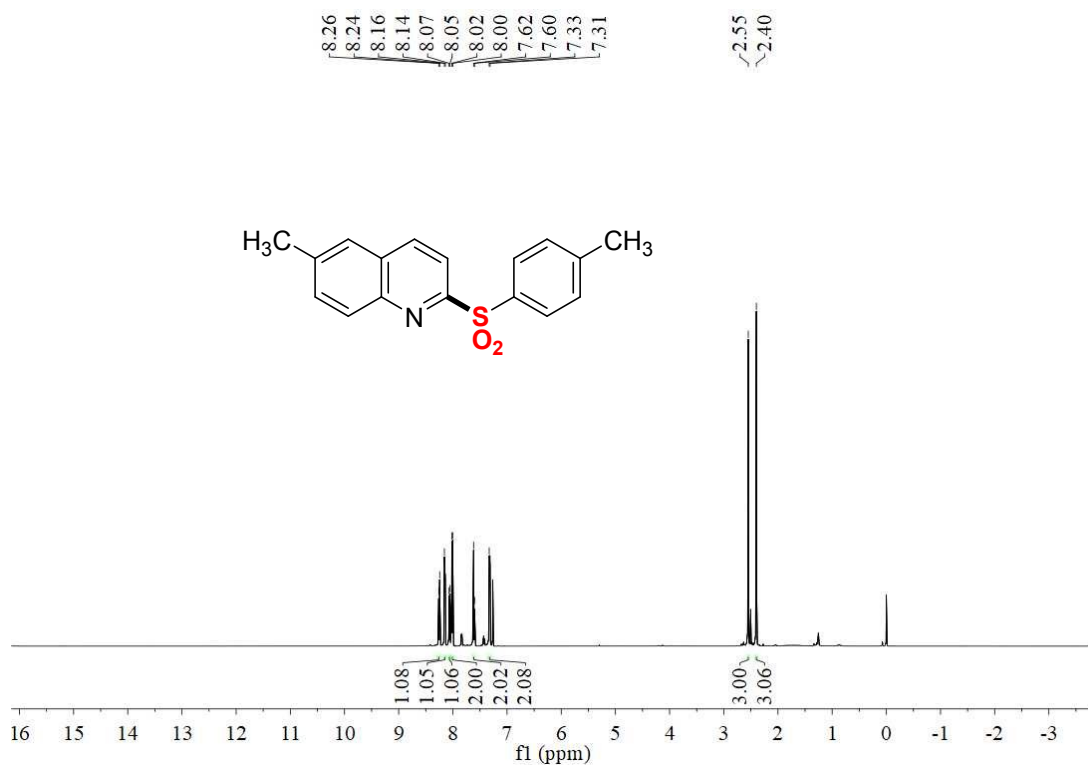

### 3ag <sup>13</sup>C NMR

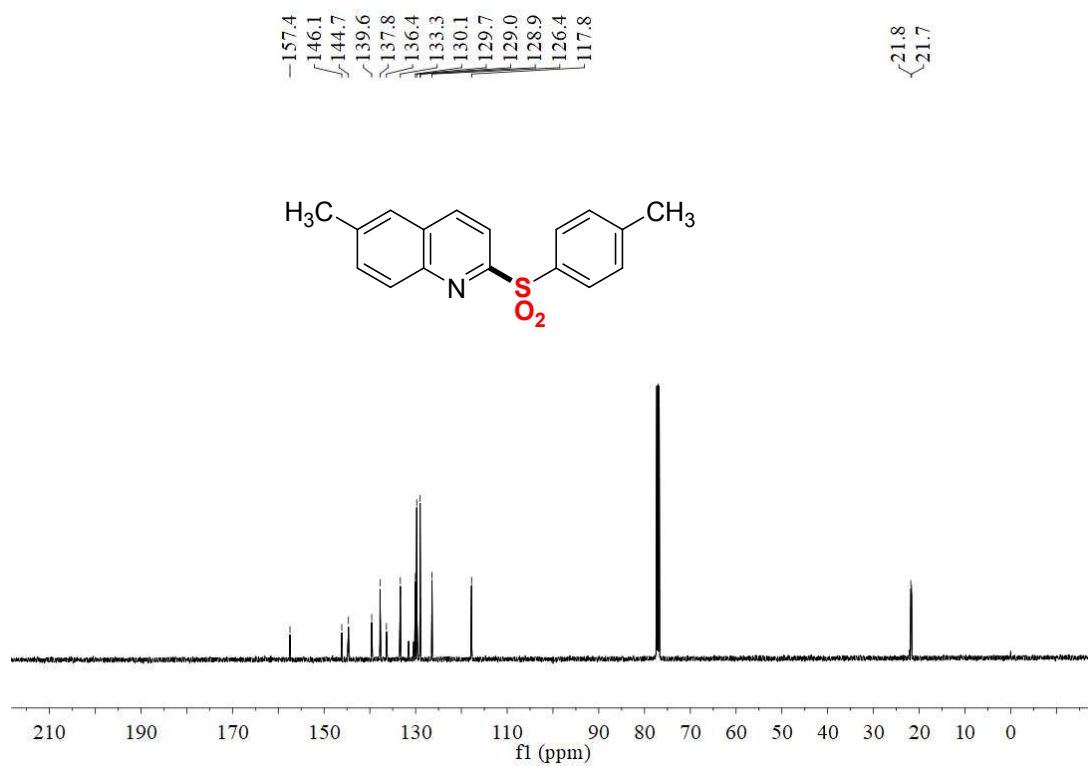

### 3ah <sup>1</sup>H NMR

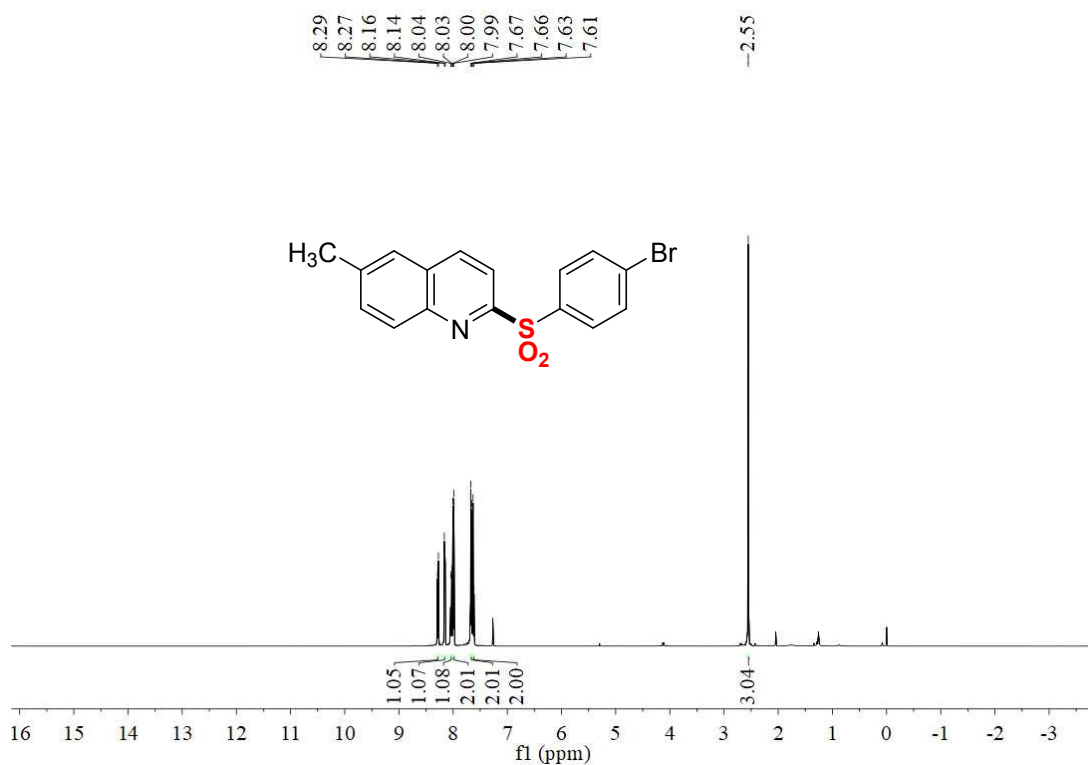

### 3ah <sup>13</sup>C NMR

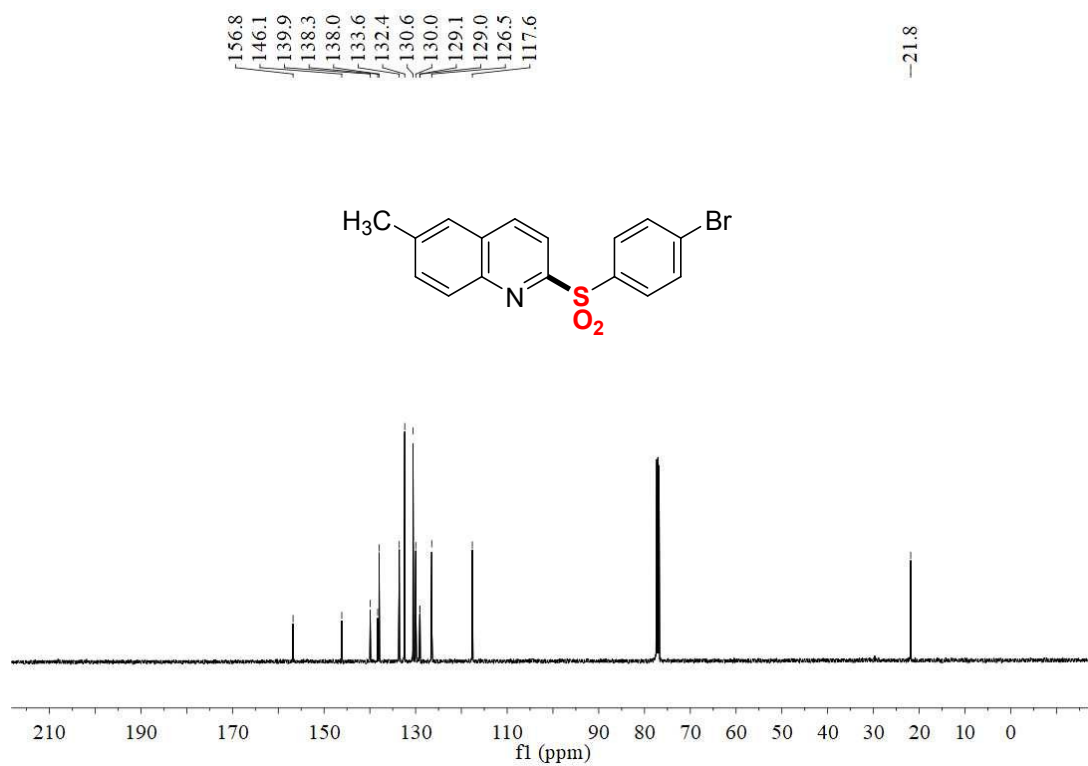

### 3ai <sup>1</sup>H NMR

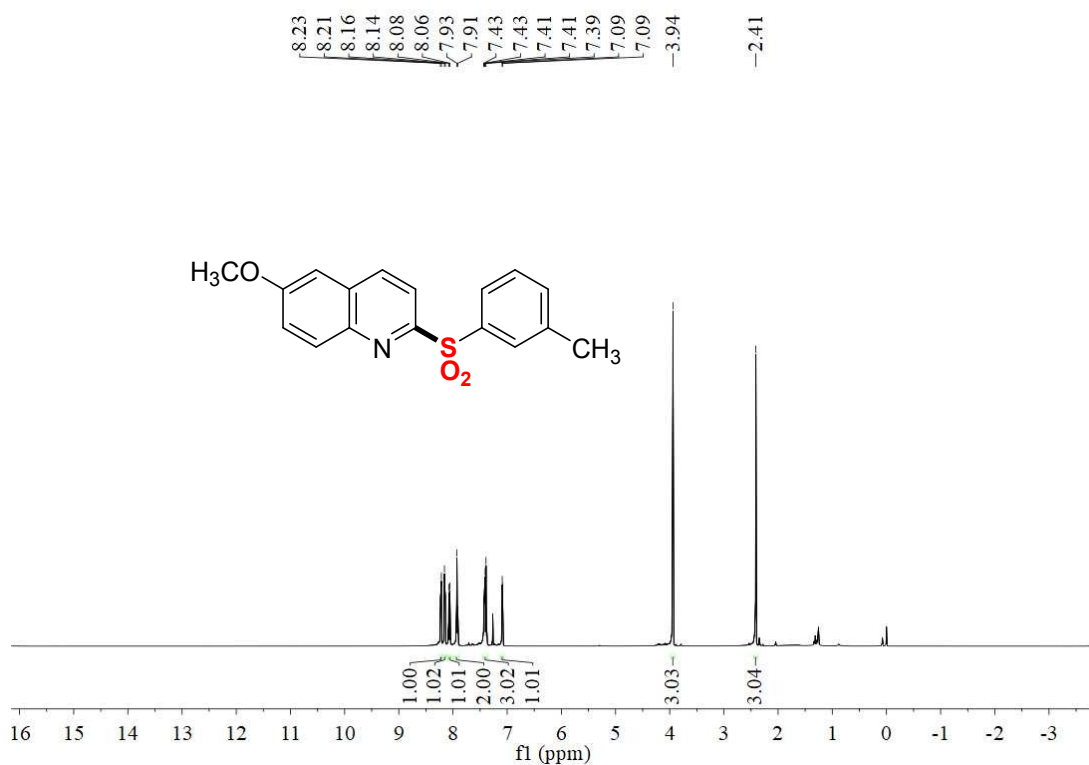

### 3ai <sup>13</sup>C NMR

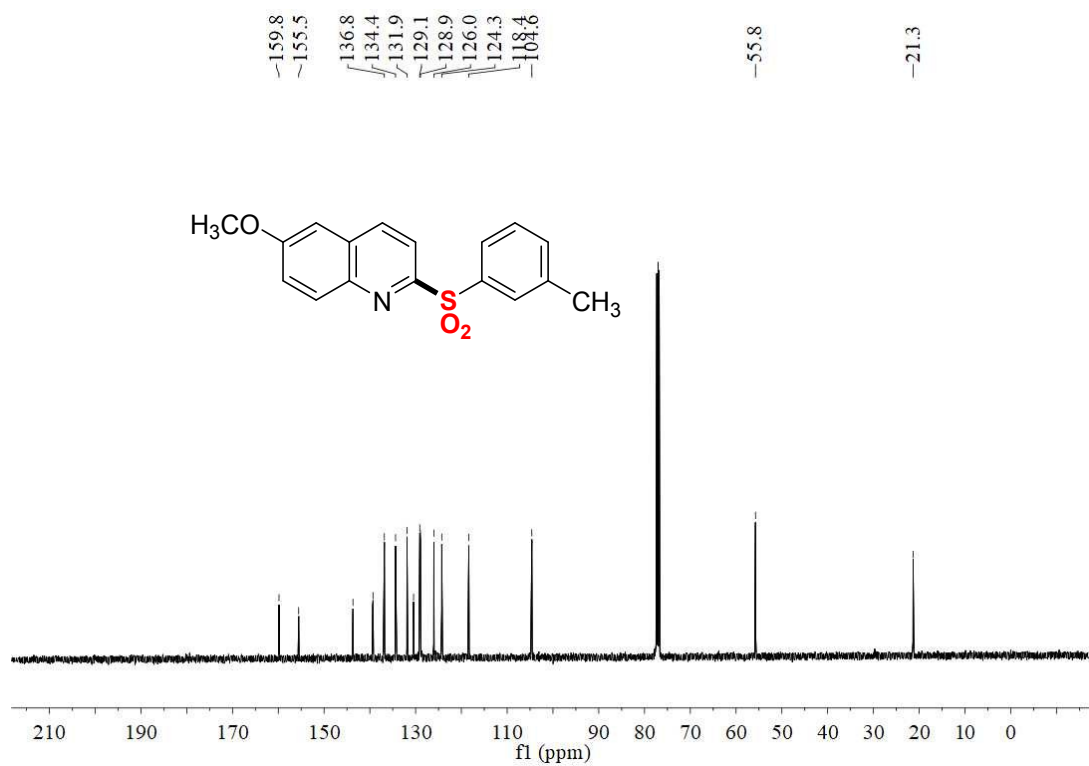

### 3aj <sup>1</sup>H NMR

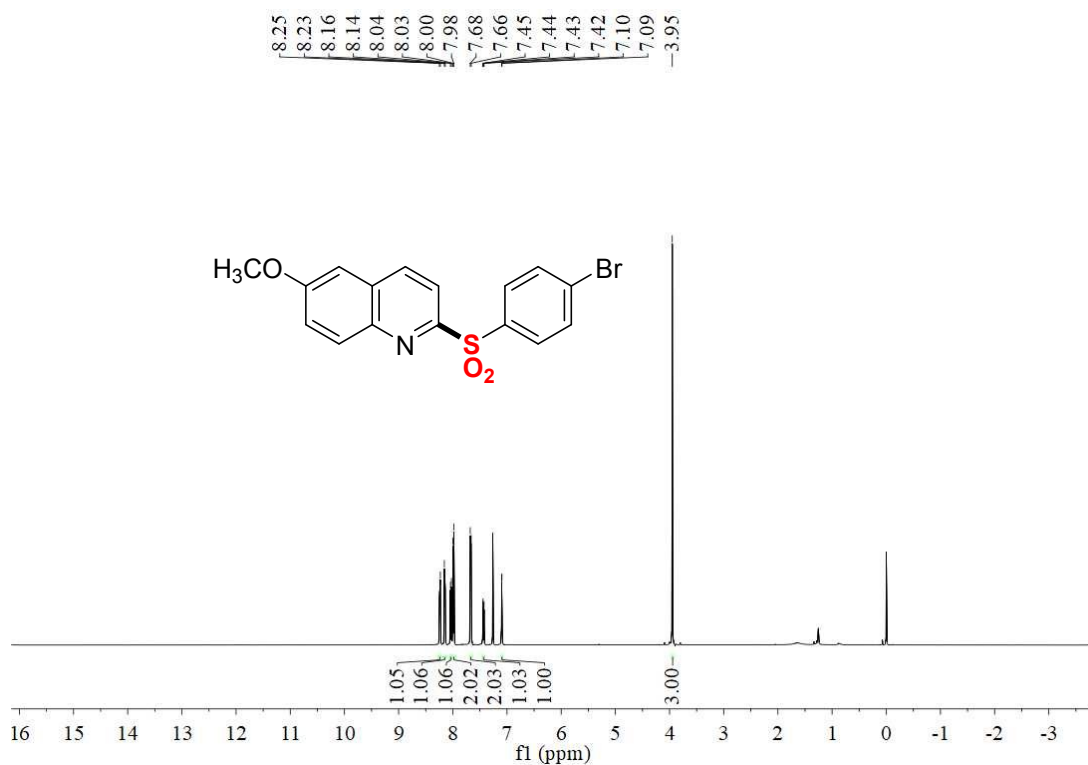

### 3aj <sup>13</sup>C NMR

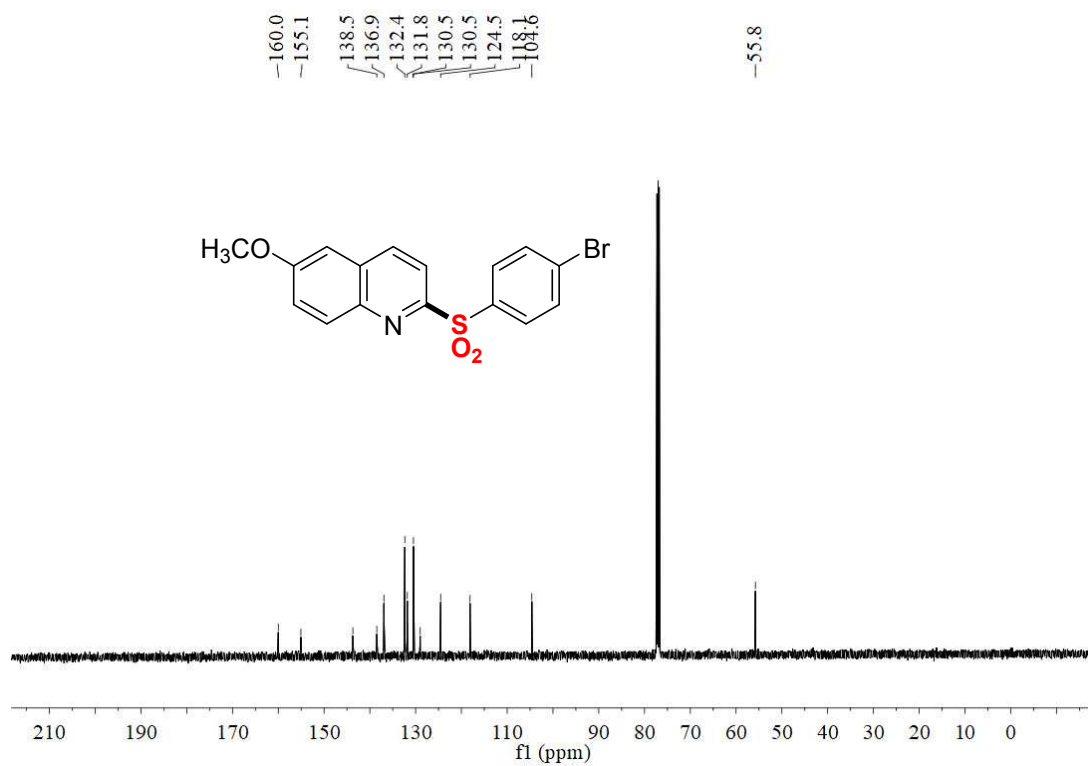

### 3ak <sup>1</sup>H NMR

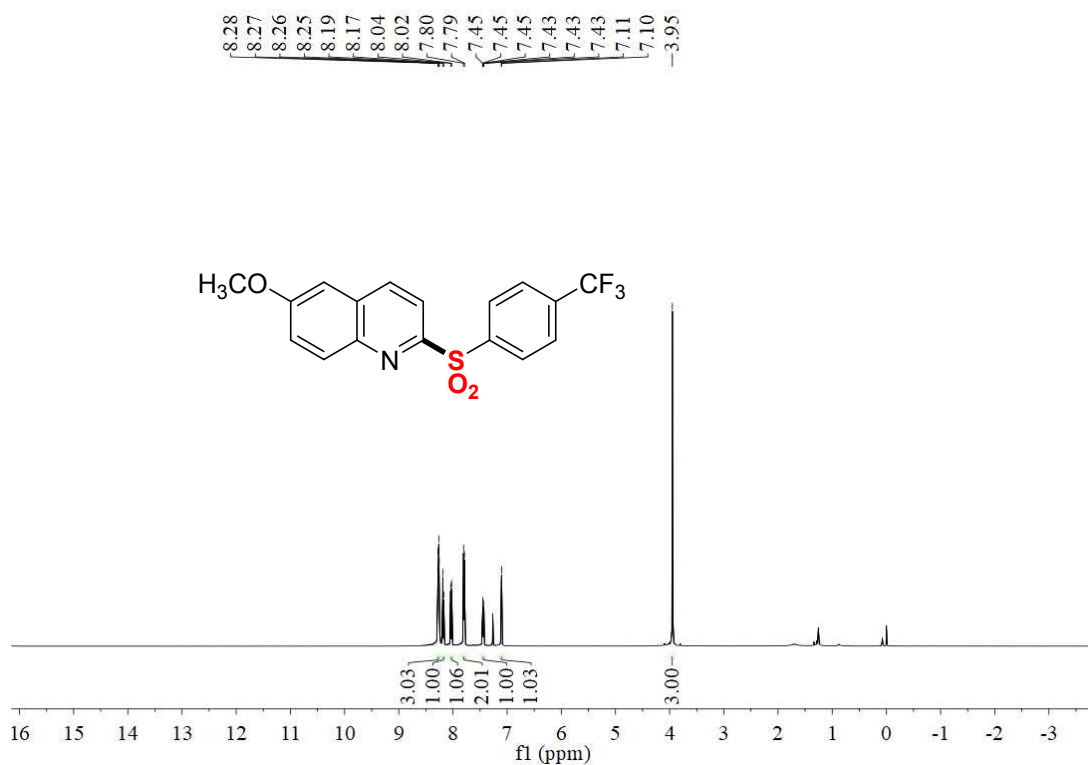

### 3ak <sup>13</sup>C NMR

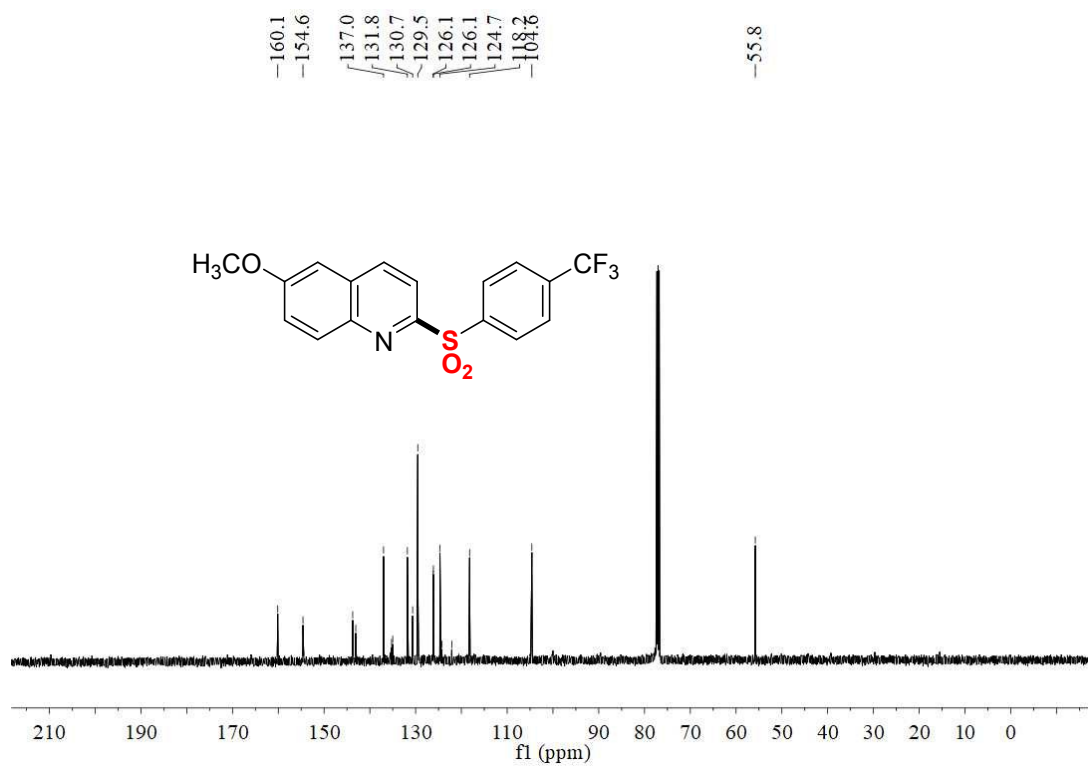



### 3al <sup>1</sup>H NMR

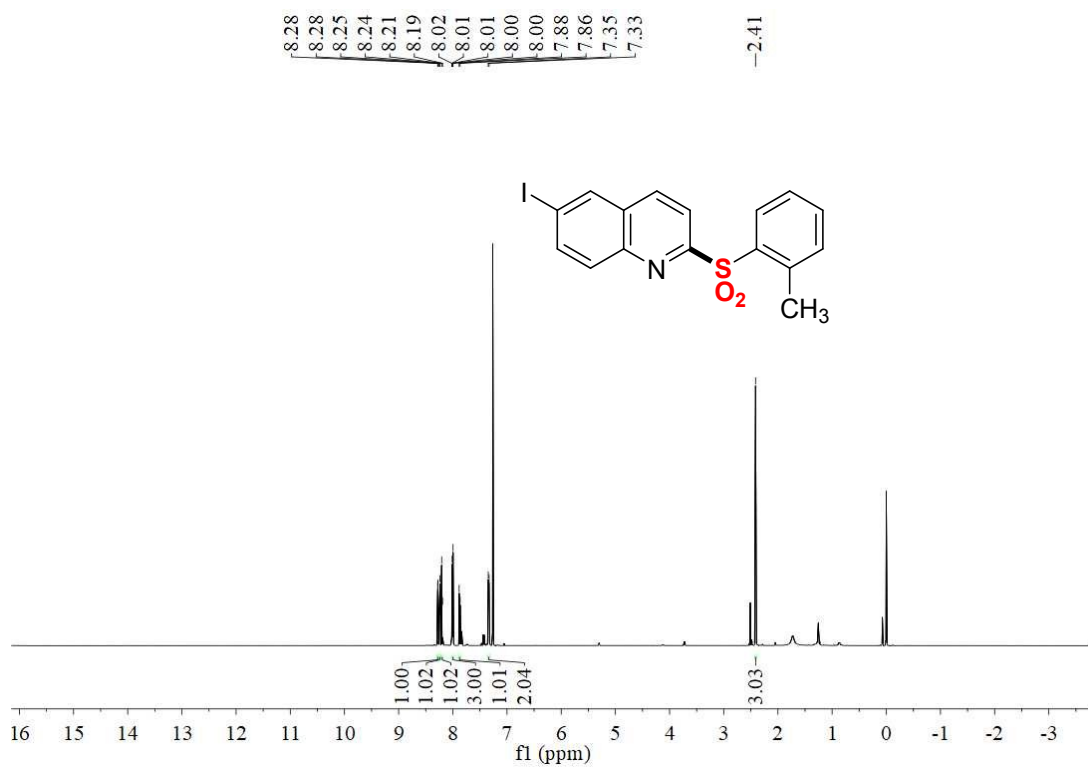

### 3al <sup>13</sup>C NMR

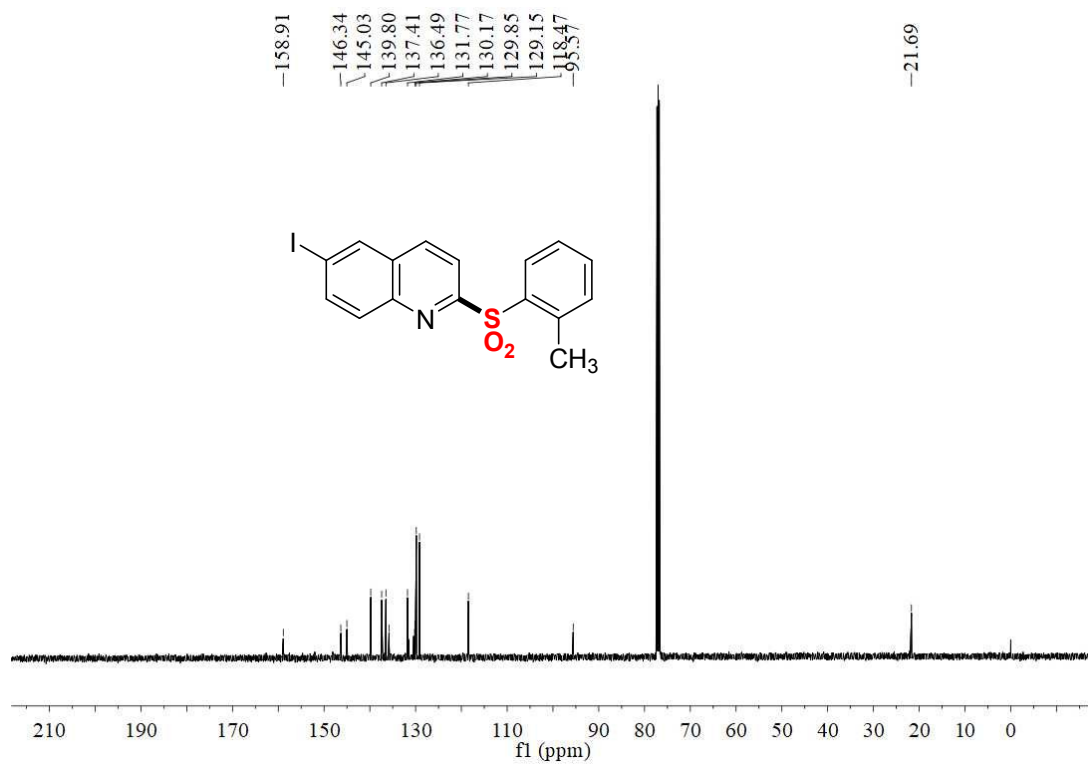

### 3am <sup>1</sup>H NMR

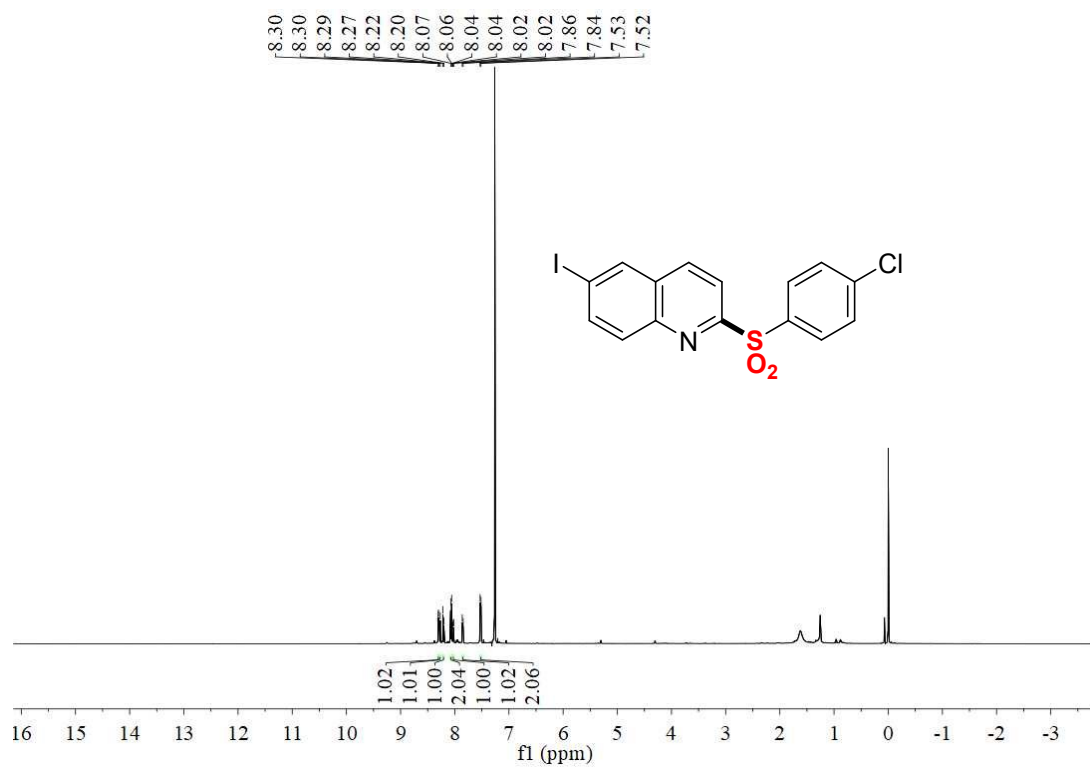

### 3am <sup>13</sup>C NMR

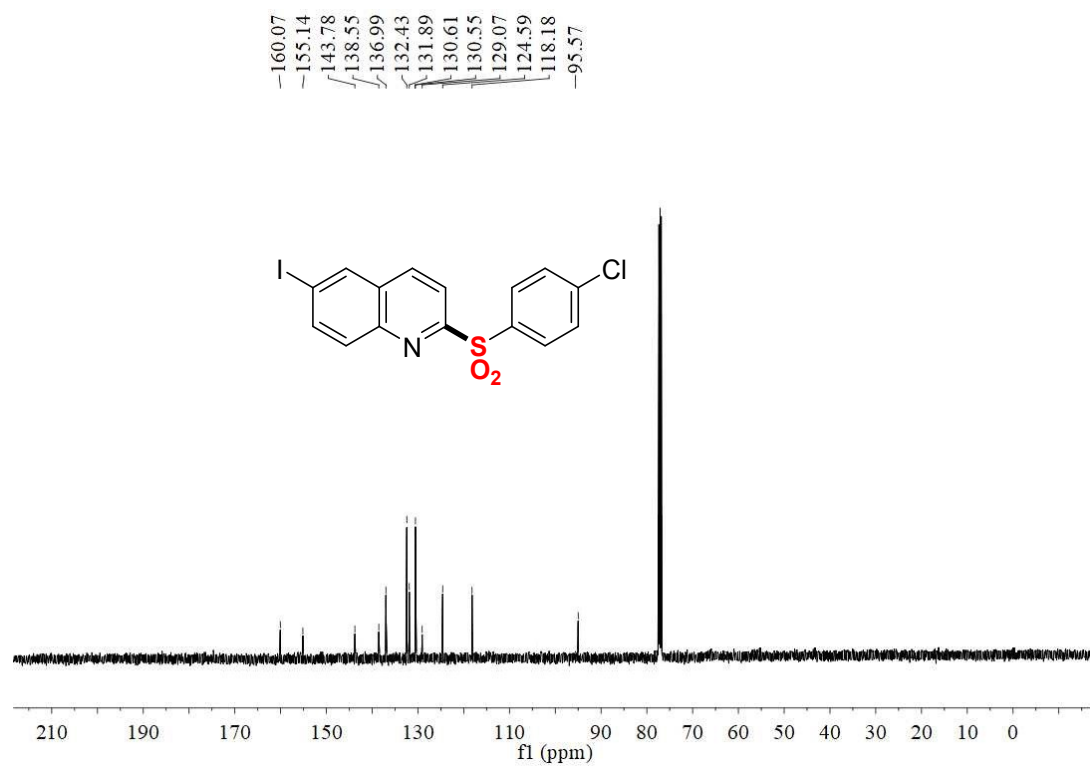

### 3an <sup>1</sup>H NMR

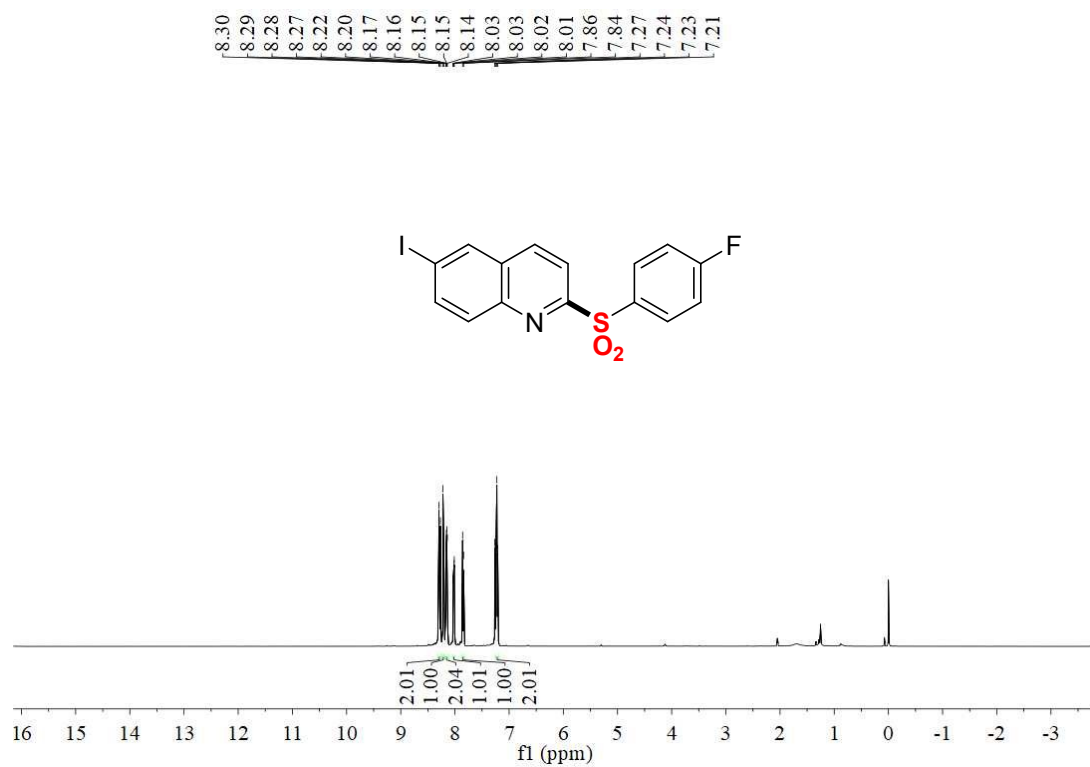

### 3an <sup>13</sup>C NMR

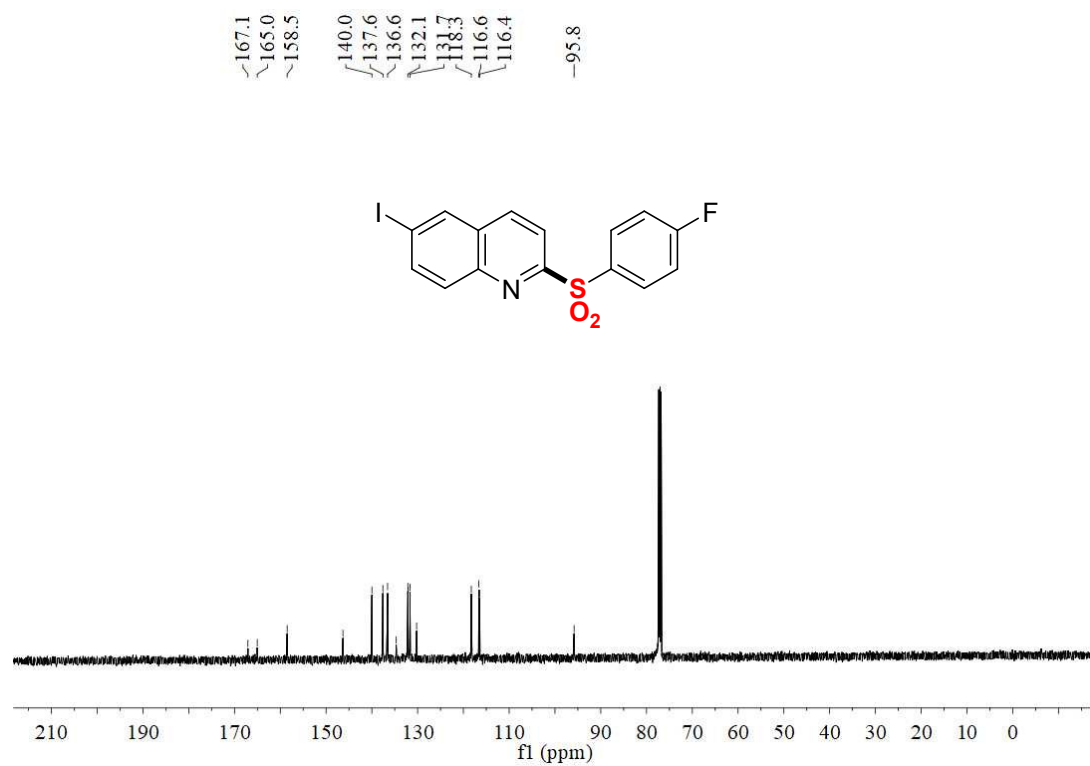

### 3ao <sup>1</sup>H NMR

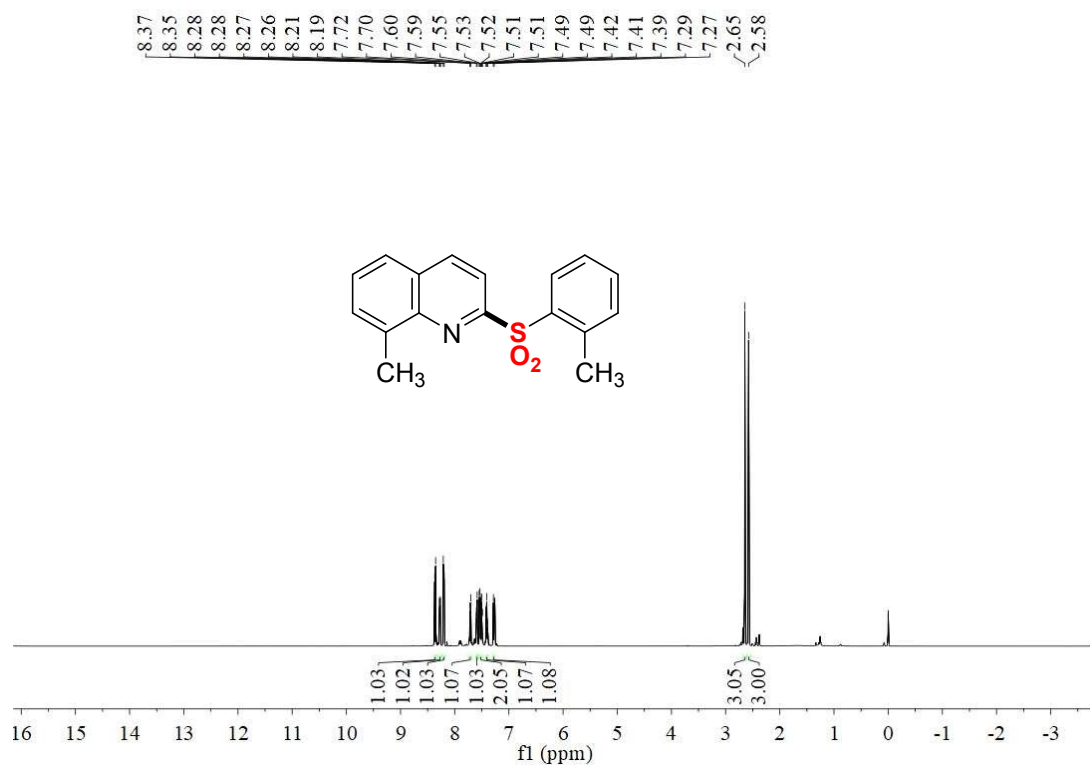

### 3ao <sup>13</sup>C NMR

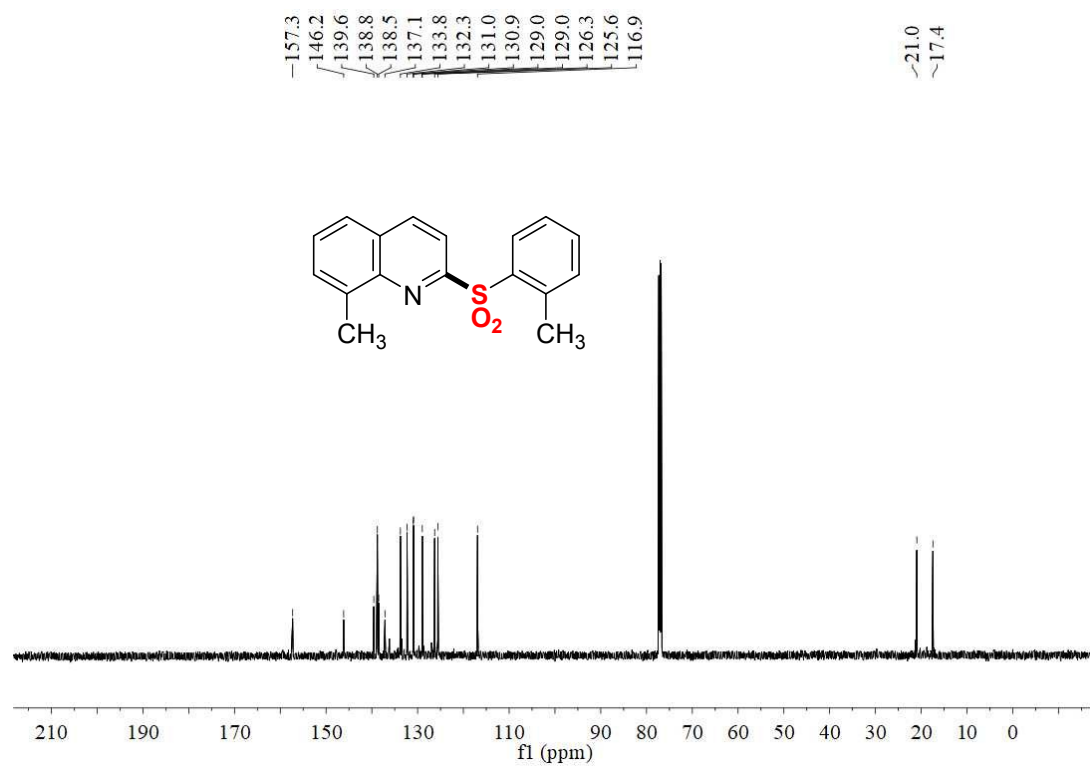

### 3ap <sup>1</sup>H NMR

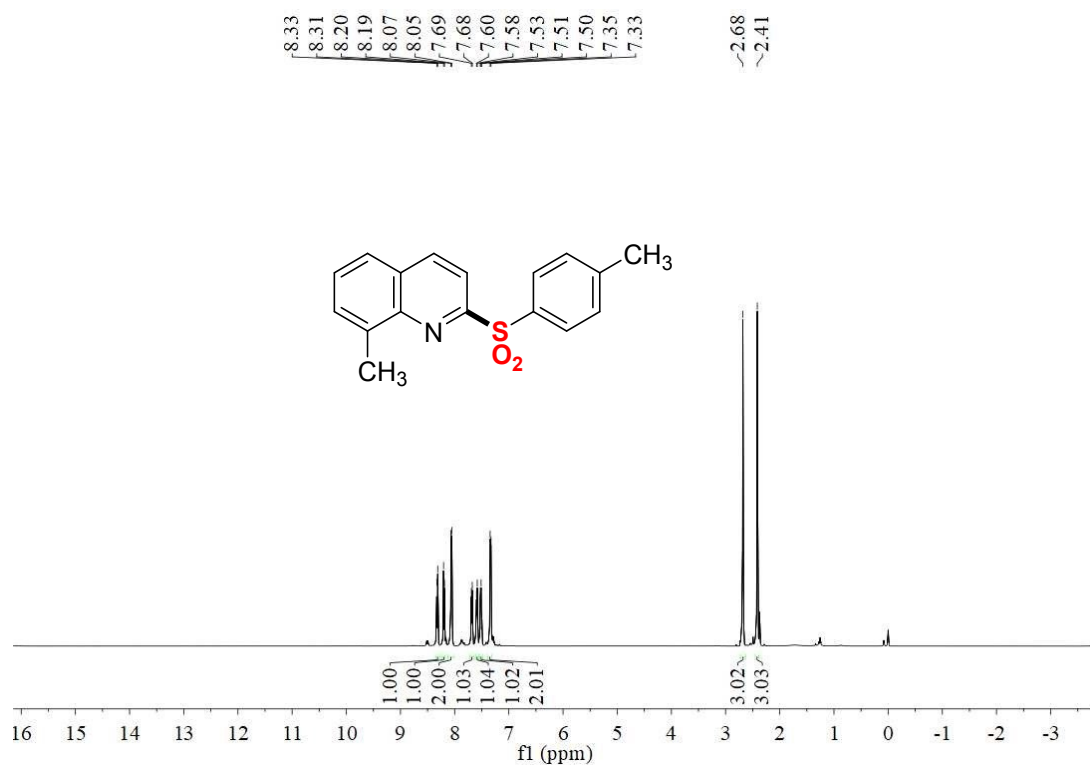

### 3ap <sup>13</sup>C NMR

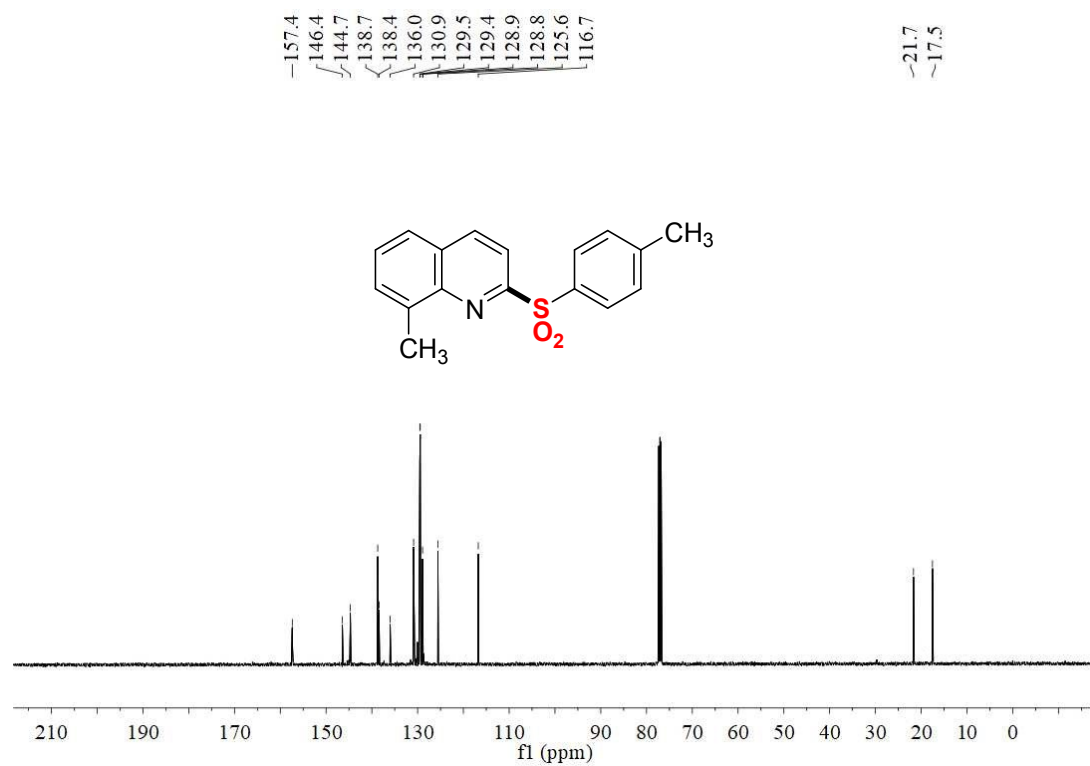

### 3aq <sup>1</sup>H NMR

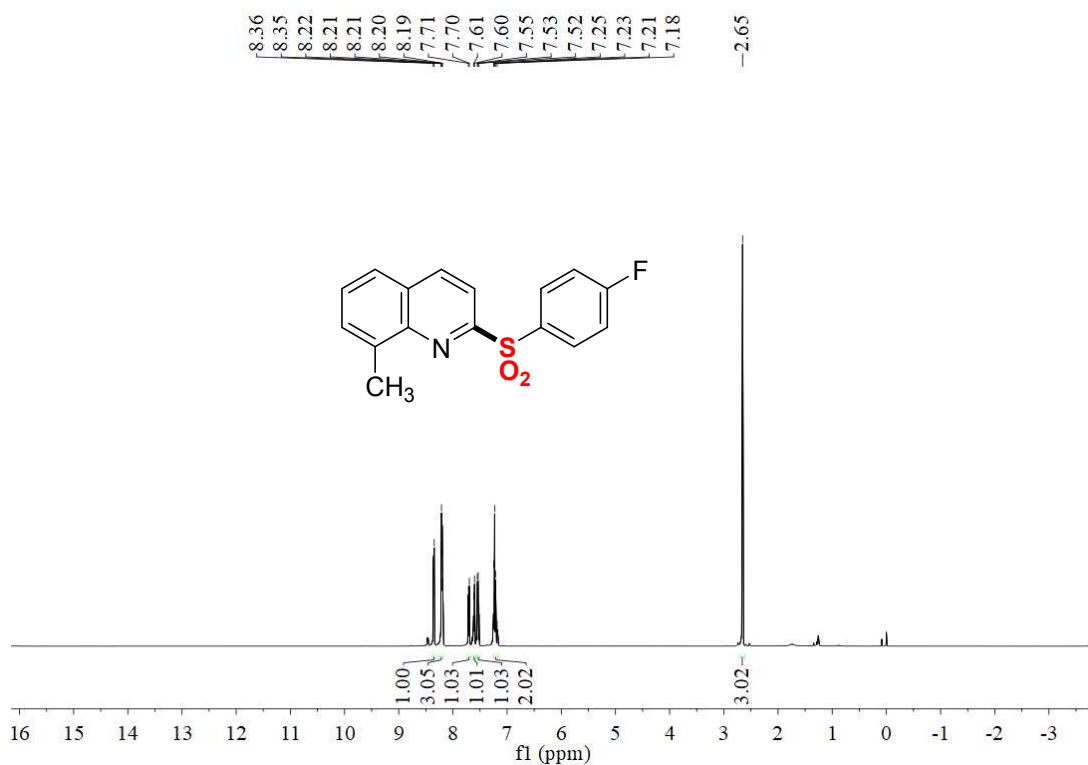

### 3aq <sup>13</sup>C NMR

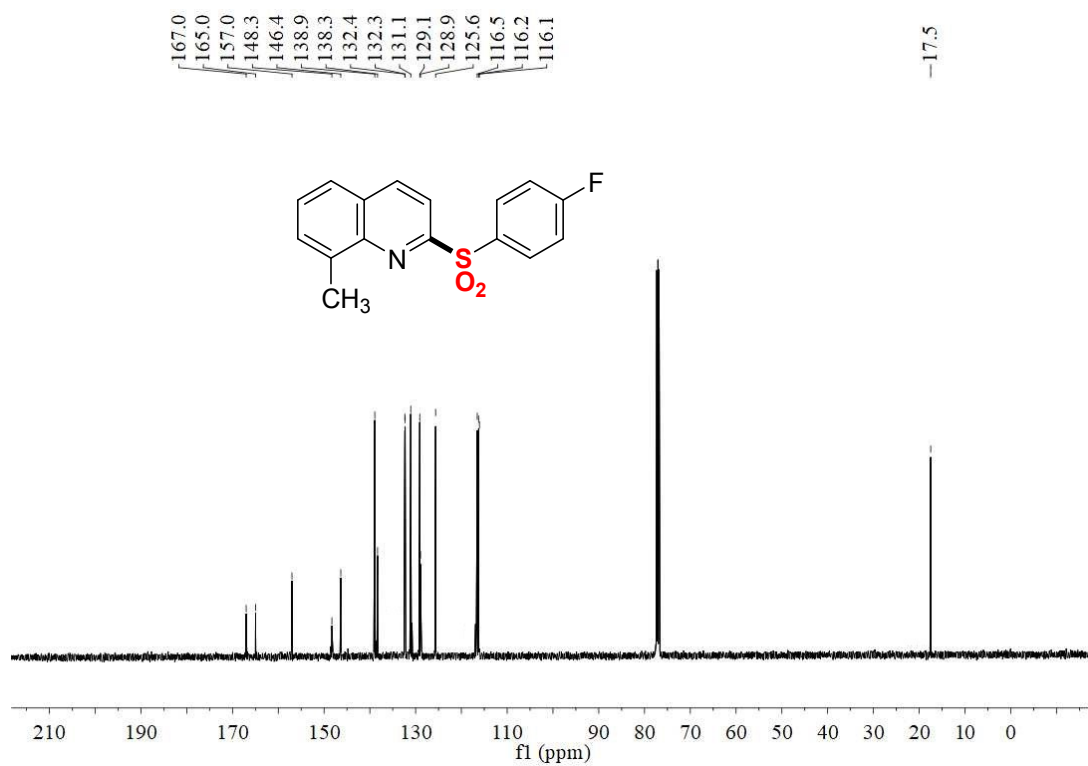

### 5 <sup>1</sup>H NMR

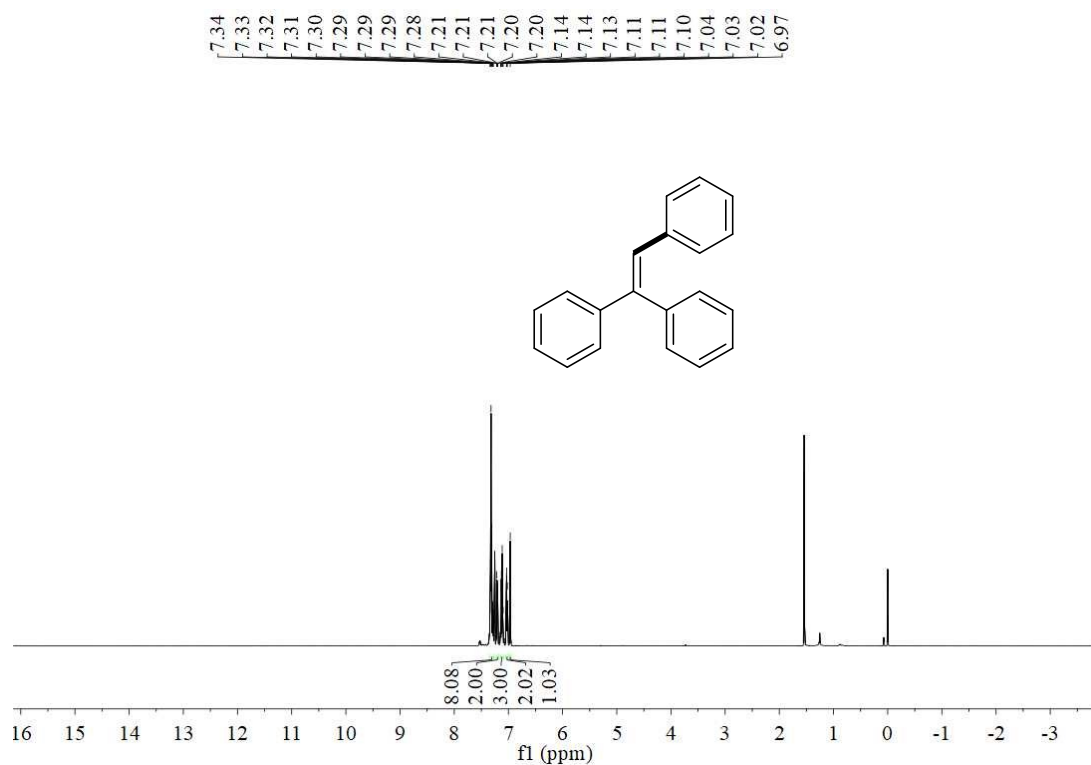

### 5 <sup>13</sup>C NMR

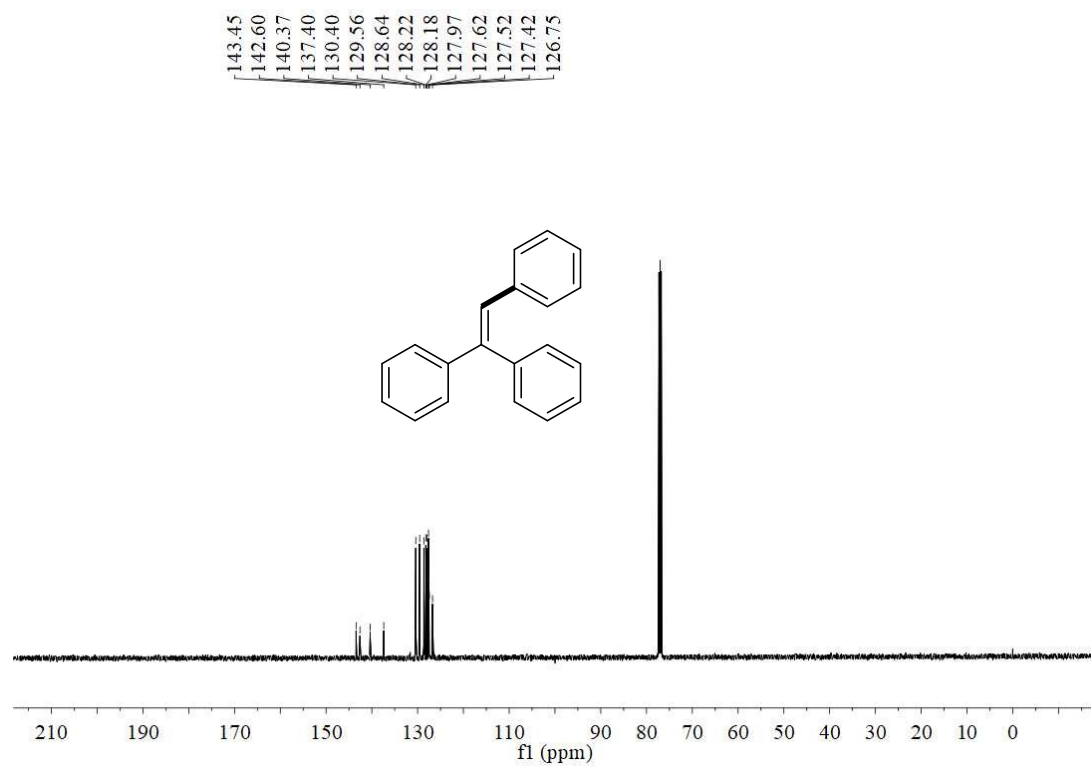

6 <sup>1</sup>H NMR

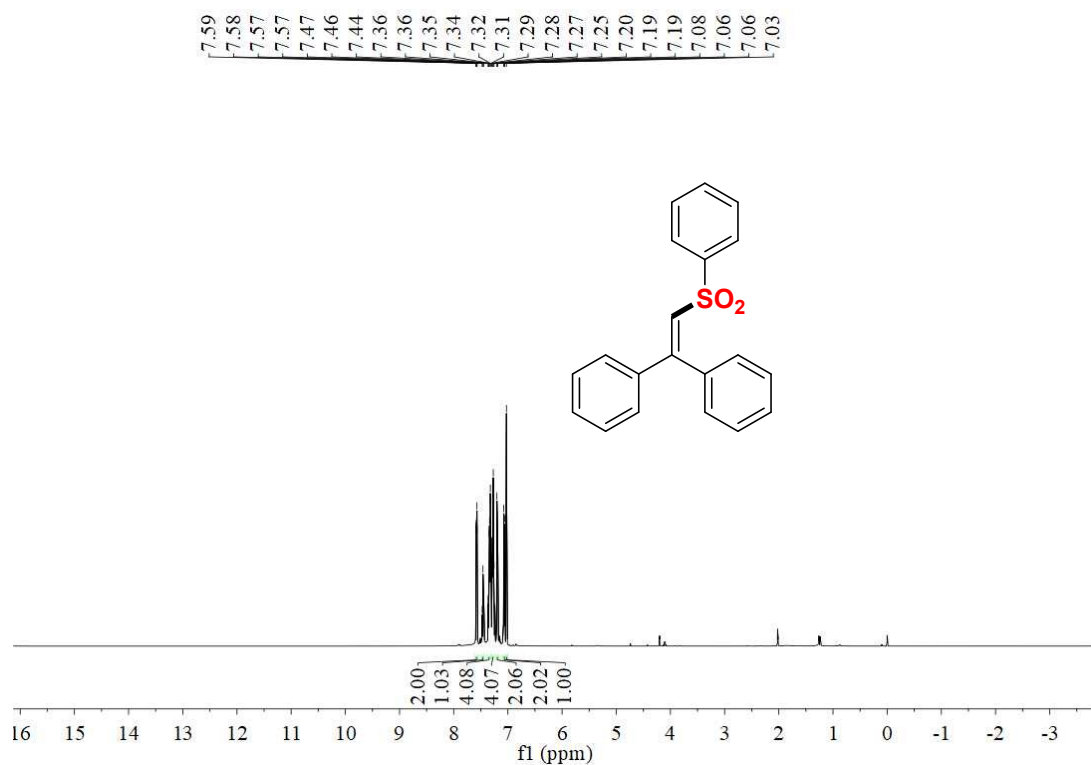

6 <sup>13</sup>C NMR

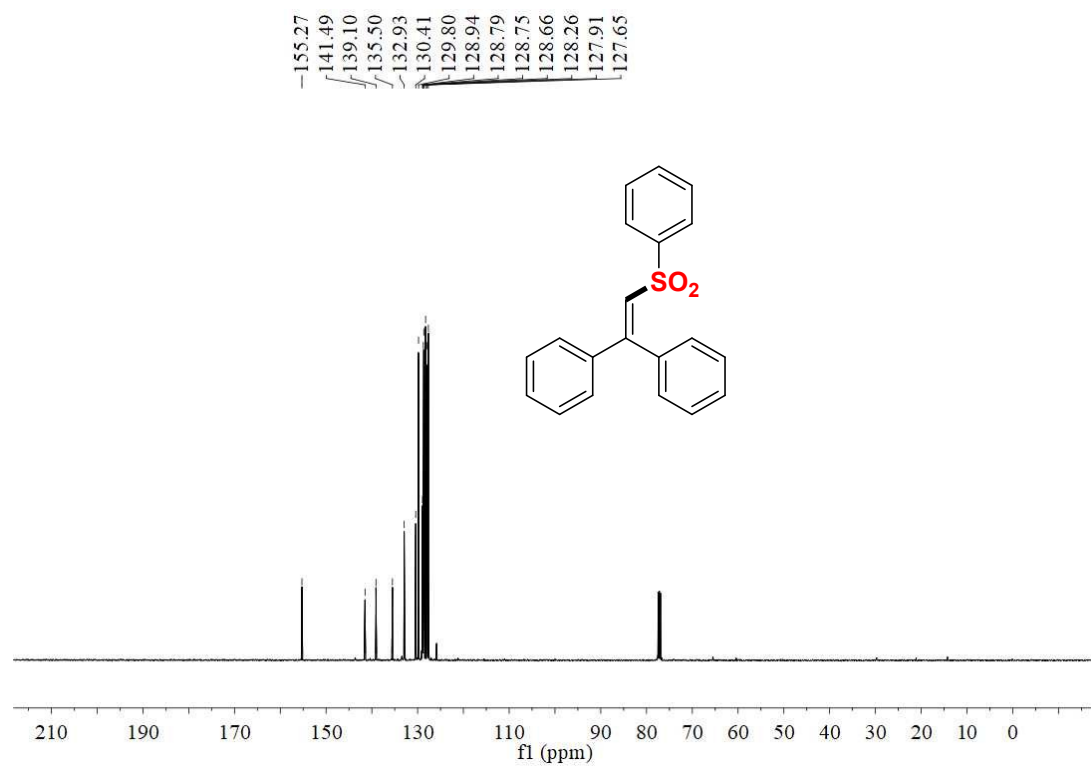

Supplement: c9ob02106j1.pdf [file c9ob02106j1.pdf]
